# Supplementary material
Source: PubMed Central journal article supplement (PMC4819577)
Supplement: inan_a_1002868_sm1556.pdf [file inan_a_1002868_sm1556.pdf]

## Supplementary Information

### **Molecular toxicity of cerium oxide nanoparticles to the freshwater alga *Chlamydomonas reinhardtii* is associated with supra-environmental exposure concentrations**

*Nadine S. Taylor*<sup>1</sup>, *Ruth Merrifield*<sup>2,3</sup>, *Tim D. Williams*<sup>1</sup>, *J. Kevin Chipman*<sup>1</sup>, *Jamie R. Lead*<sup>2,3</sup>, *Mark R. Viant*<sup>1\*</sup>

<sup>1</sup> School of Biosciences, University of Birmingham, Edgbaston, Birmingham, B15 2TT, UK

<sup>2</sup> SmartState Center for Environmental Nanoscience and Risk, The Arnold School of Public Health, Environmental Health Sciences, University of South Carolina, Columbia, South Carolina 29208, USA.

<sup>3</sup> School of Geography, Earth and Environmental Science, University of Birmingham, Edgbaston, Birmingham, B15 2TT, UK.

\*Corresponding Author: Professor Mark R. Viant

School of Biosciences, University of Birmingham, Edgbaston, Birmingham, B15 2TT, UK

Phone: +44 (0)121 414 2219

FAX: +44 (0)121 414 5925

Email: [M.Viant@bham.ac.uk](mailto:M.Viant@bham.ac.uk)

## Supplementary Experimental Section

### Ceria NP synthesis and characterisation in exposure media

The PVP-coated ceria NPs tested in this study were synthesised and characterised as described previously (Merrifield et al. 213). Larger, 'bulk' particles of ca. 500-600 nm were prepared in a similar manner, with identical reagents, but produced by heating an unstirred suspension at 140°C for 4 hours. The determination of the rate of dissolution of Ce from the core of the PVP-coated ceria NPs was calculated by placing the NPs into 100mL of exposure media at a concentration of 1ppm, without the presence of *C. reinhardtii*, under otherwise identical conditions as those used for the exposure studies. Aliquots of 10mL were collected at four time-points, 0, 24, 48 and 72 hours and then ultra-filtered using a 10mL capacity stirred ultrafiltration cell and a 1kDa regenerated cellulose membrane (Millipore Corporation, USA). Filtration was carried out at a pressure of 100psi (nitrogen gas; BOC) using 10mL of solution added to the cell and filtered slowly to reduce the volume in the ultrafiltration cell down to 5mL. At no stage were the solutions left to dry. Nitric acid was added to the samples after separation to adjust to pH 2. The Ce ions were measured by ICP-MS using an Agilent 4500ce (Agilent Technologies). Ce ion standards were used to correct for membrane losses of dissolved cerium. Both retentate and filtrate were quantified, which were assumed to be the total and ionic concentrations respectively, and particle concentrations were calculated by difference. A correction was made for sorption of dissolved metal to the membranes and container walls.

### Culture of *C. reinhardtii* and ceria NP exposure studies

*C. reinhardtii* cultures (CCAP strain 11/32c) were grown in modified Bolds Basal Medium (BBM; Table S4, below) in sterile 2L Erlenmeyer flasks and maintained in shaking (120rpm) growth incubators (Multitron, Infors HT; Switzerland) under a 12:12 light:dark regime at 22°C. Optical density at 660nm was used to determine cell density in comparison to a pre-determined growth curve for all measures of algal growth. For all exposure studies, *C. reinhardtii* cells in exponential growth phase were treated with the relevant nominal concentrations of the NPs in 50mL BBM. For the standard growth studies, cells were inoculated at a starting density of  $5 \times 10^4$  cells/mL, while for the molecular studies the starting density was increased to  $1 \times 10^6$  cells/mL to allow for a suitable amount of biomass for subsequent analyses. All growth inhibition studies were of 72-hour duration, under continuous light as detailed in standard test guidelines (OECD, 2002), and a positive control of  $\text{CuSO}_4$  (160µg/L) at a concentration known to induce 50% growth inhibition was used to validate each experiment.

Growth inhibition effect concentration ( $\text{EC}_{50}$ ) studies were conducted over a wide range of ceria NP concentrations (0.5-80000µg/L), also for ionic Ce ( $\text{CeNO}_3$ ; 0.5-32mg/L) and for free PVP (0.56-56.44mg/L). Further growth inhibition studies, combined with 'omics analyses, were performed at two different dosing regimens: firstly at supra-environmental levels (80, 400, 2000 and 10000µg/L; n=8) and secondly across predicted environmental concentrations (0.029, 0.144 and 0.72µg/L; n=4). Relevant controls were also incorporated into these studies, consisting of an ionic control ( $\text{CeNO}_3$ , corresponding to 0.01% of the highest ceria NP concentration used, i.e. 1µg/L; n=8), a free PVP control (1.94mg/L; n=4), bulk ceria (10000µg/L; n=8) and unexposed control samples.

### **Measurement of the uptake of ceria NPs by *C. reinhardtii*.**

Aliquots containing  $1 \times 10^4$  algae cells were collected in parallel to the exposures used for the toxicity study due to logistical constraints. Each sample was filtered using a  $0.45\mu\text{m}$  regenerated cellulose membrane, and the retentate re-dispersed in 10 mL of ultrapure water and gently agitated to remove any nanoparticles loosely bound to the exterior of the cells. The algal cells were then filtered again through a  $0.45\mu\text{m}$  filter. The filtrate was collected and acidified to pH 2 and Ce concentrations measured by ICP-MS. The retentate, after similar acidification and ICP-MS measurement, was assumed to be ceria which had been internalised or strongly adhered to the walls of the algal cells, while the filtrate was assumed to be a measure of the free and weakly bound NPs. Aggregation was assumed to be minimal based on data here and elsewhere (Merrifield et al. 2013).

### **Scanning electron microscopy of *C. reinhardtii***

Following 72-hour exposures, as described above, the algal cells were centrifuged to form a pellet and the supernatant removed. The primary fixation of the pellet of algae cells was performed by adding 5mL of 2.5% glutaraldehyde in 100mM phosphate buffer (pH 7.0) and leaving to incubate for between 2-24 hours at  $4^\circ\text{C}$ . No staining was performed as preliminary studies indicated commonly used stains caused sample damage and/or problems with the imaging; in fact, contrast between the algal cells and ceria was enhanced in the absence of stains. Dehydration was performed in a sequential alcohol gradient of 50%, 70%, 80% and 100%, changing every 15 minutes. The 100% alcohol solution was drained and replaced with fresh 100% alcohol three times. Resin embedding was performed by replacing the alcohol by propylene oxide. This was changed twice at 15-minute intervals, and then exchanged by a 50:50 mixture of propylene oxide and resin (Agar 100 resin) on a rotator for 3 hours. Each sample was vacuum embedded in Mollenhauer epoxy resin (Epon 812) and 100nm thick sections were cut with a glass knife on a Reichert Ultracut ultra-microtome. These sections were imaged on a Jeol 7000 scanning electron microscope fitted with a Schottky FEG emitter, using an acceleration voltage of 20 keV and both backscatter and STEM modes. Viewing in backscatter mode allowed for a greater Z contrast to be observed with high atomic number nanoparticles showing as bright areas. Viewing in STEM mode caused the higher density nanoparticles to appear as dark, electron opaque areas. Other instrument parameters were chosen to achieve the highest possible resolution images while minimising sample damage. Elemental analysis was performed using an Oxford Instruments INCA EDS system with Si-Li x-sight detector.

### **Mass spectrometry based metabolomics**

Following the 72-hour growth inhibition exposures at both the supra-environmental and predicted environmental dosing regimens, metabolites were extracted from each sample of *C. reinhardtii* using a modified version of published methods (Bölling & Fiehn 2005; Lee & Fiehn 2008). Briefly, a  $400\mu\text{L}$  aliquot of *C. reinhardtii* cell suspension was retrieved from each exposure flask and added to 1.6mL of 70% methanol that was pre-cooled on dry ice in a 2mL Eppendorf tube, and mixed by inversion. Samples were then centrifuged as described in Bölling and Fiehn (2005), the supernatants carefully discarded, and then each pellet was flash frozen in liquid nitrogen and stored at  $-80^\circ\text{C}$  until metabolite extraction. Metabolites were extracted from *C. reinhardtii* samples as well as an extract blank (no biological material) using the methods described in Taylor et al. (2009) with an adjustment to the solvent volumes. Here,  $500\mu\text{L}$  of ice-cold methanol with  $200\mu\text{L}$  ice-cold water were used for

the first stage of the extraction, followed by 500 $\mu$ L of ice-cold chloroform with a further 250 $\mu$ L of ice-cold water to yield a biphasic solution. All solvents used for the quenching and extraction procedures were of HPLC grade. Polar fractions were dried in a centrifugal concentrator; non-polar samples were not used in this study.

Dried polar extracts were resuspended for metabolomics analysis as previously described (Taylor et al. 2009) and then metabolites were measured using a hybrid 7-T Fourier transform ion cyclotron resonance (FT-ICR) mass spectrometer (LTQ FT Ultra, Thermo Fisher Scientific). Each sample was analysed in negative ion mode, in triplicate, using the SIM (selected ion monitoring)-stitching method from  $m/z$  70–590, and the transient data processed using the methods reported previously using  $m/z$  100 SIM windows with a  $m/z$  30 overlap, and filtering parameters set at 2-out-of-3 replicate filter with 85% sample filter and a mass error margin of 1.5ppm (Weber et al. 2011; Southam et al 2007; Payne et al. 2009). Further data processing steps, including probabilistic quotient normalisation, k-nearest neighbour (KNN) imputation of missing values and generalized-log transformation, were as described previously (Taylor et al. 2009, 2010; Hrydziusko & Viant 2012). Custom written software MI-Pack was used to putatively annotate the detected peaks with metabolite names (1.5ppm mass error margin), according to the Metabolomics Standards Initiative definitions (Weber et al. 2011; Weber & Viant 2010; Sumner et al. 2007). Subsequently, the putatively annotated metabolites were investigated using the web-based software MetaboAnalyst 2.0 for biochemical pathway enrichment analysis (Xia et al. 2012).

Both univariate and multivariate statistical analyses were conducted to investigate any metabolic perturbations in response to *C. reinhardtii* exposure to ceria NPs. Methods were as described in Taylor et al. (2009), briefly, MATLAB (version 7, The Mathworks) with PLS-Toolbox (Eigenvector Research) was used to conduct the principal components analysis (PCA) on the covariance matrix. The PCA was used to visually determine the metabolic similarities and differences between treatment groups and controls. Univariate t-tests were employed to discover if any peaks in the mass spectra changed intensity significantly, using a false discovery rate (FDR) of 5% to correct for multiple testing (Benjamini & Hochberg 1995).

### **Microarray based transcriptomics**

RNA was extracted from each sample of *C. reinhardtii*. Briefly, a 15mL cell suspension was taken from each exposure flask, and centrifuged at 3000rpm for 10min at 4°C. The supernatant was carefully discarded and the cell pellet flash frozen in liquid nitrogen and stored at -80°C until RNA extraction. RNA was extracted using the Qiagen RNeasy Plant Mini kit (Qiagen Ltd) following the manufacturer's recommended protocol. Microarray analyses were conducted on the following sample groups: unexposed controls (n=4), ionic Ce control (CeNO<sub>3</sub>; 0.008 $\mu$ g/L; n=7) free PVP control (1.94mg/L; n=4), and two ceria NP concentrations (0.144 $\mu$ g/L; n=4, and 10000 $\mu$ g/L; n=7).

The oligonucleotide microarray was designed via Agilent eArray (Agilent Technologies) using predicted transcript sequences derived from the JGI *Chlamydomonas reinhardtii* genome project v4.0 (downloaded in June 2010: Merchant et al. 2007). Annotation from JGI was supplemented from Phytozome via BioMart and by Blast2GO (Götz et al. 2008). The microarrays were printed in 8x15k format (Agilent-029192:8x15k BhamChlamy15k1). The array design is available from ArrayExpress under accession A-MEXP-2384. Labelling was achieved using the Agilent One Colour Low Input Linear

Amplification kit with Spike-ins (Agilent Technologies) according to the manufacturer's protocol. Total RNA was converted to cRNA and labelled with fluorophore Cy3. Uncoupled Cy3 was removed using the RNeasy Mini kit (Qiagen) following the manufacturer's instructions. Labelling efficiency was determined by NanoDrop ND-1000 UV-VIS Spectrophotometer, version 3.2.1 (NanoDrop, USA). A yield of 0.825µg cRNA, and a specific activity (Cy3 dye incorporation) of >6pmol Cy3/µg cRNA was considered sufficient. Microarray hybridisation was performed using an Agilent Gene Expression Hybridisation kit according to the manufacturer's protocol. Briefly, the hybridisation mixes were loaded onto 8x15k format slides (Agilent-029192:8x15k BhamChlamy15k1) hybridised overnight (65°C), washed, stabilised and dried. The dried slides were scanned using an Agilent G2565CA microarray scanner system (Agilent Technologies).

MIAME-compliant raw microarray data and experimental design are available at the ArrayExpress database ([www.ebi.ac.uk/arrayexpress](http://www.ebi.ac.uk/arrayexpress)) under accession number E-MTAB-2454. GeneSpring vGX7.3 (Agilent Technologies) and MultiExperimental Viewer (MeV) v4.7 were used for analysing the processed signal data (where fluorescence intensities comprised of the background subtracted signal corrected by multiplicative de-trending). Agilent feature extraction software (FE) was used for quality control, both at sample and gene level (Saeed et al. 2003). Data flagged as present in at least 20 out of 25 samples and exceeding a raw fluorescence value of 114 were used for analysis. Data were quantile normalised with GE workbench, SAM (Statistical Analysis of Microarrays) analysis was carried out within MeV (Floratos et al. 2010; Tusher et al. 2001). PCA was used to visually determine the metabolic similarities and differences between treatment groups and controls. Annotation enrichment analyses were performed using the Algal Functional Annotation Tool (<http://pathways.mcdb.ucla.edu/algal/about.html>) and with Blast2GO (Götz et al. 2008). Annotation enrichment compared transcripts statistically significantly altered in expression, as determined by SAM, with the list of all detected transcripts.

## References

- Benjamini Y, Hochberg Y. 1995. Controlling the false discovery rate: a practical and powerful approach to multiple testing. *J. R. Statist. Soc. B.* 57:289-300.
- Bölling C, Fiehn O. 2005. Metabolite profiling of *Chlamydomonas reinhardtii* under nutrient deprivation. *Plant Physiol.* 139: 1995-2005.
- Floratos A, Smith K, Ji Z, Watkinson J, Califano A. 2010. geWorkbench: an open source platform for integrative genomics. *Bioinformatics.* 26:1779-1780.
- Götz S, García-Gómez JM, Terol J, Williams TD, Nagaraj SH, Nueda MJ, et al. 2008. A High-throughput functional annotation and data mining with the Blast2GO suite. *Nucl. Acids Res.* 36(10):3420-3435.
- Hrydziusko O, Viant MR. 2012. Missing values in mass spectrometry based metabolomics: and undervalued step in the data processing pipeline. *Metabolomics.* 8:161-174.
- Lee DY, Fiehn O. 2008. High quality metabolomic data for *Chlamydomonas reinhardtii*. *Plant Methods.* 4:7.

- Merchant SS, Prochnik SE, Vallon O, Harris EH, Karpowicz SJ, Witman GB, et al. 2007. The *Chlamydomonas* genome reveals the evolution of key animal and plant functions. *Science*. 318(5848):245-250.
- Merrifield RC, Wang ZW, Palmer RE, Lead JR. 2013. Synthesis and characterisation of polyvinylpyrrolidone coated cerium oxide nanoparticles. *Environ. Sci. Technol.* 47:12426-12433.
- OECD. 2002. Guidelines for testing of chemicals, No 201, Freshwater alga and cyanobacteria, growth inhibition test. Organisation for Economic Cooperation and Development.
- Payne TG, Southam AD, Arvanitis TN, Viant MR. 2009. A Signal Filtering Method for Improved Quantification and Noise Discrimination in Fourier Transform Ion Cyclotron Resonance Mass Spectrometry-Based Metabolomics Data. *J. Am. Soc. Mass Spectrom.* 20:1087–1095
- Saeed AI, Sharov V, White J, Li J, Liang W, Bhagabati N, et al. 2003. TM4: a free, open-source system for microarray data management and analysis. *Biotechniques*. 34(2):374-378.
- Southam AD, Payne TG, Cooper HJ, Arvanitis TN, Viant MR. 2007. Dynamic Range and Mass Accuracy of Wide-Scan Direct Infusion Nanoelectrospray Fourier Transform Ion Cyclotron Resonance Mass Spectrometry-Based Metabolomics Increased by the Spectral Stitching Method. *Anal. Chem.* 79:4595-4602
- Sumner LW, Amberg A, Barrett D, Beale MH, Beger R, Daykin CA, et al. 2007. Proposed minimum reporting standards for chemical analysis. *Metabolomics*. 3:211-221.
- Taylor NS, Weber RJM, Southam AD, Payne TG, Hrydziuszko O, Arvanitis TN, Viant MR. 2009. A new approach to toxicity testing in *Daphnia magna*: application of high throughput FT-ICR mass spectrometry metabolomics. *Metabolomics*. 5:44-58.
- Taylor NS, Weber RJM, White TA, Viant MR. 2010. Discriminating between Different Acute Chemical Toxicities via Changes in the Daphnid Metabolome. *Toxicol. Sci.* 118(1):307-317.
- Tusher VG, Tibshirani R, Chu G. 2001. Significance analysis of microarrays applied to the ionizing radiation response. *Proc. Natl. Acad. Sci. USA*. 98:5116-5121.
- Weber RJ, Southam AD, Sommer U, Viant MR. 2011. MI-Pack: Characterization of isotopic abundance measurements in high resolution FT-ICR and Orbitrap mass spectra for improved confidence of metabolite identification. *Anal. Chem.* 83:3737-3743.
- Weber RJM, Viant MR. 2010. MI-Pack: Increased confidence of metabolite identification in mass spectra by integrating accurate masses and metabolic pathways. *Chemometr. Intell. Lab.* 104:75–82
- Xia J, Mandal R, Sineelnikov I, Broadhurst D, Wishart DS. 2012. MetaboAnalyst 2.0 - a comprehensive server for metabolomic data analysis. *Nucl. Acids Res.* 1-7.

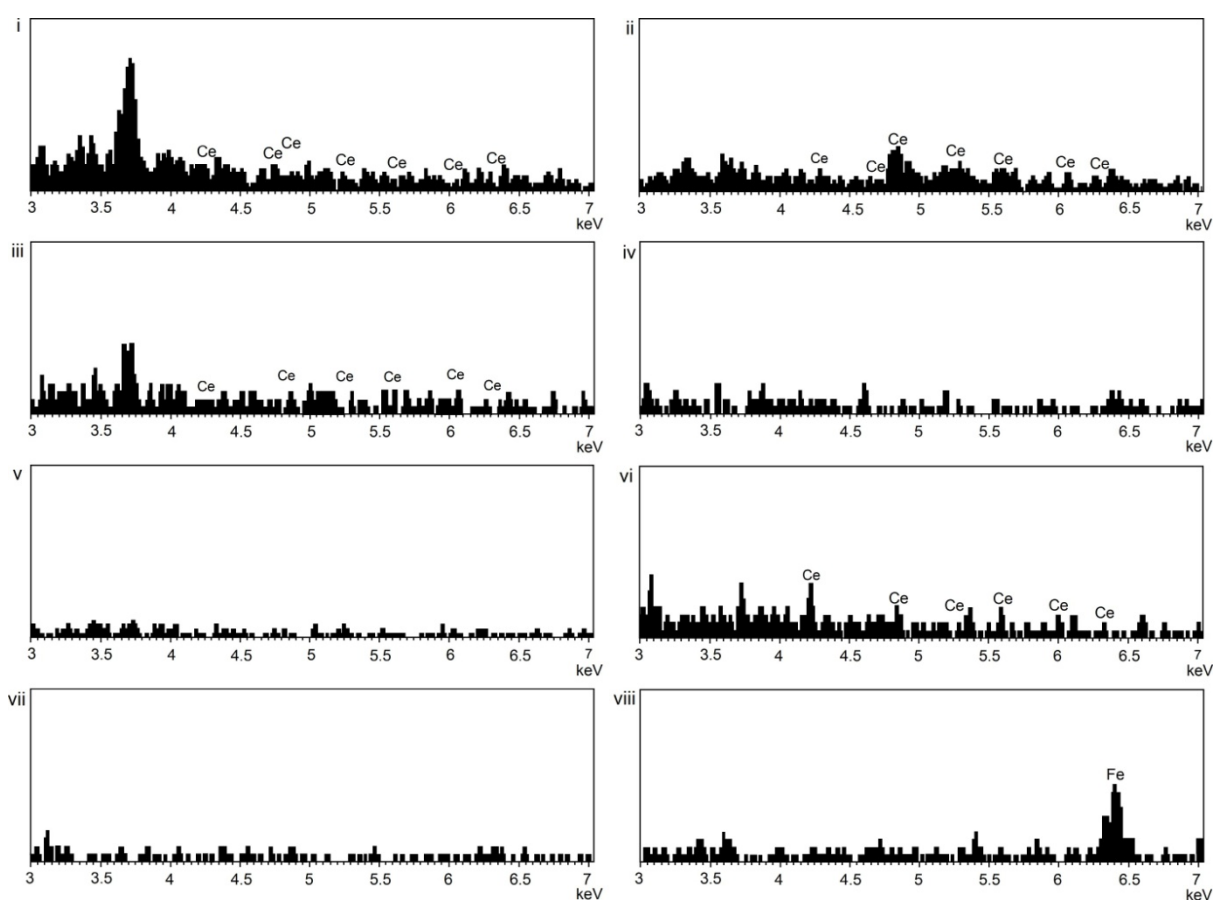

**Figure S1.** Energy dispersive spectra (EDS) corresponding to the arrows in Figure 4 following exposure of algal cells to a high (10000  $\mu\text{g/L}$ ) dose of ceria NPs (i and ii), a low dose (80  $\mu\text{g/L}$ ) of ceria NPs (iii and iv), bulk ceria (10000  $\mu\text{g/L}$ ) (v and vi), and unexposed control cells (no added cerium, vii and viii). Panels (i), (iii), (v) and (vii) show spectra collected from within the vesicles, indicating that the cells internalise and concentrate the cerium within the vesicles following ceria NP exposure but not following bulk or control exposures. Panels (ii), (iv), (vi) and (viii) show spectra collected from electron dense areas surrounding the cells indicating that ceria NPs are found within the media of the high dose exposure, that large aggregates can be identified on the cell surface in the bulk exposure, but no trace of cerium can be found in the low dose or control exposures.

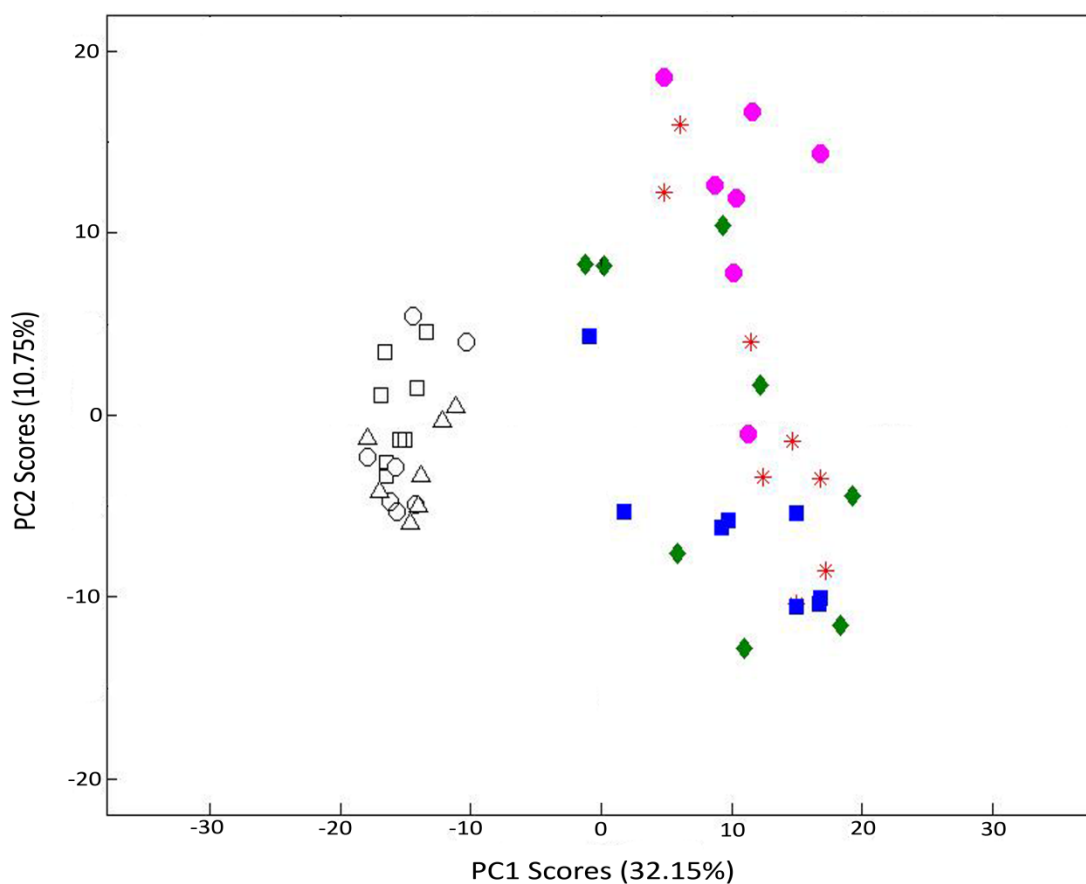

**Figure S2.** PCA scores plot from analysis of the FT-ICR mass spectra from *C. reinhardtii* exposed to supra-environmental concentrations of ceria NPs. Polar algal extracts were analysed in negative ion mode, each in triplicate: control (○), 10000µg/L bulk ceria (□), 1µg/L ionic Ce (△), 10,000µg/L ceria NPs (■), 2000µg/L ceria NPs (◆), 400µg/L ceria NPs (\*), and 80µg/L ceria NPs (●). ANOVA (with Tukeys post-hoc test) of the PC scores identified a significant difference between all control sample classes (unexposed, bulk and ionic) and all ceria NP-exposed samples along the PC1 axis (p-value:  $1.48 \times 10^{-20}$ ), with no significant differences within these two groups.



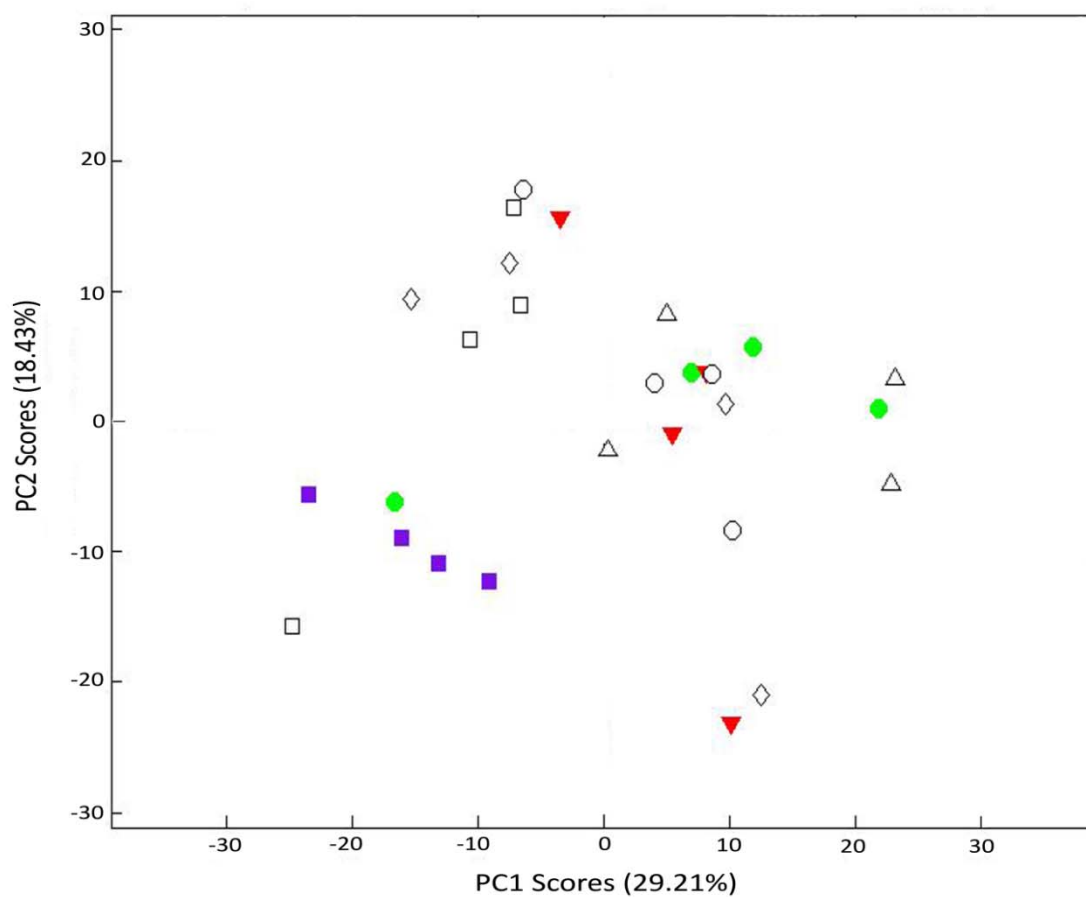

**Figure S3.** PCA scores plot from analysis of the FT-ICR mass spectra from *C. reinhardtii* exposed to predicted environmental concentrations of ceria NPs. Polar algal extracts were analysed in negative ion mode, each in triplicate: control (○), 10000µg/L bulk ceria (□), 1µg/L ionic Ce (△), 1.94mg/L free PVP (◇), 0.72µg/L ceria NPs (■), 0.144µg/L ceria NPs (▼) and 0.029µg/L ceria NPs (●). ANOVA of the PC scores did not identify any significant differences between sample classes.

**TABLE S1. KEGG pathway enrichment analysis of the transcriptomic and metabolomic changes elicited in *C. reinhardtii* in response to 10,000µg/L ceria NPs.<sup>a</sup>**

| KEGG Pathways                               | Transcript Enrichment |                 |           | Metabolite enrichment |                 |           | Combined |          |
|---------------------------------------------|-----------------------|-----------------|-----------|-----------------------|-----------------|-----------|----------|----------|
|                                             | Hits                  | q-value         | Direction | Hits                  | q-value         | Direction | Hits     | Score    |
| Tyrosine metabolism                         | 4                     | 1.64E-01        | ↘         | 2                     | <b>1.56E-05</b> | ↑         | 6        | 2.55E-06 |
| Pantothenate and CoA biosynthesis           | 1                     | 7.59E-01        | ↓         | 2                     | <b>1.56E-05</b> | ↗         | 3        | 1.18E-05 |
| Valine, leucine and isoleucine biosynthesis | 1                     | 7.76E-01        | ↓         | 9                     | <b>1.56E-05</b> | ↗         | 10       | 1.21E-05 |
| Purine metabolism                           | 9                     | 7.87E-01        | ↘         | 3                     | <b>1.56E-05</b> | ↗         | 12       | 1.22E-05 |
| Photosynthesis                              | 9                     | <b>1.37E-05</b> | ↓         | ND                    | ND              | ND        | 9        | 1.37E-05 |
| Pyruvate metabolism                         | 3                     | 6.39E-01        | ↓         | 3                     | <b>3.95E-05</b> | ↑         | 6        | 2.52E-05 |
| Pyrimidine metabolism                       | 1                     | 9.95E-01        | ↑         | 2                     | <b>3.31E-05</b> | ↓         | 3        | 3.29E-05 |
| Porphyrin and chlorophyll metabolism        | 5                     | 2.31E-01        | ↘         | 2                     | <b>1.63E-04</b> | ↑         | 7        | 3.77E-05 |
| Lysine degradation                          | 4                     | <b>7.76E-02</b> | ↗         | 2                     | <b>5.23E-04</b> | –         | 6        | 4.06E-05 |
| Fatty acid biosynthesis                     | 4                     | <b>1.87E-02</b> | ↓         | 2                     | <b>2.48E-03</b> | ↑         | 6        | 4.63E-05 |

|                                             |    |                 |    |    |                 |    |   |          |
|---------------------------------------------|----|-----------------|----|----|-----------------|----|---|----------|
| Glyoxylate and dicarboxylate metabolism     | 4  | 1.24E-01        | ↓  | 3  | <b>6.87E-04</b> | ↓  | 7 | 8.50E-05 |
| Isoquinoline alkaloid biosynthesis          | 2  | <b>2.79E-02</b> | -  | 1  | <b>3.43E-03</b> | ↑  | 3 | 9.59E-05 |
| Glutathione metabolism                      | 6  | <b>2.36E-02</b> | ↘  | 1  | <b>4.58E-03</b> | ↑  | 7 | 1.08E-04 |
| Riboflavin metabolism                       | 2  | 2.11E-01        | ↓  | 2  | <b>6.87E-04</b> | -  | 4 | 1.45E-04 |
| Carbon fixation in photosynthetic organisms | 4  | 2.89E-01        | ↓  | 2  | <b>6.87E-04</b> | ↓  | 6 | 1.99E-04 |
| Glycine, serine and threonine metabolism    | 1  | 8.78E-01        | ↑  | 5  | <b>5.23E-04</b> | ↓  | 6 | 4.59E-04 |
| Glycerolipid metabolism                     | 1  | 7.93E-01        | ↓  | 3  | <b>9.03E-04</b> | ↑  | 4 | 7.15E-04 |
| Aminoacyl-tRNA biosynthesis                 | 1  | 9.10E-01        | ↓  | 3  | <b>9.58E-04</b> | ↘  | 4 | 8.71E-04 |
| Glycolysis or Gluconeogenesis               | ND | ND              | ND | 3  | <b>9.03E-04</b> | ↘  | 3 | 9.03E-04 |
| Fructose and mannose metabolism             | 2  | 5.68E-01        | -  | 2  | <b>1.77E-03</b> | ↑  | 4 | 1.00E-03 |
| Galactose metabolism                        | 1  | 7.20E-01        | ↓  | 2  | <b>1.77E-03</b> | ↑  | 3 | 1.27E-03 |
| Photosynthesis -                            | 5  | <b>1.43E-03</b> | ↓  | ND | ND              | ND | 5 | 1.43E-03 |

|                                          |    |                 |    |    |                 |    |    |          |
|------------------------------------------|----|-----------------|----|----|-----------------|----|----|----------|
| antenna proteins                         |    |                 |    |    |                 |    |    |          |
| Pentose and glucuronate interconversions | 1  | 4.89E-01        | ↓  | 2  | <b>3.43E-03</b> | ↑  | 3  | 1.68E-03 |
| Arginine and proline metabolism          | 4  | 5.36E-01        | ↘  | 6  | <b>3.43E-03</b> | ↑  | 10 | 1.84E-03 |
| Phenylalanine metabolism                 | 5  | <b>2.10E-03</b> | ↘  | ND | ND              | ND | 5  | 2.10E-03 |
| Steroid biosynthesis                     | ND | ND              | ND | 3  | <b>4.05E-03</b> | ↓  | 3  | 4.05E-03 |
| Biotin metabolism                        | 4  | <b>1.87E-02</b> | –  | ND | ND              | ND | 4  | 1.87E-02 |
| Oxidative phosphorylation                | 8  | <b>4.76E-02</b> | ↘  | ND | ND              | ND | 8  | 4.76E-02 |
| Ascorbate and aldarate metabolism        | 3  | <b>4.94E-02</b> | ↓  | ND | ND              | ND | 3  | 4.94E-02 |
| Tryptophan metabolism                    | 3  | <b>4.94E-02</b> | ↘  | ND | ND              | ND | 3  | 4.94E-02 |

<sup>a</sup> Transcriptomic changes are derived from Algal Functional Annotation Tool and metabolomic changes are derived from Met-PA. Hits show the number of pathway members in the Test Set (gene transcripts differentially expressed in algal cells following a 72-hour exposure to 10000µg/L ceria NPs, SAM,  $q < 0.05$ ). q-values denote false discovery rate corrected p-values for enrichment compared with a background of all identified transcripts or metabolites. Arrows indicate the direction of molecular perturbation with a consistent increase in concentration shown as ↑, a consistent decrease as ↓, a majority increase as ↗ and a majority decrease as ↘. Significant pathway enrichments with  $q < 0.05$  are shown in bold; ND denotes no enrichment detected. The combined score was generated by multiplying the q-values for both 'omics approaches and is used for the overall ranking of the pathways.

**TABLE S2. Putative metabolite annotation of the significantly changing peaks detected in the mass spectra of the polar extracts of *C. reinhardtii* following exposure to 10,000µg/L ceria NPs.**

| Observed  |                                | Statistics           |                          | Identification    |            |                                    |                               |                                                    |
|-----------|--------------------------------|----------------------|--------------------------|-------------------|------------|------------------------------------|-------------------------------|----------------------------------------------------|
| m/z       | Average intensity <sup>a</sup> | q-value <sup>b</sup> | Fold change <sup>c</sup> | Empirical formula | Ion form   | Theoretical mass (Da) <sup>d</sup> | Mass error (ppm) <sup>e</sup> | Putative metabolite name(s) <sup>f</sup>           |
| 101.06080 | 30873.77                       | 0.005                | 0.554219                 | C5H10O2           | [M-H]-     | 101.0608                           | -0.04                         | ['3-Methylbutanoic acid']                          |
| 106.01937 | 12067.65                       | 0.002                | 1.916562                 | 0                 |            |                                    |                               | 0                                                  |
| 107.01574 | 43308.76                       | 0.000                | 2.126308                 | 0                 |            |                                    |                               | 0                                                  |
| 115.07649 | 105222.5                       | 0.020                | 0.642291                 | 0                 |            |                                    |                               | 0                                                  |
| 116.07985 | 8818.179                       | 0.007                | 0.633818                 | 0                 |            |                                    |                               | 0                                                  |
| 118.05102 | 12166.65                       | 0.034                | 0.633111                 | C4H9NO3           | [M-H]-     | 118.051                            | 0.44                          | ['L-Allothreonine', 'L-Homoserine', 'L-Threonine'] |
| 122.00956 | 23351.07                       | 0.012                | 2.046954                 | HNO3              | [M+Hac-H]- | 122.0095                           | 0.51                          | ['Nitrate']                                        |
| 123.00959 | 37831.25                       | 0.010                | 4.30716                  | 0                 |            |                                    |                               | 0                                                  |
| 124.00597 | 149721                         | 0.012                | 4.530747                 | 0                 |            |                                    |                               | 0                                                  |

|           |          |       |          |         |             |          |      |                                                                                                                  |
|-----------|----------|-------|----------|---------|-------------|----------|------|------------------------------------------------------------------------------------------------------------------|
| 125.00121 | 11636.75 | 0.023 | 7.798644 | C3H6O3  | [M+Cl]-     | 125.0011 | 0.91 | ['(R)-Lactate', '(S)-Lactate', '3-Hydroxypropanoate', 'D-Glyceraldehyde', 'Glycerone']                           |
| 125.00121 | 11636.75 | 0.023 | 7.798644 | C4H8O2  | [M+K-2H]-   | 125.001  | 1.39 | ['(R)-Acetoin', 'Butanoic acid']                                                                                 |
| 125.06089 | 27196.78 | 0.000 | 0.328721 | 0       |             |          |      | 0                                                                                                                |
| 127.00049 | 9292.715 | 0.040 | 1.237452 | 0       |             |          |      | 0                                                                                                                |
| 127.00135 | 993526.4 | 0.014 | 1.305243 | C3H6O4  | [M+Na-2H]-  | 127.0013 | 0.56 | ['D-Glycerate']                                                                                                  |
| 127.01683 | 53567.11 | 0.045 | 3.803953 | C3H8O3  | [M+Cl]-     | 127.0167 | 0.66 | ['Glycerol']                                                                                                     |
| 127.01683 | 53567.11 | 0.045 | 3.803953 | C4H10O2 | [M+K-2H]-   | 127.0167 | 1.13 | ['(R,R)-Butane-2,3-diol', '(S,S)-Butane-2,3-diol']                                                               |
| 128.00472 | 33995.99 | 0.012 | 1.397677 | 0       |             |          |      | 0                                                                                                                |
| 128.03540 | 181704.2 | 0.046 | 3.950371 | C5H7NO3 | [M-H]-      | 128.0353 | 0.64 | ['1-Pyrroline-4-hydroxy-2-carboxylate', '4-Oxoproline', '5-Oxoproline', 'L-1-Pyrroline-3-hydroxy-5-carboxylate'] |
| 128.04018 | 152351.1 | 0.037 | 4.618801 | 0       |             |          |      | 0                                                                                                                |
| 129.01389 | 18687.5  | 0.045 | 3.739633 | C3H8O3  | [M+(37Cl)]- | 129.0138 | 0.72 | ['Glycerol']                                                                                                     |
| 129.01943 | 16694.17 | 0.007 | 2.159602 | C3H2O2  | [M+Hac-H]-  | 129.0193 | 0.75 | ['Propynoate']                                                                                                   |

|           |          |       |          |         |            |          |      |                                                                                                                                                                                                                  |
|-----------|----------|-------|----------|---------|------------|----------|------|------------------------------------------------------------------------------------------------------------------------------------------------------------------------------------------------------------------|
| 129.01943 | 16694.17 | 0.007 | 2.159602 | C5H6O4  | [M-H]-     | 129.0193 | 0.75 | ['2,5-Dioxopentanoate', '2-Methylmaleate',<br>'4,5-Dioxopentanoate', 'Itaconate',<br>'Mesaconate']                                                                                                               |
| 129.03655 | 470067.7 | 0.036 | 4.824628 | 0       |            |          |      | 0                                                                                                                                                                                                                |
| 130.05106 | 13411.74 | 0.002 | 3.143455 | C5H9NO3 | [M-H]-     | 130.051  | 0.71 | ['(S)-4-Amino-5-oxopentanoate', '5-Amino-<br>2-oxopentanoic acid', '5-Aminolevulinate',<br>'L-Glutamate 5-semialdehyde', 'N-Acetyl-<br>beta-alanine', 'cis-4-Hydroxy-D-proline',<br>'trans-4-Hydroxy-L-proline'] |
| 131.07147 | 34166.84 | 0.014 | 0.793074 | C4H8O   | [M+Hac-H]- | 131.0714 | 0.77 | ['Butanal']                                                                                                                                                                                                      |
| 133.01435 | 45910.48 | 0.040 | 0.721393 | C2H2O3  | [M+Hac-H]- | 133.0142 | 0.76 | ['Glyoxylate']                                                                                                                                                                                                   |
| 133.01435 | 45910.48 | 0.040 | 0.721393 | C4H6O5  | [M-H]-     | 133.0142 | 0.76 | ['(R)-Malate', '(S)-Malate', '3-Dehydro-L-<br>threonate']                                                                                                                                                        |
| 133.01568 | 51056.12 | 0.002 | 5.528595 | 0       |            |          |      | 0                                                                                                                                                                                                                |
| 133.03148 | 31051.46 | 0.025 | 3.696145 | 0       |            |          |      | 0                                                                                                                                                                                                                |
| 134.04733 | 83219.52 | 0.000 | 0.321791 | C5H5N5  | [M-H]-     | 134.0472 | 0.83 | ['Adenine']                                                                                                                                                                                                      |
| 134.05077 | 161904.5 | 0.002 | 1.885636 | 0       |            |          |      | 0                                                                                                                                                                                                                |

|           |          |       |          |          |            |          |      |                                                                                                                                                    |
|-----------|----------|-------|----------|----------|------------|----------|------|----------------------------------------------------------------------------------------------------------------------------------------------------|
| 135.04527 | 51830.54 | 0.000 | 1.970527 | C8H8O2   | [M-H]-     | 135.0452 | 0.86 | ['3-Vinylcatechol', '4-Hydroxyacetophenone', '4-Hydroxyphenylacetaldehyde', 'Phenylacetic acid', 'Toluate', 'm-Methylbenzoate', 'o-Toluate']       |
| 135.04713 | 504412.9 | 0.002 | 2.020203 | 0        |            |          |      | 0                                                                                                                                                  |
| 136.04863 | 4869.502 | 0.033 | 2.568085 | 0        |            |          |      | 0                                                                                                                                                  |
| 136.05050 | 11362.58 | 0.007 | 2.116039 | 0        |            |          |      | 0                                                                                                                                                  |
| 143.07152 | 41916.62 | 0.042 | 1.177413 | 0        |            |          |      | 0                                                                                                                                                  |
| 143.99159 | 50679.44 | 0.027 | 1.921153 | 0        |            |          |      | 0                                                                                                                                                  |
| 144.06676 | 13915.23 | 0.011 | 4.554482 | C6H11NO3 | [M-H]-     | 144.0666 | 0.99 | ['(S)-5-Amino-3-oxohexanoic acid', '2-Amino-5-oxohexanoate', '4-Acetamidobutanoate', '6-Amino-2-oxohexanoate', 'L-2-Amino adipate 6-semialdehyde'] |
| 145.05078 | 16716.52 | 0.007 | 1.407145 | C4H6O2   | [M+Hac-H]- | 145.0506 | 1.01 | ['Diacetyl']                                                                                                                                       |
| 145.05078 | 16716.52 | 0.007 | 1.407145 | C6H10O4  | [M-H]-     | 145.0506 | 1.01 | ['(R)-3-Hydroxy-3-methyl-2-oxopentanoate', '(R)-4-Dehydropantoate', '(S)-2-Aceto-2-                                                                |



|           |          |       |          |           |                |          |      |                                                                                                                                 |
|-----------|----------|-------|----------|-----------|----------------|----------|------|---------------------------------------------------------------------------------------------------------------------------------|
|           |          |       |          |           |                |          |      | hydroxybutanoate', '2-Dehydropantoate',<br>'4-Hydroxy-2-oxohexanoic acid', 'Adipate']                                           |
| 145.08717 | 30236.98 | 0.026 | 1.223963 | 0         |                |          |      | 0                                                                                                                               |
| 145.09841 | 20850.02 | 0.033 | 0.679907 | C6H14N2O2 | [M-H]-         | 145.0983 | 1.09 | ['(3S)-3,6-Diaminohexanoate', '(3S,5S)-3,5-<br>Diaminohexanoate', '2,5-<br>Diaminohexanoate', 'D-Lysine', 'L-Lysine']           |
| 147.04719 | 21792.38 | 0.041 | 3.724082 | 0         |                |          |      | 0                                                                                                                               |
| 150.04231 | 337081.4 | 0.000 | 8.778464 | C5H5N5O   | [M-H]-         | 150.0421 | 1.18 | ['Guanine']                                                                                                                     |
| 151.04567 | 19689.98 | 0.036 | 6.99551  | 0         |                |          |      | 0                                                                                                                               |
| 158.98900 | 21554.73 | 0.025 | 1.894868 | 0         |                |          |      | 0                                                                                                                               |
| 160.06632 | 103398.1 | 0.020 | 6.863768 | 0         |                |          |      | 0                                                                                                                               |
| 161.06268 | 461675.7 | 0.023 | 7.638953 | 0         |                |          |      | 0                                                                                                                               |
| 162.97779 | 152196   | 0.007 | 1.794965 | 0         |                |          |      | 0                                                                                                                               |
| 169.01739 | 76278.74 | 0.002 | 2.447252 | 0         |                |          |      | 0                                                                                                                               |
| 171.02750 | 46142.5  | 0.037 | 6.528302 | C5H10O5   | [M+Na-<br>2H]- | 171.0275 | 0.04 | ['D-Lyxose', 'D-Ribose', 'D-Ribulose', 'D-<br>Xylose', 'D-Xylulose', 'L-Arabinose', 'L-<br>Lyxose', 'L-Ribulose', 'L-Xylulose'] |
| 171.04181 | 143743.2 | 0.025 | 4.84874  | 0         |                |          |      | 0                                                                                                                               |

|           |          |       |          |          |            |          |       |                                                                                                                                              |
|-----------|----------|-------|----------|----------|------------|----------|-------|----------------------------------------------------------------------------------------------------------------------------------------------|
| 171.10267 | 19974.7  | 0.007 | 2.075481 | C9H16O3  | [M-H]-     | 171.1027 | 0.01  | ['9-Oxononanoic acid']                                                                                                                       |
| 171.13905 | 94920.1  | 0.001 | 1.816465 | C10H20O2 | [M-H]-     | 171.1391 | -0.02 | ['Decanoic acid']                                                                                                                            |
| 175.07241 | 23558.65 | 0.002 | 3.258927 | 0        |            |          |       | 0                                                                                                                                            |
| 180.06659 | 10135.61 | 0.030 | 1.545147 | C9H11NO3 | [M-H]-     | 180.0666 | -0.15 | ['3-Amino-3-(4-hydroxyphenyl)propanoate',<br>'L-Tyrosine']                                                                                   |
| 181.07094 | 102350.4 | 0.001 | 6.90273  | 0        |            |          |       | 0                                                                                                                                            |
| 181.07174 | 496771.2 | 0.021 | 8.142082 | C6H14O6  | [M-H]-     | 181.0718 | -0.13 | ['D-Sorbitol', 'Galactitol', 'Mannitol']                                                                                                     |
| 194.09373 | 25572.91 | 0.002 | 0.475613 | 0        |            |          |       | 0                                                                                                                                            |
| 194.98878 | 32394.24 | 0.013 | 2.049982 | 0        |            |          |       | 0                                                                                                                                            |
| 195.06633 | 24089.82 | 0.024 | 1.530928 | C10H12O4 | [M-H]-     | 195.0663 | 0.24  | ['5-Hydroxyconiferyl alcohol']                                                                                                               |
| 195.06633 | 24089.82 | 0.024 | 1.530928 | C8H8O2   | [M+Hac-H]- | 195.0663 | 0.24  | ['3-Vinylcatechol', '4-Hydroxyacetophenone', '4-Hydroxyphenylacetaldehyde', 'Phenylacetic acid', 'Toluene', 'm-Methylbenzoate', 'o-Toluene'] |
| 195.06817 | 10184.87 | 0.030 | 0.342329 | 0        |            |          |       | 0                                                                                                                                            |
| 195.08041 | 9003.352 | 0.012 | 0.385506 | 0        |            |          |       | 0                                                                                                                                            |
| 195.08091 | 11434.34 | 0.012 | 0.493433 | 0        |            |          |       | 0                                                                                                                                            |

|           |          |       |          |          |                |          |       |                                                                                            |
|-----------|----------|-------|----------|----------|----------------|----------|-------|--------------------------------------------------------------------------------------------|
| 195.08278 | 33344.7  | 0.007 | 0.488406 | 0        |                |          |       | 0                                                                                          |
| 195.08328 | 41396.65 | 0.019 | 0.59062  | 0        |                |          |       | 0                                                                                          |
| 195.08708 | 1.2E+08  | 0.020 | 0.696022 | 0        |                |          |       | 0                                                                                          |
| 195.09144 | 29076.72 | 0.018 | 0.488304 | 0        |                |          |       | 0                                                                                          |
| 195.09195 | 22527.32 | 0.012 | 0.46541  | 0        |                |          |       | 0                                                                                          |
| 196.09065 | 5311906  | 0.007 | 0.722561 | 0        |                |          |       | 0                                                                                          |
| 197.04298 | 28407.8  | 0.007 | 2.227069 | C7H12O5  | [M+Na-<br>2H]- | 197.0431 | -0.83 | ['(2R,3S)-3-Isopropylmalate', '2-Propylmalate', '3-Propylmalate', 'alpha-Isopropylmalate'] |
| 197.09016 | 12825.03 | 0.043 | 0.636569 | 0        |                |          |       | 0                                                                                          |
| 197.09168 | 793446.9 | 0.001 | 0.541202 | 0        |                |          |       | 0                                                                                          |
| 197.09412 | 157673.7 | 0.001 | 0.61381  | 0        |                |          |       | 0                                                                                          |
| 198.09505 | 57560.42 | 0.002 | 0.598494 | 0        |                |          |       | 0                                                                                          |
| 199.05899 | 19204.86 | 0.009 | 2.336553 | 0        |                |          |       | 0                                                                                          |
| 199.06535 | 237634.2 | 0.025 | 2.344363 | 0        |                |          |       | 0                                                                                          |
| 200.06623 | 68526.14 | 0.028 | 2.349185 | C10H13NO | [M+(37Cl)]-    | 200.0662 | 0.32  | ['(R)-2-Methylimino-1-phenylpropan-1-ol']                                                  |
| 201.11328 | 39973.01 | 0.023 | 1.266359 | 0        |                |          |       | 0                                                                                          |
| 202.10851 | 40477.23 | 0.017 | 4.019783 | 0        |                |          |       | 0                                                                                          |

|           |          |       |          |          |                |          |      |                                                                                                                                                                                                                                                                     |
|-----------|----------|-------|----------|----------|----------------|----------|------|---------------------------------------------------------------------------------------------------------------------------------------------------------------------------------------------------------------------------------------------------------------------|
| 204.12417 | 194549   | 0.020 | 0.478965 | C9H19NO4 | [M-H]-         | 204.1241 | 0.18 | ['Pantothenol']                                                                                                                                                                                                                                                     |
| 206.07183 | 26525.99 | 0.010 | 2.837502 | 0        |                |          |      | 0                                                                                                                                                                                                                                                                   |
| 206.10343 | 10356.26 | 0.040 | 2.222161 | 0        |                |          |      | 0                                                                                                                                                                                                                                                                   |
| 206.96764 | 31387.89 | 0.048 | 0.513623 | C3H7O7P  | [M+Na-<br>2H]- | 206.9676 | 0.14 | ['2-Phospho-D-glycerate', '3-Phospho-D-glycerate']                                                                                                                                                                                                                  |
| 207.05105 | 18245.86 | 0.002 | 1.944437 | C5H8O5   | [M+Hac-H]-     | 207.051  | 0.1  | ['(R)-2-Methylmalate', '(S)-2-Methylmalate', '2-Dehydro-3-deoxy-D-xylonate', '2-Dehydro-3-deoxy-L-arabinonate', '2-Hydroxyglutarate', 'D-Xylonolactone', 'D-erythro-3-Methylmalate', 'D-threo-3-Methylmalate', 'L-Arabinono-1,4-lactone', 'L-threo-3-Methylmalate'] |
| 207.06392 | 10948.02 | 0.025 | 0.367141 | 0        |                |          |      | 0                                                                                                                                                                                                                                                                   |
| 207.06820 | 107658   | 0.009 | 2.879166 | 0        |                |          |      | 0                                                                                                                                                                                                                                                                   |
| 207.08744 | 330446.2 | 0.000 | 0.419149 | C6H12O4  | [M+Hac-H]-     | 207.0874 | 0.13 | ['(R)-2,3-Dihydroxy-3-methylpentanoate', '(R)-Mevalonate', '(R)-Pantoate']                                                                                                                                                                                          |
| 208.07447 | 16500.64 | 0.019 | 3.265773 | C8H15NO3 | [M+Cl]-        | 208.0746 | -0.6 | ['Swainsonine']                                                                                                                                                                                                                                                     |
| 208.09080 | 29208.43 | 0.000 | 0.460788 | 0        |                |          |      | 0                                                                                                                                                                                                                                                                   |

|           |          |       |          |           |                |          |       |                                                                          |
|-----------|----------|-------|----------|-----------|----------------|----------|-------|--------------------------------------------------------------------------|
| 209.00305 | 14327.23 | 0.012 | 1.840601 | 0         |                |          |       | 0                                                                        |
| 209.00436 | 658144.3 | 0.012 | 1.723801 | 0         |                |          |       | 0                                                                        |
| 209.03032 | 46674.11 | 0.022 | 0.383615 | C4H6O6    | [M+Hac-H]-     | 209.0303 | 0.13  | ['(R,R)-Tartaric acid', 'meso-Tartaric acid']                            |
| 209.10310 | 148090.3 | 0.000 | 0.354921 | 0         |                |          |       | 0                                                                        |
| 210.00775 | 33866.26 | 0.019 | 1.683987 | 0         |                |          |       | 0                                                                        |
| 210.03844 | 80262.18 | 0.043 | 9.313115 | C7H11NO5  | [M+Na-<br>2H]- | 210.0384 | 0.23  | ['AminoDHQ', 'L-2-Amino-6-<br>oxoheptanedioate', 'N-Acetyl-L-glutamate'] |
| 210.06325 | 1120700  | 0.000 | 9.656773 | C5H5N5O   | [M+Hac-H]-     | 210.0633 | -0.06 | ['Guanine']                                                              |
| 210.10644 | 13343.04 | 0.000 | 0.35914  | 0         |                |          |       | 0                                                                        |
| 210.96263 | 21812.29 | 0.025 | 1.337578 | 0         |                |          |       | 0                                                                        |
| 211.04914 | 44724.8  | 0.041 | 5.741316 | C7H14N2O3 | [M+K-2H]-      | 211.049  | 0.43  | ['N-Acetylorcarnithine']                                                 |
| 211.06666 | 74397.41 | 0.009 | 6.337529 | C7H14N2O3 | [M+(37Cl)]-    | 211.0669 | -1.11 | ['N-Acetylorcarnithine']                                                 |
| 213.01216 | 14687.62 | 0.030 | 1.869251 | 0         |                |          |       | 0                                                                        |
| 213.05209 | 9498.671 | 0.046 | 0.276794 | C6H6N2O3  | [M+Hac-H]-     | 213.0517 | 1.85  | ['Imidazol-5-yl-pyruvate']                                               |
| 213.05353 | 410477.9 | 0.002 | 0.241493 | 0         |                |          |       | 0                                                                        |
| 214.05689 | 29305.62 | 0.003 | 0.289547 | 0         |                |          |       | 0                                                                        |
| 214.94951 | 133315.4 | 0.048 | 2.388955 | 0         |                |          |       | 0                                                                        |
| 214.99243 | 149122.6 | 0.031 | 6.534752 | 0         |                |          |       | 0                                                                        |

|           |          |       |          |          |                |          |       |                                                                                |
|-----------|----------|-------|----------|----------|----------------|----------|-------|--------------------------------------------------------------------------------|
| 215.05060 | 112775.1 | 0.002 | 0.251586 | 0        |                |          |       | 0                                                                              |
| 215.12890 | 17366.19 | 0.036 | 1.324041 | 0        |                |          |       | 0                                                                              |
| 216.94658 | 34360.69 | 0.015 | 2.230875 | 0        |                |          |       | 0                                                                              |
| 216.99042 | 118752.1 | 0.036 | 6.527365 | 0        |                |          |       | 0                                                                              |
| 218.10342 | 16818.62 | 0.027 | 3.475418 | C9H17NO5 | [M-H]-         | 218.1034 | 0.1   | ['Pantothenate']                                                               |
| 218.10342 | 16818.62 | 0.027 | 3.475418 | C7H13NO3 | [M+Hac-H]-     | 218.1034 | 0.1   | ['5-Acetamidopentanoate', 'Calystegin A3']                                     |
| 221.10308 | 52837.1  | 0.005 | 0.351009 | 0        |                |          |       | 0                                                                              |
| 230.13970 | 16640.41 | 0.043 | 1.490469 | 0        |                |          |       | 0                                                                              |
| 232.04512 | 101730.3 | 0.001 | 6.687574 | 0        |                |          |       | 0                                                                              |
| 232.08737 | 27714.42 | 0.043 | 4.114087 | 0        |                |          |       | 0                                                                              |
| 235.09351 | 71972.22 | 0.043 | 2.673723 | 0        |                |          |       | 0                                                                              |
| 236.91023 | 13568.8  | 0.009 | 2.715028 | 0        |                |          |       | 0                                                                              |
| 237.09789 | 91157.76 | 0.050 | 0.110461 | 0        |                |          |       | 0                                                                              |
| 237.13428 | 64291.55 | 0.001 | 0.288764 | 0        |                |          |       | 0                                                                              |
| 242.00705 | 222874.6 | 0.047 | 2.388989 | C10H7NO5 | [M+Na-<br>2H]- | 242.0071 | -0.18 | ['7,8-Dihydroxykynureate']                                                     |
| 243.02747 | 13930.42 | 0.042 | 0.436293 | C6H13O8P | [M-H]-         | 243.0275 | -0.25 | ['L-Fucose 1-phosphate', 'L-Fuculose 1-phosphate', 'L-Rhamnulose 1-phosphate'] |

|           |          |       |          |          |                |          |       |                                            |
|-----------|----------|-------|----------|----------|----------------|----------|-------|--------------------------------------------|
| 243.02747 | 13930.42 | 0.042 | 0.436293 | C4H9O6P  | [M+Hac-H]-     | 243.0275 | -0.25 | ['L-3,4-Dihydroxybutan-2-one 4-phosphate'] |
| 243.02747 | 13930.42 | 0.042 | 0.436293 | C11H10O5 | [M+Na-<br>2H]- | 243.0275 | -0.1  | ['2-Succinylbenzoate']                     |
| 243.06564 | 41538.53 | 0.046 | 2.466848 | 0        |                |          |       | 0                                          |
| 246.07470 | 26007.7  | 0.013 | 0.692404 | 0        |                |          |       | 0                                          |
| 247.04377 | 289347.4 | 0.025 | 3.504037 | 0        |                |          |       | 0                                          |
| 247.11864 | 32203.92 | 0.031 | 0.764237 | 0        |                |          |       | 0                                          |
| 248.01902 | 53903.16 | 0.000 | 6.599916 | 0        |                |          |       | 0                                          |
| 250.16594 | 171950.7 | 0.002 | 1.890207 | 0        |                |          |       | 0                                          |
| 251.14995 | 224983   | 0.000 | 0.274976 | 0        |                |          |       | 0                                          |
| 251.16928 | 20770.07 | 0.007 | 1.782244 | 0        |                |          |       | 0                                          |
| 252.14519 | 68254.85 | 0.002 | 0.446779 | 0        |                |          |       | 0                                          |
| 252.15328 | 28899.13 | 0.005 | 0.353457 | 0        |                |          |       | 0                                          |
| 252.99412 | 10659.27 | 0.041 | 1.719025 | 0        |                |          |       | 0                                          |
| 253.03050 | 81187.8  | 0.050 | 2.914994 | 0        |                |          |       | 0                                          |
| 254.00599 | 36147.59 | 0.033 | 5.55626  | 0        |                |          |       | 0                                          |
| 254.12445 | 38329    | 0.005 | 0.46297  | 0        |                |          |       | 0                                          |
| 255.23101 | 127422.2 | 0.031 | 1.519548 | 0        |                |          |       | 0                                          |

|           |          |       |          |           |                |          |       |                                    |
|-----------|----------|-------|----------|-----------|----------------|----------|-------|------------------------------------|
| 258.13462 | 10598.41 | 0.027 | 2.462186 | C10H17NO3 | [M+Hac-H]-     | 258.1347 | -0.3  | ['Ecgonine methyl ester']          |
| 259.13698 | 43988.62 | 0.007 | 2.028055 | 0         |                |          |       | 0                                  |
| 261.05910 | 51406.24 | 0.035 | 0.418581 | 0         |                |          |       | 0                                  |
| 261.13430 | 67006.42 | 0.000 | 0.398177 | 0         |                |          |       | 0                                  |
| 261.13741 | 52314.38 | 0.028 | 11.56825 | C13H24N2O | [M+K-2H]-      | 261.1375 | -0.23 | ['Anapheline', 'Cuscohygrine']     |
| 262.04858 | 11838.22 | 0.033 | 0.754668 | C10H13NO5 | [M+Cl]-        | 262.0488 | -0.75 | ['L-Arogenate']                    |
| 262.04858 | 11838.22 | 0.033 | 0.754668 | C14H11NO3 | [M+Na-<br>2H]- | 262.0486 | 0.07  | ['1,3-Dihydroxy-N-methylacridone'] |
| 262.95282 | 26036.05 | 0.034 | 0.561716 | 0         |                |          |       | 0                                  |
| 263.14992 | 17158.54 | 0.019 | 0.546253 | 0         |                |          |       | 0                                  |
| 264.10881 | 62573.94 | 0.040 | 4.086474 | 0         |                |          |       | 0                                  |
| 264.11358 | 167548.2 | 0.018 | 2.696031 | 0         |                |          |       | 0                                  |
| 264.14518 | 133340.5 | 0.002 | 0.268863 | C9H19NO4  | [M+Hac-H]-     | 264.1453 | -0.31 | ['Pantothenol']                    |
| 265.10994 | 586610.7 | 0.021 | 2.670175 | 0         |                |          |       | 0                                  |
| 265.11688 | 23703.76 | 0.034 | 4.961067 | 0         |                |          |       | 0                                  |
| 265.12920 | 57396.9  | 0.013 | 0.596789 | 0         |                |          |       | 0                                  |
| 266.00473 | 35571.79 | 0.011 | 0.562049 | 0         |                |          |       | 0                                  |
| 266.11328 | 76585.66 | 0.027 | 5.303706 | 0         |                |          |       | 0                                  |



|           |          |       |          |            |             |          |       |                   |
|-----------|----------|-------|----------|------------|-------------|----------|-------|-------------------|
| 266.16084 | 128937.5 | 0.000 | 0.38977  | 0          |             |          |       | 0                 |
| 267.10848 | 31495.09 | 0.023 | 0.475203 | 0          |             |          |       | 0                 |
| 267.16417 | 15700.57 | 0.007 | 0.450783 | 0          |             |          |       | 0                 |
| 269.08780 | 21215.64 | 0.043 | 2.818885 | C7H14O7    | [M+Hac-H]-  | 269.0878 | -0.03 | ['Sedoheptulose'] |
| 269.08780 | 21215.64 | 0.043 | 2.818885 | C13H16N2O2 | [M+(37Cl)]- | 269.0876 | 0.63  | ['Melatonin']     |
| 270.00094 | 27572.49 | 0.031 | 4.033076 | 0          |             |          |       | 0                 |
| 270.12073 | 69511.52 | 0.000 | 0.219278 | 0          |             |          |       | 0                 |
| 276.94965 | 67873.11 | 0.044 | 0.585453 | 0          |             |          |       | 0                 |
| 278.22059 | 21780.29 | 0.033 | 0.484564 | 0          |             |          |       | 0                 |
| 281.12162 | 9869.658 | 0.026 | 1.895051 | 0          |             |          |       | 0                 |
| 281.17337 | 17077.39 | 0.050 | 0.730643 | 0          |             |          |       | 0                 |
| 282.93668 | 60618.49 | 0.025 | 0.536672 | 0          |             |          |       | 0                 |
| 298.13941 | 35270.74 | 0.044 | 7.657525 | 0          |             |          |       | 0                 |
| 298.91048 | 32697.21 | 0.034 | 0.571895 | 0          |             |          |       | 0                 |
| 301.23827 | 31644.28 | 0.022 | 1.50498  | 0          |             |          |       | 0                 |
| 306.98124 | 41272.54 | 0.026 | 1.328424 | 0          |             |          |       | 0                 |
| 307.21249 | 25661.22 | 0.007 | 0.660474 | 0          |             |          |       | 0                 |
| 312.96831 | 17810.28 | 0.018 | 2.154808 | 0          |             |          |       | 0                 |

|           |          |       |          |            |            |          |       |                                                  |
|-----------|----------|-------|----------|------------|------------|----------|-------|--------------------------------------------------|
| 313.23831 | 23609.29 | 0.002 | 1.758984 | C18H34O4   | [M-H]-     | 313.2384 | -0.39 | ['12,13-DHOME', '9,10-DHOME']                    |
| 313.23831 | 23609.29 | 0.002 | 1.758984 | C16H30O2   | [M+Hac-H]- | 313.2384 | -0.39 | ['(9Z)-Hexadecenoic acid']                       |
| 314.04816 | 91295.39 | 0.013 | 11.84962 | 0          |            |          |       | 0                                                |
| 315.25395 | 332203.4 | 0.027 | 1.754906 | C16H32O2   | [M+Hac-H]- | 315.2541 | -0.42 | ['Hexadecanoic acid']                            |
| 316.25730 | 72575.73 | 0.035 | 1.687626 | 0          |            |          |       | 0                                                |
| 317.05465 | 24071.02 | 0.020 | 1.605501 | 0          |            |          |       | 0                                                |
| 317.14520 | 420316.9 | 0.003 | 2.142644 | 0          |            |          |       | 0                                                |
| 317.25033 | 48400.76 | 0.002 | 2.343127 | 0          |            |          |       | 0                                                |
| 318.14853 | 52635.76 | 0.007 | 2.050006 | 0          |            |          |       | 0                                                |
| 323.02844 | 98446    | 0.001 | 0.134838 | C9H13N2O9P | [M-H]-     | 323.0286 | -0.48 | ['3-UMP', 'Pseudouridine 5-phosphate',<br>'UMP'] |
| 325.16562 | 16123.04 | 0.000 | 1.955838 | C15H22O4   | [M+Hac-H]- | 325.1657 | -0.13 | ['Xanthoxic acid']                               |
| 326.23356 | 47488.22 | 0.041 | 1.889902 | 0          |            |          |       | 0                                                |
| 327.21760 | 13919.77 | 0.041 | 1.3891   | C18H32O5   | [M-H]-     | 327.2177 | -0.3  | ['2,3-Dinor-8-iso prostaglandin F1alpha']        |
| 329.04675 | 333960.8 | 0.022 | 5.708872 | 0          |            |          |       | 0                                                |
| 331.02016 | 25624.84 | 0.036 | 0.499861 | 0          |            |          |       | 0                                                |
| 331.15337 | 11675.17 | 0.048 | 0.268324 | 0          |            |          |       | 0                                                |
| 331.16084 | 5821712  | 0.012 | 0.289025 | 0          |            |          |       | 0                                                |

|           |          |       |          |           |            |          |      |                                                                                                                                         |
|-----------|----------|-------|----------|-----------|------------|----------|------|-----------------------------------------------------------------------------------------------------------------------------------------|
| 331.22377 | 19654.41 | 0.043 | 2.335481 | 0         |            |          |      | 0                                                                                                                                       |
| 332.16425 | 663745.9 | 0.011 | 0.278188 | 0         |            |          |      | 0                                                                                                                                       |
| 332.23609 | 66338.89 | 0.041 | 3.067825 | 0         |            |          |      | 0                                                                                                                                       |
| 333.02347 | 17989.18 | 0.002 | 0.694154 | C6H11O10P | [M+Hac-H]- | 333.0228 | 1.89 | ['1-Phospho-alpha-D-galacturonate', '3-Dehydro-L-gulonate 6-phosphate', '6-Phospho-2-dehydro-D-gluconate', 'D-Glucuronate 1-phosphate'] |
| 333.16521 | 107904.6 | 0.010 | 0.262135 | 0         |            |          |      | 0                                                                                                                                       |
| 333.23949 | 16444.08 | 0.044 | 2.65673  | 0         |            |          |      | 0                                                                                                                                       |
| 334.20418 | 34627.02 | 0.012 | 3.419776 | 0         |            |          |      | 0                                                                                                                                       |
| 334.98187 | 48520.54 | 0.012 | 0.622182 | 0         |            |          |      | 0                                                                                                                                       |
| 335.01254 | 18000.28 | 0.000 | 0.497865 | 0         |            |          |      | 0                                                                                                                                       |
| 335.24387 | 52501.21 | 0.001 | 0.445466 | 0         |            |          |      | 0                                                                                                                                       |
| 336.03020 | 71474.89 | 0.007 | 7.857722 | 0         |            |          |      | 0                                                                                                                                       |
| 336.97089 | 434801.7 | 0.024 | 0.488314 | 0         |            |          |      | 0                                                                                                                                       |
| 337.10345 | 21658.69 | 0.028 | 0.634258 | 0         |            |          |      | 0                                                                                                                                       |
| 337.97424 | 37909.81 | 0.024 | 0.505985 | 0         |            |          |      | 0                                                                                                                                       |
| 338.96903 | 63891.38 | 0.025 | 0.489913 | 0         |            |          |      | 0                                                                                                                                       |

|           |          |       |          |            |                |          |       |                                                                        |
|-----------|----------|-------|----------|------------|----------------|----------|-------|------------------------------------------------------------------------|
| 339.02712 | 30498.23 | 0.021 | 0.787708 | C15H12O7   | [M+Cl]-        | 339.0277 | -1.73 | ['Pentahydroxyflavanone', 'Taxifolin']                                 |
| 339.02712 | 30498.23 | 0.021 | 0.787708 | C16H14O6   | [M+K-2H]-      | 339.0276 | -1.55 | ['Dihydrokalafungin']                                                  |
| 340.2493  | 66525.71 | 0.046 | 1.995322 | 0          |                |          |       | 0                                                                      |
| 342.95783 | 384937.9 | 0.044 | 0.637668 | 0          |                |          |       | 0                                                                      |
| 343.06232 | 40358.9  | 0.025 | 0.334359 | 0          |                |          |       | 0                                                                      |
| 344.05168 | 8954.303 | 0.044 | 0.517629 | 0          |                |          |       | 0                                                                      |
| 344.95600 | 25848.01 | 0.044 | 0.662248 | 0          |                |          |       | 0                                                                      |
| 345.01052 | 37311.57 | 0.024 | 0.137237 | C9H13N2O9P | [M+Na-<br>2H]- | 345.0105 | -0.06 | ['3-UMP', 'Pseudouridine 5-phosphate',<br>'UMP']                       |
| 345.06970 | 14658.73 | 0.009 | 0.63415  | 0          |                |          |       | 0                                                                      |
| 345.07793 | 23778.38 | 0.025 | 0.614163 | 0          |                |          |       | 0                                                                      |
| 346.29625 | 31508.81 | 0.030 | 0.63781  | 0          |                |          |       | 0                                                                      |
| 352.00416 | 42238.26 | 0.000 | 6.253932 | 0          |                |          |       | 0                                                                      |
| 356.99956 | 12848.51 | 0.017 | 0.445892 | 0          |                |          |       | 0                                                                      |
| 358.85986 | 10275.81 | 0.043 | 0.551457 | 0          |                |          |       | 0                                                                      |
| 359.22048 | 15893    | 0.036 | 0.484055 | C20H34O4   | [M+Na-<br>2H]- | 359.2204 | 0.28  | ['11,12-DHET', '14,15-DHET', '5,6-DHET',<br>'8,9-DHET', 'Aphidicolin'] |
| 360.07151 | 18390.7  | 0.000 | 0.296749 | 0          |                |          |       | 0                                                                      |

|           |          |       |          |             |             |          |      |                                                                              |
|-----------|----------|-------|----------|-------------|-------------|----------|------|------------------------------------------------------------------------------|
| 362.05077 | 20108.6  | 0.043 | 0.21384  | C10H14N5O8P | [M-H]-      | 362.0507 | 0.12 | ['GMP', 'Guanosine 3-phosphate', 'Precursor Z']                              |
| 362.05077 | 20108.6  | 0.043 | 0.21384  | C11H21NO6S2 | [M+Cl]-     | 362.0504 | 0.93 | ['3-Methylthiopropyl-desulfoglucosinolate']                                  |
| 367.21280 | 4350.24  | 0.044 | 2.098926 | C20H32O6    | [M-H]-      | 367.2126 | 0.51 | ['11-Dehydro-thromboxane B2', '6-Keto-prostaglandin E1', 'Prostaglandin G2'] |
| 372.30388 | 6548.387 | 0.011 | 0.249228 | 0           |             |          |      | 0                                                                            |
| 373.01061 | 62341.25 | 0.001 | 2.132947 | 0           |             |          |      | 0                                                                            |
| 374.06951 | 44513.22 | 0.001 | 11.34243 | 0           |             |          |      | 0                                                                            |
| 375.20256 | 14240.8  | 0.013 | 0.583005 | 0           |             |          |      | 0                                                                            |
| 376.21634 | 11998.6  | 0.007 | 3.418642 | 0           |             |          |      | 0                                                                            |
| 378.97657 | 23316.8  | 0.013 | 1.967506 | 0           |             |          |      | 0                                                                            |
| 378.98138 | 12508.15 | 0.040 | 0.551989 | 0           |             |          |      | 0                                                                            |
| 380.28067 | 8580.011 | 0.041 | 0.614527 | 0           |             |          |      | 0                                                                            |
| 380.91375 | 149444.7 | 0.029 | 0.57645  | 0           |             |          |      | 0                                                                            |
| 382.91187 | 20486.07 | 0.030 | 0.564546 | 0           |             |          |      | 0                                                                            |
| 383.19224 | 9437.492 | 0.001 | 0.50751  | C20H30N2O3  | [M+(37Cl)]- | 383.1921 | 0.38 | ['13-(2-Methylcrotonoyl)oxylupanine']                                        |
| 387.00383 | 26549.33 | 0.018 | 0.744522 | 0           |             |          |      | 0                                                                            |
| 388.96335 | 10294.51 | 0.041 | 2.21757  | 0           |             |          |      | 0                                                                            |

|           |          |       |          |              |                |          |       |                           |
|-----------|----------|-------|----------|--------------|----------------|----------|-------|---------------------------|
| 389.00095 | 18494.72 | 0.025 | 0.754746 | C10H13N2O11P | [M+Na-<br>2H]- | 389.0004 | 1.49  | ['Orotidine 5-phosphate'] |
| 389.06802 | 229368.4 | 0.021 | 5.691306 | 0            |                |          |       | 0                         |
| 389.21814 | 47920.13 | 0.008 | 0.67408  | 0            |                |          |       | 0                         |
| 391.04155 | 21919.98 | 0.043 | 0.431156 | 0            |                |          |       | 0                         |
| 392.07058 | 17269.3  | 0.004 | 0.660111 | 0            |                |          |       | 0                         |
| 392.99232 | 11725.5  | 0.036 | 4.092264 | 0            |                |          |       | 0                         |
| 393.02939 | 7243.929 | 0.050 | 0.463244 | 0            |                |          |       | 0                         |
| 394.96663 | 5123.92  | 0.042 | 1.790546 | 0            |                |          |       | 0                         |
| 394.97136 | 33099.07 | 0.007 | 1.907879 | 0            |                |          |       | 0                         |
| 395.01856 | 9389.987 | 0.040 | 0.340605 | 0            |                |          |       | 0                         |
| 395.08979 | 71644.07 | 0.024 | 0.79668  | C20H22O6     | [M+K-2H]-      | 395.0902 | -1.16 | ['Matairesinol']          |
| 396.03026 | 24616.43 | 0.032 | 6.617968 | 0            |                |          |       | 0                         |
| 396.05140 | 85028.69 | 0.004 | 7.096663 | 0            |                |          |       | 0                         |
| 396.88767 | 44300.63 | 0.022 | 0.414127 | 0            |                |          |       | 0                         |
| 396.98296 | 29663.34 | 0.010 | 0.555085 | 0            |                |          |       | 0                         |
| 399.02612 | 10204.56 | 0.035 | 0.64467  | 0            |                |          |       | 0                         |
| 399.09969 | 11447.64 | 0.022 | 2.165422 | 0            |                |          |       | 0                         |

|           |          |       |          |   |   |
|-----------|----------|-------|----------|---|---|
| 400.21064 | 122029.4 | 0.024 | 0.355362 | 0 | 0 |
| 403.00006 | 1174850  | 0.026 | 0.789238 | 0 | 0 |
| 403.99680 | 4369.525 | 0.030 | 3.246265 | 0 | 0 |
| 404.00347 | 127158   | 0.041 | 0.803715 | 0 | 0 |
| 404.99818 | 85438.79 | 0.016 | 0.773985 | 0 | 0 |
| 405.00387 | 20616.95 | 0.011 | 0.681733 | 0 | 0 |
| 405.03176 | 45695.85 | 0.017 | 0.144539 | 0 | 0 |
| 406.00154 | 9153.281 | 0.036 | 0.75085  | 0 | 0 |
| 406.94931 | 21107.95 | 0.012 | 0.77953  | 0 | 0 |
| 407.02420 | 34013.66 | 0.025 | 5.287421 | 0 | 0 |
| 410.08090 | 10456.76 | 0.025 | 0.660721 | 0 | 0 |
| 412.02528 | 61712.16 | 0.000 | 5.521004 | 0 | 0 |
| 413.29089 | 36494.4  | 0.023 | 0.40733  | 0 | 0 |
| 415.00007 | 8541.158 | 0.019 | 0.584558 | 0 | 0 |
| 416.97952 | 6271.924 | 0.001 | 0.429897 | 0 | 0 |
| 417.03668 | 59464.16 | 0.046 | 3.30599  | 0 | 0 |
| 417.22850 | 10569.18 | 0.020 | 2.89085  | 0 | 0 |
| 417.32214 | 332910.6 | 0.044 | 0.781391 | 0 | 0 |

|           |          |       |          |          |                |          |       |                                                                                                         |
|-----------|----------|-------|----------|----------|----------------|----------|-------|---------------------------------------------------------------------------------------------------------|
| 418.97400 | 399597.6 | 0.023 | 0.574542 | 0        |                |          |       | 0                                                                                                       |
| 419.33022 | 10613.98 | 0.043 | 0.755125 | C28H46O  | [M+Na-<br>2H]- | 419.3295 | 1.64  | ['24-Methylenecholesterol', '4alpha-Methylzymosterol', 'Campest-4-en-3-one', 'Episterol', 'Fecosterol'] |
| 419.97741 | 43435    | 0.027 | 0.576194 | 0        |                |          |       | 0                                                                                                       |
| 420.96513 | 10609.33 | 0.050 | 0.666701 | 0        |                |          |       | 0                                                                                                       |
| 420.97215 | 57853.43 | 0.020 | 0.545912 | 0        |                |          |       | 0                                                                                                       |
| 420.97769 | 6686.12  | 0.024 | 0.637563 | 0        |                |          |       | 0                                                                                                       |
| 422.22977 | 8619.516 | 0.007 | 2.141872 | 0        |                |          |       | 0                                                                                                       |
| 430.01096 | 20642.08 | 0.020 | 0.659557 | 0        |                |          |       | 0                                                                                                       |
| 436.94617 | 10299.27 | 0.043 | 0.387488 | 0        |                |          |       | 0                                                                                                       |
| 440.85139 | 22451.31 | 0.049 | 0.470746 | 0        |                |          |       | 0                                                                                                       |
| 440.93488 | 43480.3  | 0.031 | 0.515917 | 0        |                |          |       | 0                                                                                                       |
| 441.03916 | 23696.46 | 0.043 | 0.411719 | 0        |                |          |       | 0                                                                                                       |
| 442.93315 | 8267.073 | 0.011 | 0.432965 | 0        |                |          |       | 0                                                                                                       |
| 445.24430 | 10413.22 | 0.041 | 0.540845 | C20H34O7 | [M+Hac-H]-     | 445.2443 | -0.02 | ['Oleandolide']                                                                                         |
| 445.25469 | 17190.69 | 0.032 | 1.335831 | C24H40O5 | [M+(37Cl)]-    | 445.254  | 1.49  | ['Cholic acid']                                                                                         |
| 446.14642 | 4508.743 | 0.028 | 1.818024 | 0        |                |          |       | 0                                                                                                       |



|           |          |       |          |             |        |          |      |  |         |
|-----------|----------|-------|----------|-------------|--------|----------|------|--|---------|
| 446.85994 | 6630.954 | 0.024 | 0.302032 | 0           |        |          |      |  | 0       |
| 446.93506 | 4342.773 | 0.036 | 0.673843 | 0           |        |          |      |  | 0       |
| 447.33275 | 7762.377 | 0.038 | 2.399131 | 0           |        |          |      |  | 0       |
| 451.09239 | 7009.633 | 0.018 | 0.602381 | 0           |        |          |      |  | 0       |
| 455.01357 | 95338.11 | 0.035 | 1.962844 | 0           |        |          |      |  | 0       |
| 455.09737 | 70691.46 | 0.013 | 1.730946 | C17H21N4O9P | [M-H]- | 455.0973 | 0.06 |  | ['FMN'] |
| 455.96808 | 20402.8  | 0.001 | 6.154062 | 0           |        |          |      |  | 0       |
| 456.01703 | 11786    | 0.036 | 2.135413 | 0           |        |          |      |  | 0       |
| 456.10076 | 13121.74 | 0.031 | 1.728465 | 0           |        |          |      |  | 0       |
| 457.00828 | 33531.7  | 0.044 | 0.434057 | 0           |        |          |      |  | 0       |
| 457.31713 | 7573.774 | 0.050 | 2.146374 | 0           |        |          |      |  | 0       |
| 461.02098 | 18029.07 | 0.013 | 0.345368 | 0           |        |          |      |  | 0       |
| 461.31204 | 4932.762 | 0.012 | 0.571876 | 0           |        |          |      |  | 0       |
| 462.16243 | 10244.3  | 0.041 | 1.672694 | 0           |        |          |      |  | 0       |
| 462.91683 | 178675.6 | 0.020 | 0.597486 | 0           |        |          |      |  | 0       |
| 464.91496 | 25587.43 | 0.031 | 0.660485 | 0           |        |          |      |  | 0       |
| 465.20477 | 8437.601 | 0.007 | 3.673081 | 0           |        |          |      |  | 0       |
| 467.30828 | 2286.352 | 0.034 | 2.761173 | 0           |        |          |      |  | 0       |

|           |          |       |          |             |                |          |       |                         |
|-----------|----------|-------|----------|-------------|----------------|----------|-------|-------------------------|
| 467.31436 | 100336.9 | 0.001 | 2.938404 | C28H46O4    | [M+Na-<br>2H]- | 467.3143 | 0.17  | ['3-Dehydroteasterone'] |
| 468.31763 | 23929.52 | 0.001 | 2.993613 | 0           |                |          |       | 0                       |
| 470.98753 | 102075.1 | 0.012 | 1.542226 | 0           |                |          |       | 0                       |
| 471.99111 | 12580.58 | 0.036 | 1.567841 | 0           |                |          |       | 0                       |
| 472.90393 | 9042.702 | 0.046 | 0.391256 | 0           |                |          |       | 0                       |
| 473.04494 | 20347.17 | 0.011 | 2.170725 | 0           |                |          |       | 0                       |
| 477.07949 | 16095.65 | 0.027 | 1.852751 | C17H21N4O9P | [M+Na-<br>2H]- | 477.0793 | 0.42  | ['FMN']                 |
| 477.95016 | 13801.5  | 0.025 | 4.073854 | 0           |                |          |       | 0                       |
| 478.05438 | 51793.25 | 0.011 | 9.214642 | 0           |                |          |       | 0                       |
| 479.26913 | 12800.19 | 0.033 | 0.308484 | 0           |                |          |       | 0                       |
| 483.27280 | 17228.21 | 0.048 | 0.427259 | C27H42O6    | [M+Na-<br>2H]- | 483.2728 | -0.02 | ['3-Dehydroecdysone']   |
| 487.30580 | 36843.2  | 0.014 | 4.941723 | 0           |                |          |       | 0                       |
| 490.86467 | 6192.843 | 0.029 | 0.437448 | 0           |                |          |       | 0                       |
| 494.02849 | 32949.37 | 0.001 | 5.84974  | 0           |                |          |       | 0                       |
| 494.88582 | 16112.09 | 0.043 | 0.472906 | 0           |                |          |       | 0                       |

|           |          |       |          |   |   |
|-----------|----------|-------|----------|---|---|
| 500.97064 | 4122.168 | 0.044 | 0.559497 | 0 | 0 |
| 500.97718 | 218491.7 | 0.025 | 0.628774 | 0 | 0 |
| 501.98050 | 25990.31 | 0.043 | 0.638596 | 0 | 0 |
| 506.96396 | 32383.23 | 0.041 | 0.784985 | 0 | 0 |
| 510.00237 | 18256.89 | 0.043 | 2.839915 | 0 | 0 |
| 512.01404 | 13813.01 | 0.020 | 0.656641 | 0 | 0 |
| 516.01022 | 34202.9  | 0.002 | 4.753122 | 0 | 0 |
| 516.95101 | 67361.46 | 0.036 | 0.423923 | 0 | 0 |
| 516.97205 | 19412.49 | 0.027 | 0.457413 | 0 | 0 |
| 518.94914 | 16997.17 | 0.044 | 0.419874 | 0 | 0 |
| 522.83353 | 14325.62 | 0.041 | 0.41742  | 0 | 0 |
| 522.93790 | 53976.83 | 0.013 | 0.547931 | 0 | 0 |
| 527.95779 | 50976.84 | 0.008 | 0.068359 | 0 | 0 |
| 529.46253 | 26172.26 | 0.017 | 0.491351 | 0 | 0 |
| 537.01664 | 63204.62 | 0.043 | 1.974318 | 0 | 0 |
| 537.10055 | 22497.61 | 0.011 | 1.941507 | 0 | 0 |
| 537.97128 | 20506.44 | 0.012 | 4.053712 | 0 | 0 |
| 538.82841 | 15268.5  | 0.045 | 0.424234 | 0 | 0 |

|           |          |       |          |               |        |          |       |                                      |   |
|-----------|----------|-------|----------|---------------|--------|----------|-------|--------------------------------------|---|
| 538.91170 | 13424.44 | 0.044 | 0.396541 | 0             |        |          |       |                                      | 0 |
| 539.07325 | 9539.12  | 0.026 | 0.448904 | 0             |        |          |       |                                      | 0 |
| 544.91185 | 2683.584 | 0.040 | 0.573179 | 0             |        |          |       |                                      | 0 |
| 544.91992 | 144393.8 | 0.011 | 0.582322 | 0             |        |          |       |                                      | 0 |
| 545.92328 | 15383.57 | 0.016 | 0.62287  | 0             |        |          |       |                                      | 0 |
| 546.91805 | 23881.46 | 0.043 | 0.691761 | 0             |        |          |       |                                      | 0 |
| 549.03685 | 7352.459 | 0.023 | 2.782517 | 0             |        |          |       |                                      | 0 |
| 552.99049 | 76596.34 | 0.049 | 1.435629 | 0             |        |          |       |                                      | 0 |
| 553.07450 | 7110.883 | 0.008 | 2.911447 | 0             |        |          |       |                                      | 0 |
| 553.94515 | 12636.18 | 0.031 | 4.78392  | 0             |        |          |       |                                      | 0 |
| 555.28442 | 110453   | 0.004 | 0.149613 | 0             |        |          |       |                                      | 0 |
| 556.07675 | 10407.29 | 0.031 | 0.641266 | 0             |        |          |       |                                      | 0 |
| 557.10821 | 46958.45 | 0.002 | 0.069674 | 0             |        |          |       |                                      | 0 |
| 558.06419 | 23231.02 | 0.008 | 0.188537 | C15H23N5O14P2 | [M-H]- | 558.0644 | -0.38 | ['ADP-ribose', 'Phosphoribosyl-AMP'] |   |
| 558.95624 | 26757.04 | 0.043 | 1.519944 | 0             |        |          |       |                                      | 0 |
| 562.91299 | 10276.38 | 0.048 | 0.512478 | 0             |        |          |       |                                      | 0 |
| 564.34422 | 146251.7 | 0.038 | 0.615312 | 0             |        |          |       |                                      | 0 |
| 565.34736 | 49145.49 | 0.028 | 0.603372 | 0             |        |          |       |                                      | 0 |

|           |          |       |          |   |   |
|-----------|----------|-------|----------|---|---|
| 576.88866 | 14082.87 | 0.046 | 0.440311 | 0 | 0 |
|-----------|----------|-------|----------|---|---|

---

- a) Average intensity across all samples.
- b) From t-test between unexposed control and 10,000ug/L ceria NP exposed samples with a false discovery rate (FDR) of 5% to correct for multiple hypothesis testing.
- c) Fold change in intensity from control to NP exposed group.
- d) Calculated for the specified ion form of the empirical formula.
- e) Error between the observed and theoretical masses, presented as parts per million of the theoretical mass.
- f) Derived from the transformation mapping approach for metabolite identification, described in Weber and Viant (2010).

**TABLE S3. Significantly differentially expressed gene transcripts of *C. reinhardtii* following exposure to 10,000µg/L ceria NPs relative to controls.**

| Probe                  | Gene ID<br>(Augustus 9) | Putative Identity                                      | Fold-<br>change <sup>a</sup> | q-<br>value <sup>b</sup> | Chromosome    | Gene start<br>(bp) | Gene end<br>(bp) | KEGG<br>ID |
|------------------------|-------------------------|--------------------------------------------------------|------------------------------|--------------------------|---------------|--------------------|------------------|------------|
| CUST_14053_P1425379931 | Au9.Cre05.g235850       | hypothetical protein<br>CHLREDRAFT_151001              | 6.298                        | 8.40E-03                 | chromosome_5  | 1237659            | 1241153          |            |
| CUST_2595_P1425379931  | Au9.Cre02.g089400       | hydroxyproline-rich glycoprotein                       | 5.773                        | 1.25E-02                 | chromosome_2  | 2025984            | 2030918          |            |
| CUST_11072_P1425379931 | Au9.Cre06.g302050       | Glycosyl transferase                                   | 5.679                        | 2.75E-02                 | chromosome_6  | 6435637            | 6451284          | K00706     |
| CUST_13501_P1425379931 | Au9.Cre05.g243600       | glyoxal or galactose oxidase                           | 4.999                        | 2.75E-02                 | chromosome_5  | 2523771            | 2546350          |            |
| CUST_2674_P1425379931  | Au9.Cre05.g243450       | glyoxal or galactose oxidase                           | 4.872                        | 2.75E-02                 | chromosome_5  | 2496721            | 2504660          |            |
| CUST_10131_P1425379931 | Au9.Cre13.g605200       | Matrix metalloproteinase                               | 4.147                        | 3.54E-02                 | chromosome_13 | 6182735            | 6188609          |            |
| CUST_3362_P1425379931  | Au9.Cre20.g758600       | predicted protein                                      | 4.036                        | 1.05E-02                 | scaffold_20   | 171591             | 174752           |            |
| CUST_14219_P1425379931 | Au9.Cre02.g127250       | hydroxyproline-rich glycoprotein,<br>cell wall protein | 3.826                        | 8.40E-03                 | chromosome_2  | 6909281            | 6914671          |            |
| CUST_13377_P1425379931 | Au9.Cre06.g292900       | glycosyltransferase-like 1b                            | 3.797                        | 1.26E-02                 | chromosome_6  | 5157291            | 5163612          |            |

|                        |                   |                                               |       |          |               |         |         |        |
|------------------------|-------------------|-----------------------------------------------|-------|----------|---------------|---------|---------|--------|
| CUST_3569_PI425379931  | Au9.Cre17.g732350 | glyoxal or galactose oxidase                  | 3.725 | 3.89E-02 | chromosome_17 | 4512061 | 4520282 |        |
| CUST_5561_PI425379931  | Au9.Cre01.g036350 | Plasma membrane-type proton<br>ATPase         | 3.697 | 3.89E-02 | chromosome_1  | 5055136 | 5067549 | K05850 |
| CUST_96_PI425379931    | Au9.Cre01.g047150 | predicted protein                             | 3.622 | 1.94E-02 | chromosome_1  | 6489928 | 6493130 |        |
| CUST_9049_PI425379931  | Au9.Cre05.g235600 | hypothetical protein                          | 3.548 | 8.40E-03 | chromosome_5  | 1207134 | 1210265 |        |
|                        |                   | CHLREDRAFT_151001                             |       |          |               |         |         |        |
| CUST_2852_PI425379931  | Au9.Cre06.g299900 | hypothetical protein                          | 3.496 | 2.83E-02 | chromosome_6  | 6134122 | 6138691 |        |
|                        |                   | CHLREDRAFT_205652                             |       |          |               |         |         |        |
| CUST_431_PI425379931   | Au9.Cre08.g361400 | tesmin/tso1-related                           | 3.483 | 9.21E-03 | chromosome_8  | 495624  | 505192  |        |
| CUST_13156_PI425379931 | Au9.Cre03.g155750 | lithostathine                                 | 3.451 | 2.75E-02 | chromosome_3  | 1001702 | 1006243 |        |
| CUST_9609_PI425379931  | Au9.Cre09.g393700 | Matrix metalloproteinase                      | 3.368 | 9.46E-03 | chromosome_9  | 1215145 | 1220632 |        |
| CUST_1269_PI425379931  | Au9.Cre19.g754150 | predicted protein                             | 3.327 | 6.85E-03 | scaffold_19   | 361144  | 365912  |        |
| CUST_12973_PI425379931 | Au9.Cre02.g117200 | beta-galactosidase                            | 3.176 | 2.75E-02 | chromosome_2  | 5684579 | 5691266 | K12308 |
| CUST_10355_PI425379931 | Au9.Cre06.g263700 | predicted protein                             | 3.04  | 3.68E-02 | chromosome_6  | 1932276 | 1935573 |        |
| CUST_5289_PI425379931  | Au9.Cre16.g657900 | er-targeted preprotein translocase<br>subunit | 3.031 | 2.75E-02 | chromosome_16 | 1314865 | 1317210 | K09540 |
| CUST_14634_PI425379931 | Au9.Cre10.g441550 | hypothetical protein                          | 2.954 | 2.75E-02 | chromosome_10 | 3024020 | 3029805 |        |
|                        |                   | CHLREDRAFT_144191                             |       |          |               |         |         |        |

|                        |                   |                                                                  |       |          |               |         |         |        |
|------------------------|-------------------|------------------------------------------------------------------|-------|----------|---------------|---------|---------|--------|
| CUST_8481_PI425379931  | Au9.Cre09.g390300 | Tyrosine kinase specific for activated<br>(GTP-bound) p21cdc42Hs | 2.937 | 1.52E-02 | chromosome_9  | 689304  | 702835  | K14510 |
| CUST_4080_PI425379931  | Au9.Cre17.g732600 | glyoxal or galactose oxidase                                     | 2.91  | 2.88E-02 | chromosome_17 | 4560471 | 4574487 |        |
| CUST_1157_PI425379931  | Au9.Cre01.g026500 | pepsin-type aspartyl protease                                    | 2.904 | 3.66E-02 | chromosome_1  | 3888839 | 3892804 |        |
| CUST_14359_PI425379931 | Au9.Cre01.g046400 | Membrane selenoprotein                                           | 2.893 | 2.88E-02 | chromosome_1  | 6423308 | 6429972 |        |
| CUST_6563_PI425379931  | Au9.Cre01.g046450 | Membrane selenoprotein                                           | 2.832 | 3.80E-02 | chromosome_1  | 6431298 | 6435508 |        |
| CUST_4754_PI425379931  | Au9.Cre12.g487050 | predicted protein                                                | 2.804 | 1.76E-02 | chromosome_12 | 470518  | 474583  |        |
| CUST_12086_PI425379931 | Au9.Cre06.g306000 | glyoxal or galactose oxidase                                     | 2.804 | 2.11E-02 | chromosome_6  | 6952881 | 6959606 |        |
| CUST_6740_PI425379931  | Au9.Cre03.g170300 | subtilisin/kexin-related serine<br>protease                      | 2.795 | 1.29E-02 | chromosome_3  | 2826365 | 2832941 |        |
| CUST_11277_PI425379931 | Au9.Cre01.g046500 | Membrane selenoprotein                                           | 2.769 | 3.41E-02 | chromosome_1  | 6436858 | 6441033 |        |
| CUST_12187_PI425379931 | Au9.Cre09.g400950 | major facilitator superfamily mfs_1                              | 2.718 | 8.40E-03 | chromosome_9  | 2341085 | 2348989 |        |
| CUST_9476_PI425379931  | Au9.Cre13.g595800 | hypothetical protein<br>CHLREDRAFT_176850                        | 2.716 | 3.56E-02 | chromosome_13 | 4690748 | 4694410 |        |
| CUST_2807_PI425379931  | Au9.Cre17.g717850 | cell wall protein pherophorin-C8                                 | 2.711 | 1.05E-02 | chromosome_17 | 2686130 | 2693029 |        |
| CUST_9544_PI425379931  | Au9.Cre02.g122550 | predicted protein                                                | 2.704 | 4.26E-02 | chromosome_2  | 6355638 | 6359241 |        |
| CUST_8113_PI425379931  | Au9.Cre01.g046350 | Membrane selenoprotein                                           | 2.691 | 3.80E-02 | chromosome_1  | 6416868 | 6422024 |        |
| CUST_5213_PI425379931  | Au9.Cre03.g173100 | glycoside hydrolase family 16                                    | 2.664 | 3.17E-02 | chromosome_3  | 3138146 | 3144897 |        |



|                        |                   |                                                                                  |       |          |               |         |         |        |
|------------------------|-------------------|----------------------------------------------------------------------------------|-------|----------|---------------|---------|---------|--------|
| CUST_9447_PI425379931  | Au9.Cre02.g110650 | glycosyl transferase family 8                                                    | 2.644 | 4.83E-02 | chromosome_2  | 4863914 | 4871374 |        |
| CUST_10731_PI425379931 | Au9.Cre09.g398900 | vegetative cell wall protein gp1                                                 | 2.582 | 6.85E-03 | chromosome_9  | 1995091 | 1997997 |        |
| CUST_7642_PI425379931  | Au9.Cre02.g142650 | predicted protein                                                                | 2.56  | 6.85E-03 | chromosome_2  | 9274420 | 9280446 |        |
| CUST_1113_PI425379931  | Au9.Cre02.g124550 | O-methyltransferase                                                              | 2.527 | 1.09E-02 | chromosome_2  | 6561602 | 6564087 |        |
| CUST_13989_PI425379931 | Au9.Cre13.g569450 | predicted protein                                                                | 2.509 | 6.85E-03 | chromosome_13 | 1091471 | 1096468 |        |
| CUST_9987_PI425379931  | Au9.Cre16.g692350 | serine-threonine protein kinase,<br>plant-type                                   | 2.5   | 6.85E-03 | chromosome_16 | 6039976 | 6050997 | K13417 |
| CUST_4067_PI425379931  | Au9.Cre01.g053150 | Glycerol-3-Phosphate<br>Dehydrogenase/Dihydroxyacetone-<br>3-Phosphate Reductase | 2.493 | 2.23E-02 | chromosome_1  | 7368409 | 7375573 | K00006 |
| CUST_13169_PI425379931 | Au9.Cre02.g081700 | predicted protein                                                                | 2.467 | 4.34E-02 | chromosome_2  | 1096096 | 1100288 |        |
| CUST_9799_PI425379931  | Au9.Cre13.g598700 | cysteine-rich secretory protein<br>(crisp/scp/tpx1)-related                      | 2.463 | 8.40E-03 | chromosome_13 | 5026161 | 5031508 |        |
| CUST_1446_PI425379931  | Au9.Cre06.g275050 | Gamma-glutamyl hydrolase                                                         | 2.451 | 4.26E-02 | chromosome_6  | 3090461 | 3095393 | K01307 |
| CUST_8139_PI425379931  | Au9.Cre14.g620250 | predicted protein                                                                | 2.445 | 3.80E-02 | chromosome_14 | 1822549 | 1830691 |        |
| CUST_1860_PI425379931  | Au9.Cre10.g455050 | hypothetical protein<br>CHLREDRAFT_168119                                        | 2.444 | 1.00E-02 | chromosome_10 | 4946641 | 4955171 |        |
| CUST_7865_PI425379931  | Au9.Cre17.g708450 | Matrix metalloproteinase                                                         | 2.442 | 2.72E-02 | chromosome_17 | 1678666 | 1685730 |        |

|                        |                   |                                                     |       |          |               |         |         |        |
|------------------------|-------------------|-----------------------------------------------------|-------|----------|---------------|---------|---------|--------|
| CUST_12299_PI425379931 | Au9.Cre07.g343150 | predicted protein                                   | 2.428 | 2.75E-02 | chromosome_7  | 4166768 | 4176266 |        |
| CUST_11664_PI425379931 | Au9.Cre18.g749150 | Serine/threonine protein kinase                     | 2.427 | 8.40E-03 | scaffold_18   | 897371  | 902556  |        |
| CUST_433_PI425379931   | Au9.Cre18.g749050 | serine-threonine protein kinase                     | 2.426 | 8.40E-03 | scaffold_18   | 884203  | 889456  |        |
| CUST_308_PI425379931   | Au9.Cre17.g713750 | Serine/threonine protein kinase                     | 2.405 | 2.72E-02 | chromosome_17 | 2275865 | 2280125 | K04373 |
| CUST_1880_PI425379931  | Au9.Cre18.g749100 | serine-threonine protein kinase                     | 2.392 | 8.40E-03 | scaffold_18   | 889503  | 895616  |        |
| CUST_12511_PI425379931 | Au9.Cre10.g429600 | zinc finger dhhc domain containing<br>protein       | 2.373 | 4.22E-03 | chromosome_10 | 1577326 | 1586276 | K05766 |
| CUST_10098_PI425379931 | Au9.Cre03.g197800 | myosin i, high molecular weight<br>form             | 2.368 | 1.09E-02 | chromosome_3  | 5716230 | 5721323 | K03165 |
| CUST_14610_PI425379931 | Au9.Cre18.g749200 | serine-threonine protein kinase                     | 2.351 | 9.46E-03 | scaffold_18   | 905805  | 910181  |        |
| CUST_378_PI425379931   | Au9.Cre06.g309450 | carboxypeptidase d                                  | 2.334 | 1.09E-02 | chromosome_6  | 7326129 | 7331732 | K01294 |
| CUST_6088_PI425379931  | Au9.Cre12.g501600 | predicted protein                                   | 2.329 | 2.29E-02 | chromosome_12 | 2132945 | 2137701 |        |
| CUST_3018_PI425379931  | Au9.Cre17.g728450 |                                                     | 2.321 | 3.80E-02 | chromosome_17 | 3936167 | 3954837 |        |
| CUST_8044_PI425379931  | Au9.Cre04.g214650 | Glycosyl transferase                                | 2.321 | 9.46E-03 | chromosome_4  | 513498  | 548581  | K00706 |
| CUST_13776_PI425379931 | Au9.Cre11.g481600 | hydroxyproline-rich glycoprotein,<br>stress-induced | 2.302 | 8.40E-03 | chromosome_11 | 2467344 | 2470141 |        |
| CUST_9510_PI425379931  | Au9.Cre03.g195900 | predicted protein                                   | 2.271 | 8.40E-03 | chromosome_3  | 5555407 | 5559238 |        |
| CUST_10548_PI425379931 | Au9.Cre23.g767950 | calcium/calmodulin-dependent                        | 2.253 | 6.85E-03 | scaffold_23   | 319317  | 322178  |        |

|                        |                   |                                  |       |          |               |         |         |        |
|------------------------|-------------------|----------------------------------|-------|----------|---------------|---------|---------|--------|
|                        |                   | protein kinase-related           |       |          |               |         |         |        |
| CUST_282_P1425379931   | Au9.Cre10.g431800 | Arylsulfatase-like protein       | 2.227 | 4.26E-02 | chromosome_10 | 1855836 | 1859625 | K01130 |
| CUST_10639_P1425379931 | Au9.Cre03.g150250 | predicted protein                | 2.224 | 8.40E-03 | chromosome_3  | 320857  | 329682  |        |
| CUST_280_P1425379931   | Au9.Cre17.g710350 | glycosyltransferase-like 1b      | 2.213 | 1.51E-02 | chromosome_17 | 1914267 | 1921398 |        |
| CUST_353_P1425379931   | Au9.Cre09.g403150 | predicted protein                | 2.213 | 2.09E-02 | chromosome_9  | 2622823 | 2626877 |        |
| CUST_2155_P1425379931  | Au9.Cre01.g054750 | calcium/calmodulin-dependent     | 2.209 | 6.85E-03 | chromosome_1  | 7562853 | 7565904 | K06641 |
|                        |                   | protein kinase-related           |       |          |               |         |         |        |
| CUST_4496_P1425379931  | Au9.Cre13.g585050 | expressed hypothetical protein   | 2.208 | 1.96E-02 | chromosome_13 | 3145373 | 3150323 |        |
| CUST_10521_P1425379931 | Au9.Cre12.g498650 | Aurora-like kinase               | 2.193 | 3.93E-02 | chromosome_12 | 1842933 | 1848546 | K11481 |
| CUST_7021_P1425379931  | Au9.Cre06.g258800 | hydroxyproline-rich glycoprotein | 2.192 | 3.17E-02 | chromosome_6  | 1374349 | 1379615 |        |
|                        |                   | component of the outer cell wall |       |          |               |         |         |        |
| CUST_384_P1425379931   | Au9.Cre13.g575200 | serine/threonine protein         | 2.189 | 8.40E-03 | chromosome_13 | 1810455 | 1817072 | K14501 |
|                        |                   | phosphatase                      |       |          |               |         |         |        |
| CUST_13971_P1425379931 | Au9.Cre18.g749000 | serine-threonine protein kinase  | 2.185 | 2.72E-02 | scaffold_18   | 878889  | 884154  |        |
| CUST_10099_P1425379931 | Au9.Cre03.g174800 | hypothetical protein             | 2.185 | 1.09E-02 | chromosome_3  | 3338866 | 3344800 |        |
| CUST_2816_P1425379931  | Au9.Cre06.g299950 | predicted protein                | 2.181 | 3.80E-02 | chromosome_6  | 6140156 | 6145845 |        |
| CUST_10897_P1425379931 | Au9.Cre02.g077750 | Flagellar Associated Protein     | 2.163 | 1.94E-02 | chromosome_2  | 587531  | 593538  |        |
| CUST_9700_P1425379931  | Au9.Cre13.g600900 | glyoxal or galactose oxidase     | 2.155 | 4.26E-02 | chromosome_13 | 5260019 | 5265086 |        |

|                        |                   |                                           |       |          |               |         |         |        |
|------------------------|-------------------|-------------------------------------------|-------|----------|---------------|---------|---------|--------|
| CUST_5278_P1425379931  | Au9.Cre10.g446650 | pentatricopeptide repeat-containing       | 2.153 | 1.29E-02 | chromosome_10 | 3737180 | 3747527 | K12854 |
| CUST_11891_P1425379931 | Au9.Cre03.g201650 | predicted protein                         | 2.149 | 8.40E-03 | chromosome_3  | 6254327 | 6256808 |        |
| CUST_2543_P1425379931  | Au9.Cre10.g421350 | Matrix metalloproteinase                  | 2.142 | 2.11E-02 | chromosome_10 | 540508  | 546731  |        |
| CUST_12906_P1425379931 | Au9.Cre10.g465500 | cyclic nucleotide-binding protein         | 2.139 | 3.89E-02 | chromosome_10 | 6352119 | 6355356 |        |
| CUST_1588_P1425379931  | Au9.Cre04.g226050 | periplasmic arylsulfatase                 | 2.122 | 2.11E-02 | chromosome_4  | 2327318 | 2333885 | K01130 |
| CUST_2858_P1425379931  | Au9.Cre17.g733450 | gag/pol/env polyprotein                   | 2.118 | 1.52E-02 | chromosome_17 | 4770865 | 4786616 |        |
| CUST_4419_P1425379931  | Au9.Cre10.g446600 | gag/pol/env polyprotein                   | 2.103 | 1.52E-02 | chromosome_10 | 3723086 | 3736827 | K04228 |
| CUST_8171_P1425379931  | Au9.Cre05.g239700 | hypothetical protein<br>CHLREDRAFT_150908 | 2.1   | 2.11E-02 | chromosome_5  | 1865642 | 1869547 |        |
| CUST_11126_P1425379931 | Au9.Cre01.g014950 | hypothetical protein<br>CHLREDRAFT_193168 | 2.098 | 8.40E-03 | chromosome_1  | 2383511 | 2388248 |        |
| CUST_13067_P1425379931 | Au9.Cre50.g789900 | gag/pol/env polyprotein                   | 2.096 | 1.09E-02 | scaffold_50   | 1792    | 15915   |        |
| CUST_11869_P1425379931 | Au9.Cre01.g062000 | predicted protein                         | 2.092 | 2.11E-02 | chromosome_1  | 8573660 | 8579621 |        |
| CUST_3023_P1425379931  | Au9.Cre17.g731050 | abc transporter family protein            | 2.08  | 1.35E-02 | chromosome_17 | 4376729 | 4381385 | K12608 |
| CUST_1556_P1425379931  | Au9.Cre03.g163800 | predicted protein                         | 2.073 | 8.40E-03 | chromosome_3  | 2022867 | 2030948 |        |
| CUST_403_P1425379931   | Au9.Cre07.g342700 | predicted protein                         | 2.068 | 2.11E-02 | chromosome_7  | 4116697 | 4119140 |        |
| CUST_2885_P1425379931  | Au9.Cre10.g458800 | hypothetical protein<br>CHLREDRAFT_187729 | 2.065 | 1.52E-02 | chromosome_10 | 5460293 | 5464867 |        |

|                        |                   |                                              |       |          |               |         |         |        |
|------------------------|-------------------|----------------------------------------------|-------|----------|---------------|---------|---------|--------|
| CUST_14_PI425379931    | Au9.Cre12.g529900 | spindle pole body protein                    | 2.06  | 1.76E-02 | chromosome_12 | 5258519 | 5264020 |        |
| CUST_4850_PI425379931  | Au9.Cre03.g202250 | DNA polymerase delta, subunit C              | 2.06  | 1.09E-02 | chromosome_3  | 6334116 | 6337499 | K03504 |
| CUST_3525_PI425379931  | Au9.Cre08.g371350 | hypothetical protein                         | 2.058 | 1.00E-02 | chromosome_8  | 1957423 | 1958926 |        |
|                        |                   | CHLREDRAFT_179239                            |       |          |               |         |         |        |
| CUST_7973_PI425379931  | Au9.Cre07.g340950 | reticulon3-a3                                | 2.05  | 8.40E-03 | chromosome_7  | 3847629 | 3855007 |        |
| CUST_219_PI425379931   | Au9.Cre17.g710850 | solute carrier family member e3              | 2.048 | 3.80E-02 | chromosome_17 | 1962277 | 1966331 |        |
| CUST_9279_PI425379931  | Au9.Cre07.g330850 | solute carrier family 35                     | 2.045 | 9.46E-03 | chromosome_7  | 2362977 | 2367452 |        |
| CUST_7779_PI425379931  | Au9.Cre24.g769750 | kelch-related proteins                       | 2.043 | 2.83E-02 | scaffold_24   | 142696  | 147130  |        |
| CUST_438_PI425379931   | Au9.Cre19.g753800 | 3',5'-cyclic-nucleotide<br>phosphodiesterase | 2.04  | 1.52E-02 | scaffold_19   | 318492  | 328090  |        |
| CUST_12092_PI425379931 | Au9.Cre16.g648450 | hypothetical protein                         | 2.037 | 1.00E-02 | chromosome_16 | 122796  | 134285  |        |
|                        |                   | CHLREDRAFT_185177                            |       |          |               |         |         |        |
| CUST_11489_PI425379931 | Au9.Cre14.g618550 | predicted protein                            | 2.037 | 1.96E-02 | chromosome_14 | 1520289 | 1526088 |        |
| CUST_2799_PI425379931  | Au9.Cre16.g693550 | hydroxyproline-rich cell wall protein        | 2.035 | 1.09E-02 | chromosome_16 | 6217711 | 6219581 |        |
| CUST_7893_PI425379931  | Au9.Cre16.g676700 | hypothetical protein                         | 2.033 | 3.80E-02 | chromosome_16 | 4050248 | 4055190 |        |
|                        |                   | CHLREDRAFT_191559                            |       |          |               |         |         |        |
| CUST_14174_PI425379931 | Au9.Cre01.g027900 | Intraflagellar transport protein             | 2.027 | 2.29E-02 | chromosome_1  | 4034222 | 4036285 |        |
|                        |                   | 74/72                                        |       |          |               |         |         |        |
| CUST_7208_PI425379931  | Au9.Cre07.g356150 | caax prenyl protease                         | 2.024 | 8.40E-03 | chromosome_7  | 5912860 | 5918171 | K01047 |

|                        |                   |                                   |       |          |               |         |         |        |
|------------------------|-------------------|-----------------------------------|-------|----------|---------------|---------|---------|--------|
| CUST_6378_PI425379931  | Au9.Cre17.g696700 | cell wall protein pherophorin-C22 | 2.021 | 3.41E-02 | chromosome_17 | 75402   | 77574   |        |
| CUST_2866_PI425379931  | Au9.Cre13.g607000 | aminoacyl-histidine dipeptidase   | 2.019 | 4.74E-02 | chromosome_13 | 6431118 | 6437643 | K01270 |
| CUST_10532_PI425379931 | Au9.Cre10.g436600 | ribosome-associated gtpase        | 2.018 | 2.75E-02 | chromosome_10 | 2493327 | 2496382 |        |
| CUST_14047_PI425379931 | Au9.Cre07.g330750 | hypothetical protein              | 2.001 | 2.75E-02 | chromosome_7  | 2351481 | 2355512 |        |
|                        |                   | CHLREDRAFT_144348                 |       |          |               |         |         |        |
| CUST_2439_PI425379931  | Au9.Cre02.g090950 | predicted protein                 | 1.996 | 3.80E-02 | chromosome_2  | 2245032 | 2259080 |        |
| CUST_10492_PI425379931 | Au9.Cre01.g031050 | Global transcription factor       | 1.995 | 8.07E-03 | chromosome_1  | 4384037 | 4391942 |        |
| CUST_8183_PI425379931  | Au9.Cre14.g629000 | reticulon3-a3                     | 1.992 | 4.59E-02 | chromosome_14 | 3136014 | 3142649 |        |
| CUST_393_PI425379931   | Au9.Cre14.g610100 | predicted protein                 | 1.992 | 2.11E-02 | chromosome_14 | 335555  | 339423  |        |
| CUST_8174_PI425379931  | Au9.Cre12.g536900 | cobalamin synthesis protein p47k  | 1.991 | 2.72E-02 | chromosome_12 | 6114176 | 6128387 |        |
| CUST_8207_PI425379931  | Au9.Cre12.g549000 | cell wall protein pherophorin-C4  | 1.984 | 2.75E-02 | chromosome_12 | 7702572 | 7705412 |        |
| CUST_1938_PI425379931  | Au9.Cre03.g156850 | serine-threonine protein kinase,  | 1.981 | 2.75E-02 | chromosome_3  | 1127149 | 1135912 |        |
|                        |                   | plant-type                        |       |          |               |         |         |        |
| CUST_12225_PI425379931 | Au9.Cre13.g591150 | Histone H2A                       | 1.975 | 6.85E-03 | chromosome_13 | 4158442 | 4159526 | K11251 |
| CUST_11312_PI425379931 | Au9.Cre04.g216900 | hypothetical protein              | 1.97  | 2.45E-02 | chromosome_4  | 907904  | 915825  |        |
|                        |                   | CHLREDRAFT_195076                 |       |          |               |         |         |        |
| CUST_13038_PI425379931 | Au9.Cre17.g704100 | predicted protein                 | 1.945 | 2.09E-02 | chromosome_17 | 1120021 | 1123013 |        |
| CUST_5532_PI425379931  | Au9.Cre12.g514550 | Actin filament-coating protein    | 1.942 | 1.22E-02 | chromosome_12 | 3555258 | 3563556 |        |

|                        |                   |                                      |       |          |               |         |         |        |  |
|------------------------|-------------------|--------------------------------------|-------|----------|---------------|---------|---------|--------|--|
|                        |                   | tropomyosin                          |       |          |               |         |         |        |  |
| CUST_7404_PI425379931  | Au9.Cre07.g319450 | hypothetical protein                 | 1.933 | 4.59E-02 | chromosome_7  | 1002918 | 1008747 |        |  |
|                        |                   | CHLREDRAFT_142763                    |       |          |               |         |         |        |  |
| CUST_1520_PI425379931  | Au9.Cre17.g710300 | hydroxyproline-rich stress-induced   | 1.927 | 3.54E-02 | chromosome_17 | 1909427 | 1913558 |        |  |
| CUST_11554_PI425379931 | Au9.Cre17.g717900 | cell wall protein pherophorin-C1     | 1.915 | 1.52E-02 | chromosome_17 | 2695040 | 2698180 |        |  |
| CUST_8318_PI425379931  | Au9.Cre01.g010100 | predicted protein                    | 1.91  | 4.98E-02 | chromosome_1  | 1665412 | 1667706 |        |  |
| CUST_13521_PI425379931 | Au9.Cre12.g507350 | hypothetical protein                 | 1.907 | 2.29E-02 | chromosome_12 | 2689328 | 2695428 |        |  |
|                        |                   | CHLREDRAFT_169699                    |       |          |               |         |         |        |  |
| CUST_2039_PI425379931  | Au9.Cre12.g513450 | Eta tubulin; was TUH;Eta tubulin;    | 1.902 | 2.88E-02 | chromosome_12 | 3422074 | 3426335 | K07375 |  |
|                        |                   | was TUH                              |       |          |               |         |         |        |  |
| CUST_5095_PI425379931  | Au9.Cre15.g642300 | atp-dependent dna helicase pif1      | 1.884 | 1.05E-02 | chromosome_15 | 1602196 | 1605831 |        |  |
| CUST_4422_PI425379931  | Au9.Cre09.g409900 | hydroxyproline-rich stress-induced   | 1.871 | 4.26E-02 | chromosome_9  | 3638552 | 3642220 |        |  |
| CUST_11668_PI425379931 | Au9.Cre01.g051950 | pepsin-type aspartyl protease        | 1.869 | 2.75E-02 | chromosome_1  | 7204009 | 7208514 |        |  |
| CUST_1233_PI425379931  | Au9.Cre13.g565800 | UDP-Glucose:protein                  | 1.863 | 2.66E-02 | chromosome_13 | 585110  | 587095  |        |  |
|                        |                   | transglucosylase                     |       |          |               |         |         |        |  |
| CUST_2057_PI425379931  | Au9.Cre02.g133950 | Transient potential receptor channel | 1.86  | 1.05E-02 | chromosome_2  | 7829971 | 7849779 |        |  |
| CUST_5566_PI425379931  | Au9.Cre01.g056850 | DNA helicase PIF1/RRM3               | 1.859 | 1.29E-02 | chromosome_1  | 7874938 | 7881995 |        |  |
| CUST_7871_PI425379931  | Au9.Cre01.g000650 | Copper amine oxidase                 | 1.858 | 2.69E-02 | chromosome_1  | 74656   | 81967   | K00276 |  |

|                        |                   |                                                   |       |          |               |         |         |        |
|------------------------|-------------------|---------------------------------------------------|-------|----------|---------------|---------|---------|--------|
| CUST_399_PI425379931   | Au9.Cre12.g547450 | guanine nucleotide exchange factor                | 1.857 | 1.52E-02 | chromosome_12 | 7531165 | 7538015 | K10848 |
| CUST_390_PI425379931   | Au9.Cre01.g016200 | predicted protein                                 | 1.857 | 4.74E-02 | chromosome_1  | 2538804 | 2544520 |        |
| CUST_4534_PI425379931  | Au9.Cre09.g390700 | exostosin-like glycosyltransferase                | 1.851 | 8.40E-03 | chromosome_9  | 756508  | 766989  |        |
| CUST_5960_PI425379931  | Au9.Cre02.g076200 | aminopeptidase n                                  | 1.846 | 9.46E-03 | chromosome_2  | 425257  | 435962  |        |
| CUST_8954_PI425379931  | Au9.Cre12.g512100 | putative DNA helicase                             | 1.841 | 1.09E-02 | chromosome_12 | 3248917 | 3255278 | K03581 |
| CUST_2735_PI425379931  | Au9.Cre17.g711350 | zinc finger protein 862                           | 1.837 | 1.09E-02 | chromosome_17 | 2013237 | 2017468 | K14311 |
| CUST_8932_PI425379931  | Au9.Cre13.g564750 | 3',5'-cyclic-nucleotide<br>phosphodiesterase      | 1.828 | 2.29E-02 | chromosome_13 | 404017  | 417609  |        |
| CUST_3858_PI425379931  | Au9.Cre03.g194350 | predicted protein                                 | 1.825 | 1.09E-02 | chromosome_3  | 5396768 | 5400523 |        |
| CUST_11754_PI425379931 | Au9.Cre17.g701500 | DnaJ-like protein                                 | 1.824 | 3.41E-02 | chromosome_17 | 763264  | 766734  | K09503 |
| CUST_3445_PI425379931  | Au9.Cre02.g135050 | Flagellar Associated Protein                      | 1.824 | 1.35E-02 | chromosome_2  | 8083560 | 8090589 |        |
| CUST_13658_PI425379931 | Au9.Cre16.g667700 | hypothetical protein<br>CHLREDRAFT_170874         | 1.823 | 1.94E-02 | chromosome_16 | 2799240 | 2805011 |        |
| CUST_929_PI425379931   | Au9.Cre13.g607800 | hypothetical protein<br>CHLREDRAFT_177753         | 1.82  | 2.89E-02 | chromosome_13 | 6553639 | 6560074 |        |
| CUST_12326_PI425379931 | Au9.Cre13.g601550 | mapkk-related serine/threonine<br>protein kinases | 1.817 | 2.75E-02 | chromosome_13 | 5329834 | 5335778 |        |
| CUST_2282_PI425379931  | Au9.Cre01.g010150 | ribosomal biogenesis gtpase                       | 1.817 | 2.63E-02 | chromosome_1  | 1668544 | 1673344 |        |



|                        |                   |                                                        |       |          |               |         |         |        |
|------------------------|-------------------|--------------------------------------------------------|-------|----------|---------------|---------|---------|--------|
| CUST_12659_PI425379931 | Au9.Cre06.g267250 | MAP Kinase Phosphatase 2                               | 1.815 | 1.09E-02 | chromosome_6  | 2304624 | 2314249 | K05766 |
| CUST_13022_PI425379931 | unknown           |                                                        | 1.808 | 4.26E-02 |               |         |         |        |
| CUST_4039_PI425379931  | Au9.Cre13.g592550 | predicted protein                                      | 1.8   | 2.88E-02 | chromosome_13 | 4331941 | 4342396 |        |
| CUST_3743_PI425379931  | Au9.Cre17.g720750 | trf4 poly(A) polymerase                                | 1.799 | 8.40E-03 | chromosome_17 | 3073904 | 3079955 | K03514 |
| CUST_4317_PI425379931  | Au9.Cre10.g440850 | glutathione peroxidase                                 | 1.798 | 4.34E-02 | chromosome_10 | 2954695 | 2959142 | K00432 |
| CUST_13801_PI425379931 | Au9.Cre12.g531200 | multicopper oxidase                                    | 1.796 | 2.72E-02 | chromosome_12 | 5380829 | 5390295 | K14735 |
| CUST_6406_PI425379931  |                   |                                                        | 1.796 | 4.98E-02 |               |         |         |        |
| CUST_8136_PI425379931  | Au9.Cre10.g460700 | calcium/calmodulin-dependent<br>protein kinase-related | 1.791 | 2.29E-02 | chromosome_10 | 5698365 | 5701416 | K13412 |
| CUST_8230_PI425379931  | Au9.Cre02.g082950 | predicted protein                                      | 1.787 | 3.54E-02 | chromosome_2  | 1223484 | 1228349 |        |
| CUST_7795_PI425379931  | Au9.Cre02.g117250 | beta-galactosidase                                     | 1.786 | 4.98E-02 | chromosome_2  | 5691724 | 5699025 | K12308 |
| CUST_11888_PI425379931 | Au9.Cre01.g003900 | predicted protein                                      | 1.781 | 2.88E-02 | chromosome_1  | 730625  | 732438  |        |
| CUST_14_PI425399726    | Au9.Cre12.g513450 | Eta tubulin; was TUH;Eta tubulin;<br>was TUH           | 1.774 | 3.54E-02 | chromosome_12 | 3422074 | 3426335 | K07375 |
| CUST_10528_PI425379931 | Au9.Cre03.g190500 | glycoside-hydrolase-like protein                       | 1.772 | 8.40E-03 | chromosome_3  | 4954965 | 4962646 | K05546 |
| CUST_3311_PI425379931  | Au9.Cre03.g210250 | map microtubule affinity-regulating<br>kinase 3-like   | 1.763 | 4.56E-02 | chromosome_3  | 7552266 | 7557537 |        |
| CUST_6820_PI425379931  | Au9.Cre17.g741150 | serine-threonine protein kinase,                       | 1.761 | 2.11E-02 | chromosome_17 | 6120926 | 6137531 |        |

|                        |                   | plant-type                      |       |          |               |         |         |        |
|------------------------|-------------------|---------------------------------|-------|----------|---------------|---------|---------|--------|
| CUST_12819_PI425379931 | Au9.Cre03.g161100 | importin alpha subunit-related  | 1.75  | 4.26E-02 | chromosome_3  | 1698502 | 1702293 |        |
| CUST_3355_PI425379931  | Au9.Cre16.g661800 | unknown [Picea sitchensis]      | 1.744 | 2.29E-02 | chromosome_16 | 1811503 | 1814356 |        |
| CUST_7232_PI425379931  | Au9.Cre01.g004900 | hypothetical protein            | 1.744 | 1.52E-02 | chromosome_1  | 898457  | 900957  | K01423 |
|                        |                   | CHLREDRAFT_132881               |       |          |               |         |         |        |
| CUST_2753_PI425379931  | Au9.Cre08.g380050 | predicted protein               | 1.743 | 1.09E-02 | chromosome_8  | 3319845 | 3321429 |        |
| CUST_3857_PI425379931  | Au9.Cre17.g742500 | hypothetical protein            | 1.74  | 2.45E-02 | chromosome_17 | 6350617 | 6355925 |        |
|                        |                   | CHLREDRAFT_194227               |       |          |               |         |         |        |
| CUST_4748_PI425379931  | Au9.Cre01.g036250 | calcium/calmodulin-dependent    | 1.74  | 1.52E-02 | chromosome_1  | 5039034 | 5049979 | K12761 |
|                        |                   | protein kinase-related          |       |          |               |         |         |        |
| CUST_4214_PI425379931  | Au9.Cre13.g570750 | Chitinase                       | 1.739 | 1.00E-02 | chromosome_13 | 1251324 | 1253090 |        |
| CUST_11415_PI425379931 | Au9.Cre12.g542900 | serine-threonine protein kinase | 1.735 | 4.26E-02 | chromosome_12 | 7035580 | 7047103 | K04422 |
| CUST_2931_PI425379931  | Au9.Cre17.g703750 | cell polarity protein           | 1.73  | 1.09E-02 | chromosome_17 | 1053941 | 1073122 |        |
| CUST_1865_PI425379931  | Au9.Cre07.g322400 | hypothetical protein            | 1.727 | 4.83E-02 | chromosome_7  | 1376377 | 1379860 |        |
|                        |                   | CHLREDRAFT_142813               |       |          |               |         |         |        |
| CUST_14234_PI425379931 | Au9.Cre01.g030400 |                                 | 1.727 | 1.09E-02 | chromosome_1  | 4296176 | 4297741 |        |
| CUST_8303_PI425379931  | Au9.Cre06.g272250 | hypothetical protein            | 1.726 | 3.56E-02 | chromosome_6  | 2873205 | 2877607 |        |
|                        |                   | CHLREDRAFT_187032               |       |          |               |         |         |        |
| CUST_8074_PI425379931  | Au9.Cre01.g061400 | zinc finger protein 862         | 1.724 | 2.11E-02 | chromosome_1  | 8483491 | 8487746 |        |

|                        |                   |                                                    |       |          |               |         |         |        |
|------------------------|-------------------|----------------------------------------------------|-------|----------|---------------|---------|---------|--------|
| CUST_14101_P1425379931 | Au9.Cre12.g544650 | predicted protein                                  | 1.723 | 1.52E-02 | chromosome_12 | 7204432 | 7211220 |        |
| CUST_6776_P1425379931  | Au9.Cre02.g146650 | Tubulin tyrosine ligase                            | 1.723 | 2.75E-02 | chromosome_2  | 9828365 | 9837750 |        |
| CUST_6437_P1425379931  | Au9.Cre13.g581300 |                                                    | 1.72  | 8.40E-03 | chromosome_13 | 2630395 | 2640390 |        |
| CUST_11336_P1425379931 | Au9.Cre19.g754000 | hypothetical protein                               | 1.718 | 3.93E-02 | scaffold_19   | 343842  | 353511  |        |
|                        |                   | SORBIDRAFT_03g019750                               |       |          |               |         |         |        |
| CUST_3991_P1425379931  | Au9.Cre13.g601450 | Alpha/beta hydrolase                               | 1.715 | 1.05E-02 | chromosome_13 | 5322308 | 5326198 |        |
| CUST_3316_P1425379931  | Au9.Cre05.g236400 | hypothetical protein                               | 1.715 | 2.69E-02 | chromosome_5  | 1352184 | 1359583 |        |
|                        |                   | CHLREDRAFT_192771                                  |       |          |               |         |         |        |
| CUST_6019_P1425379931  | Au9.Cre16.g676000 | hypothetical protein                               | 1.714 | 3.54E-02 | chromosome_16 | 3950584 | 3956239 |        |
|                        |                   | CHLREDRAFT_187397                                  |       |          |               |         |         |        |
| CUST_14265_P1425379931 | Au9.Cre03.g168500 | hypothetical protein                               | 1.711 | 3.19E-02 | chromosome_3  | 2635141 | 2637386 |        |
|                        |                   | MICPUCDRAFT_70223 [Micromonas<br>pusilla CCMP1545] |       |          |               |         |         |        |
| CUST_4615_P1425379931  | Au9.Cre03.g177400 |                                                    | 1.707 | 2.72E-02 | chromosome_3  | 3651037 | 3667477 | K01768 |
| CUST_11345_P1425379931 | Au9.Cre17.g706400 | hypothetical protein                               | 1.695 | 1.52E-02 | chromosome_17 | 1401584 | 1403931 |        |
|                        |                   | CHLREDRAFT_206015                                  |       |          |               |         |         |        |
| CUST_8152_P1425379931  | Au9.Cre04.g225850 | R-SNARE protein, VAMP72-family                     | 1.693 | 4.34E-02 | chromosome_4  | 2309940 | 2313038 | K08515 |
| CUST_6001_P1425379931  | Au9.Cre06.g252600 | hypothetical protein                               | 1.686 | 4.10E-02 | chromosome_6  | 463772  | 468840  |        |
|                        |                   | CHLREDRAFT_187283                                  |       |          |               |         |         |        |

|                        |                   |                                                           |       |          |               |         |         |        |
|------------------------|-------------------|-----------------------------------------------------------|-------|----------|---------------|---------|---------|--------|
| CUST_13574_PI425379931 | Au9.Cre16.g649050 | guanylate cyclase                                         | 1.683 | 2.72E-02 | chromosome_16 | 202678  | 213804  | K12319 |
| CUST_10267_PI425379931 | Au9.Cre01.g017550 | leucine-rich repeat-containing<br>protein                 | 1.679 | 3.17E-02 | chromosome_1  | 2695800 | 2700505 | K13730 |
| CUST_10660_PI425379931 | Au9.Cre01.g028850 | Rhodanese-related sulfurtransferase                       | 1.678 | 4.83E-02 | chromosome_1  | 4124889 | 4126945 |        |
| CUST_57_PI425379931    | Au9.Cre02.g142300 | molybdenum cofactor sulfurase                             | 1.674 | 2.88E-02 | chromosome_2  | 9217220 | 9222628 |        |
| CUST_9898_PI425379931  | Au9.Cre26.g772850 | predicted protein                                         | 1.673 | 4.26E-02 | scaffold_26   | 124321  | 128625  |        |
| CUST_8641_PI425379931  | Au9.Cre12.g553550 | predicted protein                                         | 1.67  | 3.80E-02 | chromosome_12 | 8297578 | 8301830 |        |
| CUST_6694_PI425379931  | Au9.Cre06.g258550 | predicted protein                                         | 1.67  | 1.76E-02 | chromosome_6  | 1327893 | 1339998 |        |
| CUST_10186_PI425379931 | Au9.Cre02.g089750 | predicted protein                                         | 1.669 | 2.75E-02 | chromosome_2  | 2075074 | 2081568 |        |
| CUST_1652_PI425379931  | Au9.Cre17.g714850 | hydroxyproline-rich cell wall protein                     | 1.667 | 3.89E-02 | chromosome_17 | 2358555 | 2360206 |        |
| CUST_1750_PI425379931  | Au9.Cre13.g606600 | cGMP-dependent protein kinase                             | 1.663 | 4.98E-02 | chromosome_13 | 6368859 | 6373329 | K07376 |
| CUST_6876_PI425379931  | Au9.Cre03.g155250 | predicted protein                                         | 1.661 | 3.54E-02 | chromosome_3  | 945734  | 950815  |        |
| CUST_10037_PI425379931 | Au9.Cre10.g431050 | Speract/scavenger receptor,<br>transmembrane glycoprotein | 1.66  | 3.80E-02 | chromosome_10 | 1768896 | 1780745 | K13912 |
| CUST_9267_PI425379931  | Au9.Cre13.g603250 | protein of clr family                                     | 1.657 | 3.54E-02 | chromosome_13 | 5817272 | 5823988 |        |
| CUST_7827_PI425379931  | Au9.Cre02.g088650 | predicted protein                                         | 1.652 | 1.29E-02 | chromosome_2  | 1908245 | 1917993 |        |
| CUST_13133_PI425379931 | Au9.Cre02.g089700 | predicted protein [Micromonas<br>pusilla CCMP1545]        | 1.648 | 3.47E-02 | chromosome_2  | 2066896 | 2074468 |        |

|                        |                   |                                           |       |          |               |         |         |        |
|------------------------|-------------------|-------------------------------------------|-------|----------|---------------|---------|---------|--------|
| CUST_12411_P1425379931 | Au9.Cre14.g608750 | hypothetical protein<br>CHLREDRAFT_179445 | 1.644 | 3.41E-02 | chromosome_14 | 152753  | 156744  |        |
| CUST_8807_P1425379931  | Au9.Cre02.g114900 | ankyrin repeat-containing                 | 1.644 | 2.75E-02 | chromosome_2  | 5407791 | 5413643 | K12460 |
| CUST_11045_P1425379931 | Au9.Cre16.g691350 | hypothetical protein<br>CHLREDRAFT_193706 | 1.642 | 2.72E-02 | chromosome_16 | 5914894 | 5919686 |        |
| CUST_8369_P1425379931  | Au9.Cre12.g512900 | predicted protein                         | 1.64  | 2.83E-02 | chromosome_12 | 3351995 | 3353426 |        |
| CUST_4152_P1425379931  | Au9.Cre17.g700650 | gpr1 fun34 yaah family protein            | 1.639 | 4.26E-02 | chromosome_17 | 662744  | 665017  |        |
| CUST_9190_P1425379931  | Au9.Cre22.g765600 | nitrilase-related                         | 1.636 | 2.89E-02 | scaffold_22   | 413491  | 417287  |        |
| CUST_11963_P1425379931 | Au9.Cre07.g348000 | predicted protein                         | 1.634 | 1.13E-02 | chromosome_7  | 4862510 | 4864029 |        |
| CUST_12014_P1425379931 | Au9.Cre12.g535450 | predicted protein                         | 1.63  | 2.75E-02 | chromosome_12 | 5945782 | 5947999 |        |
| CUST_9767_P1425379931  | Au9.Cre06.g303000 | f-box protein                             | 1.628 | 3.93E-02 | chromosome_6  | 6556413 | 6563495 |        |
| CUST_14007_P1425379931 | Au9.Cre01.g063400 | predicted protein                         | 1.627 | 3.66E-02 | chromosome_1  | 8744103 | 8745320 |        |
| CUST_13672_P1425379931 | Au9.Cre03.g175350 | hypothetical protein<br>CHLREDRAFT_9571   | 1.623 | 2.75E-02 | chromosome_3  | 3407114 | 3411227 |        |
| CUST_14133_P1425379931 | Au9.Cre19.g753200 | predicted protein                         | 1.621 | 2.29E-02 | scaffold_19   | 203709  | 206581  |        |
| CUST_11311_P1425379931 | Au9.Cre16.g657100 | hypothetical protein<br>CHLREDRAFT_185095 | 1.619 | 2.72E-02 | chromosome_16 | 1240610 | 1247304 |        |
| CUST_13808_P1425379931 | Au9.Cre03.g150050 | predicted protein                         | 1.619 | 3.47E-02 | chromosome_3  | 299425  | 302902  |        |

|                        |                   |                                                           |       |          |               |         |         |        |
|------------------------|-------------------|-----------------------------------------------------------|-------|----------|---------------|---------|---------|--------|
| CUST_7384_PI425379931  | Au9.Cre01.g067150 | alpha-2-macroglobulin domain<br>protein                   | 1.615 | 4.74E-02 | chromosome_1  | 9210052 | 9227288 |        |
| CUST_8606_PI425379931  | Au9.Cre10.g446000 | hypothetical protein<br>CHLREDRAFT_93782                  | 1.614 | 2.75E-02 | chromosome_10 | 3670337 | 3676045 |        |
| CUST_4397_PI425379931  | Au9.Cre08.g375000 | dual specificity protein phosphatase                      | 1.614 | 8.40E-03 | chromosome_8  | 2642335 | 2658566 |        |
| CUST_5390_PI425379931  | Au9.Cre10.g432550 | voltage-gated K+ channel, alpha<br>subunit                | 1.613 | 2.43E-02 | chromosome_10 | 1964890 | 1971191 | K04885 |
| CUST_242_PI425379931   | Au9.Cre12.g523050 | Putative T-complex protein 1<br>component                 | 1.609 | 7.71E-03 | chromosome_12 | 4517175 | 4531298 | K00889 |
| CUST_9591_PI425379931  | Au9.Cre12.g542450 | mitochondrial transcription<br>termination factor         | 1.602 | 2.75E-02 | chromosome_12 | 6963796 | 6972808 | K14326 |
| CUST_6886_PI425379931  | Au9.Cre03.g193200 | collagen alpha chain                                      | 1.599 | 8.40E-03 | chromosome_3  | 5289288 | 5291573 |        |
| CUST_14441_PI425379931 | Au9.Cre06.g260500 | WASP-interacting protein<br>VRP1/WIP, contains WH2 domain | 1.595 | 3.17E-02 | chromosome_6  | 1565417 | 1574232 |        |
| CUST_14079_PI425379931 | Au9.Cre13.g586200 | o-linked n-acetylglucosamine<br>transferase, ogt          | 1.593 | 2.45E-02 | chromosome_13 | 3293436 | 3297169 |        |
| CUST_6307_PI425379931  | Au9.Cre06.g307150 | beta-amylase                                              | 1.59  | 1.82E-02 | chromosome_6  | 7100928 | 7104803 | K01177 |
| CUST_8524_PI425379931  | Au9.Cre06.g259600 | subunit of GARP complex                                   | 1.59  | 2.75E-02 | chromosome_6  | 1475015 | 1483867 |        |
| CUST_13962_PI425379931 | Au9.Cre09.g401950 | camp-dependent protein kinase                             | 1.589 | 2.75E-02 | chromosome_9  | 2480041 | 2490697 |        |

| regulatory             |                   |                                  |       |          |               |         |         |        |
|------------------------|-------------------|----------------------------------|-------|----------|---------------|---------|---------|--------|
| CUST_13391_PI425379931 | Au9.Cre08.g383550 | ring zinc finger protein         | 1.586 | 1.09E-02 | chromosome_8  | 3778017 | 3785521 | K11420 |
| CUST_743_PI425379931   | Au9.Cre03.g194300 | Phytoene/squalene synthetase     | 1.582 | 3.80E-02 | chromosome_3  | 5393152 | 5396617 | K02291 |
| CUST_5096_PI425379931  | Au9.Cre12.g515200 | Flagellar Associated Protein     | 1.581 | 2.88E-02 | chromosome_12 | 3633655 | 3636495 |        |
| CUST_10762_PI425379931 | Au9.Cre02.g115800 | hypothetical protein             | 1.577 | 2.72E-02 | chromosome_2  | 5529236 | 5531667 |        |
| CHLREDRAFT_181241      |                   |                                  |       |          |               |         |         |        |
| CUST_4685_PI425379931  | Au9.Cre09.g403800 | Flagellar outer dynein arm heavy | 1.575 | 2.43E-02 | chromosome_9  | 2717292 | 2736929 | K10413 |
| chain beta             |                   |                                  |       |          |               |         |         |        |
| CUST_11780_PI425379931 | Au9.Cre24.g769850 |                                  | 1.574 | 4.26E-02 | scaffold_24   | 149456  | 175867  |        |
| CUST_6425_PI425379931  | Au9.Cre07.g339500 | predicted protein                | 1.567 | 4.26E-02 | chromosome_7  | 3682559 | 3684393 |        |
| CUST_3621_PI425379931  | Au9.Cre12.g549150 | predicted protein                | 1.565 | 2.11E-02 | chromosome_12 | 7716393 | 7720924 |        |
| CUST_2124_PI425379931  | Au9.Cre03.g192050 | Iron permease, membrane protein  | 1.565 | 4.74E-02 | chromosome_3  | 5148490 | 5152439 |        |
| CUST_4734_PI425379931  | Au9.Cre17.g698000 | mitochondrial F1F0 ATP synthase, | 1.563 | 4.86E-02 | chromosome_17 | 263116  | 267695  | K02133 |
| beta subunit           |                   |                                  |       |          |               |         |         |        |
| CUST_3476_PI425379931  | Au9.Cre06.g278500 | tRNA (guanine-N1)-               | 1.562 | 3.80E-02 | chromosome_6  | 3506215 | 3509791 |        |
| methyltransferase      |                   |                                  |       |          |               |         |         |        |
| CUST_8226_PI425379931  | Au9.Cre01.g036700 | calcium/calmodulin-dependent     | 1.552 | 1.96E-02 | chromosome_1  | 5090678 | 5096310 | K13412 |
| protein kinase-related |                   |                                  |       |          |               |         |         |        |
| CUST_6739_PI425379931  | Au9.Cre17.g740100 | hypothetical protein             | 1.55  | 2.09E-02 | chromosome_17 | 5973400 | 5978574 |        |

CHLREDRAFT\_194197

|                        |                   |                                                            |       |          |               |         |         |        |
|------------------------|-------------------|------------------------------------------------------------|-------|----------|---------------|---------|---------|--------|
| CUST_11705_PI425379931 | Au9.Cre03.g154500 | sand family protein                                        | 1.55  | 3.80E-02 | chromosome_3  | 864414  | 869475  |        |
| CUST_13007_PI425379931 | Au9.Cre11.g482950 | serine-threonine protein kinase,<br>plant-type             | 1.548 | 2.75E-02 | chromosome_11 | 2635286 | 2645805 |        |
| CUST_4621_PI425379931  | Au9.Cre41.g786850 | predicted protein                                          | 1.546 | 4.41E-02 | scaffold_41   | 62668   | 68625   |        |
| CUST_13992_PI425379931 | Au9.Cre04.g227450 | phosphate phosphoenolpyruvate<br>translocator-like protein | 1.538 | 8.07E-03 | chromosome_4  | 2539317 | 2545523 |        |
| CUST_6180_PI425379931  | Au9.Cre16.g662850 | eukaryotic initiation factor                               | 1.537 | 3.89E-02 | chromosome_16 | 1951851 | 1955462 |        |
| CUST_4838_PI425379931  | Au9.Cre13.g588600 | kinesin heavy chain                                        | 1.533 | 1.26E-02 | chromosome_13 | 3693197 | 3704861 |        |
| CUST_5115_PI425379931  | Au9.Cre16.g683500 | ATP-dependent RNA helicase                                 | 1.532 | 2.27E-02 | chromosome_16 | 4914143 | 4918618 | K01509 |
| CUST_2551_PI425379931  | Au9.Cre06.g275350 | lhy protein                                                | 1.53  | 2.75E-02 | chromosome_6  | 3120756 | 3130084 | K12133 |
| CUST_8555_PI425379931  |                   |                                                            | 1.53  | 4.26E-02 |               |         |         |        |
| CUST_4046_PI425379931  | Au9.Cre16.g662900 | Signal Peptidase, 12 kDa subunit                           | 1.523 | 2.88E-02 | chromosome_16 | 1955984 | 1956995 |        |
| CUST_482_PI425379931   | Au9.Cre12.g542700 | Mitotic checkpoint protein MAD1                            | 1.523 | 4.74E-02 | chromosome_12 | 7006119 | 7013905 |        |
| CUST_7082_PI425379931  | Au9.Cre13.g583100 |                                                            | 1.521 | 3.89E-02 | chromosome_13 | 2840151 | 2858423 | K02527 |
| CUST_13496_PI425379931 | Au9.Cre03.g207500 | predicted protein                                          | 1.52  | 8.40E-03 | chromosome_3  | 7003315 | 7005880 |        |
| CUST_962_PI425379931   | Au9.Cre13.g581100 | predicted protein                                          | 1.519 | 1.05E-02 | chromosome_13 | 2609951 | 2612813 |        |
| CUST_14430_PI425379931 | Au9.Cre12.g493750 | predicted protein                                          | 1.519 | 1.96E-02 | chromosome_12 | 1333255 | 1343835 |        |



|                        |                   |                                                     |       |          |               |         |         |        |
|------------------------|-------------------|-----------------------------------------------------|-------|----------|---------------|---------|---------|--------|
| CUST_11396_PI425379931 | Au9.Cre02.g082100 | predicted protein                                   | 1.519 | 2.69E-02 | chromosome_2  | 1150758 | 1152734 |        |
| CUST_2065_PI425379931  | Au9.Cre01.g017250 | peptidyl-prolyl cis-trans isomerase,<br>FKBP-type   | 1.519 | 6.85E-03 | chromosome_1  | 2672384 | 2674939 |        |
| CUST_1327_PI425379931  | Au9.Cre12.g524100 | mRNA cap-binding protein                            | 1.517 | 2.75E-02 | chromosome_12 | 4640893 | 4649099 | K12882 |
| CUST_13112_PI425379931 | Au9.Cre32.g781200 | predicted protein                                   | 1.516 | 2.75E-02 | scaffold_32   | 68684   | 78577   |        |
| CUST_11037_PI425379931 | Au9.Cre29.g778450 | predicted protein                                   | 1.515 | 8.40E-03 | scaffold_29   | 124406  | 128019  |        |
| CUST_2342_PI425379931  | Au9.Cre18.g748400 | ribosome binding protein 1                          | 1.512 | 1.09E-02 | scaffold_18   | 799819  | 809314  |        |
| CUST_5266_PI425379931  | Au9.Cre06.g300900 | polyadenylated-RNA export factor                    | 1.512 | 3.47E-02 | chromosome_6  | 6269334 | 6274936 | K06063 |
| CUST_8330_PI425379931  | Au9.Cre07.g334300 | Transient receptor potential ion<br>channel protein | 1.511 | 2.75E-02 | chromosome_7  | 2996976 | 3013586 | K06666 |
| CUST_9195_PI425379931  | Au9.Cre12.g535500 | predicted protein                                   | 1.508 | 2.75E-02 | chromosome_12 | 5949472 | 5954381 |        |
| CUST_8442_PI425379931  | Au9.Cre06.g271150 | Flagellar Associated Protein                        | 1.507 | 3.68E-02 | chromosome_6  | 2767004 | 2778025 |        |
| CUST_11577_PI425379931 | Au9.Cre10.g432850 | Flagellar Associated Protein                        | 1.506 | 3.41E-02 | chromosome_10 | 2001257 | 2003924 |        |
| CUST_4481_PI425379931  | Au9.Cre64.g793100 | presenilin protease                                 | 1.505 | 1.96E-02 | scaffold_64   | 26038   | 32205   |        |
| CUST_5794_PI425379931  | Au9.Cre02.g147650 | mannose-6-phosphate isomerase                       | 1.505 | 4.26E-02 | chromosome_2  | 9932745 | 9936300 | K01809 |
| CUST_13745_PI425379931 | Au9.Cre05.g240900 | hydroxyproline-rich cell wall protein               | 1.504 | 4.98E-02 | chromosome_5  | 2048651 | 2060058 |        |
| CUST_4459_PI425379931  | Au9.Cre07.g317650 | udp-glucose:sterol<br>glucosyltransferase           | 1.503 | 4.26E-02 | chromosome_7  | 751174  | 754200  |        |

|                        |                   |                                                                          |       |          |               |         |         |        |
|------------------------|-------------------|--------------------------------------------------------------------------|-------|----------|---------------|---------|---------|--------|
| CUST_13025_P1425379931 | Au9.Cre14.g613900 | T-type cyclin                                                            | 1.502 | 4.83E-02 | chromosome_14 | 958721  | 962829  | K05868 |
| CUST_4363_P1425379931  | Au9.Cre15.g646050 | serine-threonine protein kinase                                          | 1.498 | 1.52E-02 | chromosome_15 | 2752854 | 2764420 |        |
| CUST_12399_P1425379931 | Au9.Cre07.g327300 | Transcription factor Abd-B, contains<br>HOX domain                       | 1.498 | 4.41E-02 | chromosome_7  | 1911852 | 1920027 |        |
| CUST_14257_P1425379931 | Au9.Cre01.g033600 | helicase ski2w                                                           | 1.498 | 3.68E-02 | chromosome_1  | 4673096 | 4679118 |        |
| CUST_13867_P1425379931 | Au9.Cre12.g560000 |                                                                          | 1.496 | 1.94E-02 | chromosome_12 | 9115640 | 9126695 |        |
| CUST_1928_P1425379931  | Au9.Cre17.g718200 | predicted protein                                                        | 1.495 | 8.40E-03 | chromosome_17 | 2736996 | 2738973 |        |
| CUST_13538_P1425379931 | Au9.Cre01.g058000 | nalp (nacht, leucine rich repeat and<br>pyrin domain containing)-related | 1.495 | 1.05E-02 | chromosome_1  | 8077508 | 8098936 |        |
| CUST_7756_P1425379931  | Au9.Cre17.g740850 | hypothetical protein<br>CHLREDRAFT_194202                                | 1.487 | 1.52E-02 | chromosome_17 | 6095773 | 6102445 |        |
| CUST_7368_P1425379931  | Au9.Cre04.g211950 | exostosin-like glycosyltransferase                                       | 1.487 | 3.80E-02 | chromosome_4  | 54046   | 61891   | K02367 |
| CUST_10096_P1425379931 | Au9.Cre16.g688250 | hypothetical protein<br>CHLREDRAFT_183364                                | 1.486 | 2.75E-02 | chromosome_16 | 5506405 | 5508186 |        |
| CUST_4609_P1425379931  | Au9.Cre12.g549200 | predicted protein                                                        | 1.485 | 2.69E-02 | chromosome_12 | 7720961 | 7727343 |        |
| CUST_4241_P1425379931  | Au9.Cre17.g705200 | predicted protein                                                        | 1.484 | 1.05E-02 | chromosome_17 | 1236167 | 1244159 |        |
| CUST_74_P1425379931    | Au9.Cre16.g688150 | hypothetical protein<br>CHLREDRAFT_183364                                | 1.482 | 2.75E-02 | chromosome_16 | 5498889 | 5502745 |        |
| CUST_11755_P1425379931 | Au9.Cre02.g109050 | hypothetical protein                                                     | 1.48  | 2.75E-02 | chromosome_2  | 4684768 | 4691924 |        |

|                        |                   |                                                         |       |          |               |         |         |        |  |
|------------------------|-------------------|---------------------------------------------------------|-------|----------|---------------|---------|---------|--------|--|
|                        |                   | CHLREDRAFT_186812                                       |       |          |               |         |         |        |  |
| CUST_9883_P1425379931  | Au9.Cre05.g239000 | hypothetical protein                                    | 1.478 | 2.75E-02 | chromosome_5  | 1757252 | 1772483 |        |  |
|                        |                   | CHLREDRAFT_176384                                       |       |          |               |         |         |        |  |
| CUST_9067_P1425379931  | Au9.Cre13.g604600 | predicted protein [Physcomitrella patens subsp. patens] | 1.477 | 3.41E-02 | chromosome_13 | 6092486 | 6100267 |        |  |
| CUST_14090_P1425379931 | Au9.Cre02.g108350 | myb transcription factor 1                              | 1.473 | 4.56E-02 | chromosome_2  | 4609342 | 4616129 | K12823 |  |
| CUST_4394_P1425379931  | Au9.Cre24.g768800 | sirtuin type partial                                    | 1.472 | 2.29E-02 | scaffold_24   | 29456   | 36857   |        |  |
| CUST_2874_P1425379931  | Au9.Cre13.g591800 | predicted protein                                       | 1.472 | 3.80E-02 | chromosome_13 | 4253323 | 4259221 |        |  |
| CUST_4196_P1425379931  | Au9.Cre08.g361900 | flagellar associated protein                            | 1.472 | 4.05E-02 | chromosome_8  | 546177  | 553211  |        |  |
| CUST_5248_P1425379931  | Au9.Cre13.g576300 | gamma-secretase accessory subunit                       | 1.47  | 3.12E-02 | chromosome_13 | 1930690 | 1933207 | K06172 |  |
| CUST_5680_P1425379931  | Au9.Cre06.g310000 | Epsilon4-Adaptin                                        | 1.47  | 2.11E-02 | chromosome_6  | 7456500 | 7463841 | K12400 |  |
| CUST_2658_P1425379931  | Au9.Cre02.g124500 | protein of clr family                                   | 1.47  | 2.83E-02 | chromosome_2  | 6553998 | 6560872 |        |  |
| CUST_7990_P1425379931  | Au9.Cre12.g491000 | predicted protein                                       | 1.469 | 3.80E-02 | chromosome_12 | 950069  | 956220  |        |  |
| CUST_12263_P1425379931 | Au9.Cre04.g223900 | transcription factor ccaat displacement protein cdp1    | 1.468 | 2.75E-02 | chromosome_4  | 1975643 | 1985678 |        |  |
| CUST_6564_P1425379931  | Au9.Cre12.g533500 |                                                         | 1.466 | 4.65E-02 | chromosome_12 | 5687017 | 5705865 | K01768 |  |
| CUST_13032_P1425379931 | Au9.Cre03.g159950 | nucleolar protein 10                                    | 1.466 | 3.89E-02 | chromosome_3  | 1545478 | 1552193 |        |  |
| CUST_8358_P1425379931  | Au9.Cre06.g306200 | hypothetical protein                                    | 1.463 | 6.85E-03 | chromosome_6  | 7005390 | 7008426 |        |  |

CHLREDRAFT\_144900

|                        |                   |                                                 |       |          |               |         |         |        |
|------------------------|-------------------|-------------------------------------------------|-------|----------|---------------|---------|---------|--------|
| CUST_7314_PI425379931  | Au9.Cre02.g145500 | Serine/threonine protein kinase                 | 1.459 | 4.34E-02 | chromosome_2  | 9669431 | 9675649 | K04422 |
| CUST_4542_PI425379931  | Au9.Cre14.g630050 | Calcium-responsive transcription<br>coactivator | 1.455 | 3.89E-02 | chromosome_14 | 3298133 | 3304644 |        |
| CUST_1279_PI425379931  | Au9.Cre03.g188000 | hypothetical protein                            | 1.455 | 4.26E-02 | chromosome_3  | 4704365 | 4714693 |        |
| CHLREDRAFT_189210      |                   |                                                 |       |          |               |         |         |        |
| CUST_8480_PI425379931  | Au9.Cre26.g773050 | predicted protein                               | 1.454 | 3.41E-02 | scaffold_26   | 142906  | 144272  |        |
| CUST_9782_PI425379931  | Au9.Cre16.g695150 | ribosome binding protein 1                      | 1.453 | 1.94E-02 | chromosome_16 | 6458871 | 6465113 |        |
| CUST_729_PI425379931   | Au9.Cre06.g287150 | leucine-rich repeat-containing 50<br>protein    | 1.453 | 2.11E-02 | chromosome_6  | 4407655 | 4420959 | K01768 |
| CUST_2388_PI425379931  | Au9.Cre10.g449300 | ribosome binding protein 1                      | 1.452 | 2.75E-02 | chromosome_10 | 4035434 | 4043729 |        |
| CUST_1170_PI425379931  | Au9.Cre17.g721950 | Predicted E3 ubiquitin ligase                   | 1.447 | 3.89E-02 | chromosome_17 | 3197930 | 3202959 | K04556 |
| CUST_10252_PI425379931 | Au9.Cre01.g040650 | predicted protein                               | 1.443 | 4.26E-02 | chromosome_1  | 5540386 | 5548521 |        |
| CUST_3866_PI425379931  | Au9.Cre08.g375150 | ankyrin repeat domain-containing<br>protein     | 1.442 | 2.75E-02 | chromosome_8  | 2672329 | 2680974 |        |
| CUST_169_PI425379931   | Au9.Cre10.g449200 | ankyrin repeat-containing                       | 1.44  | 2.29E-02 | chromosome_10 | 4008220 | 4023129 | K08803 |
| CUST_5638_PI425379931  | Au9.Cre18.g749650 | ClpB chaperone, Hsp100 family                   | 1.436 | 4.56E-02 | scaffold_18   | 969556  | 980002  |        |
| CUST_12_PI425379931    | Au9.Cre01.g052250 | Thioredoxin x                                   | 1.432 | 3.89E-02 | chromosome_1  | 7229531 | 7231320 | K00384 |

|                        |                   |                                           |       |          |               |         |         |        |
|------------------------|-------------------|-------------------------------------------|-------|----------|---------------|---------|---------|--------|
| CUST_14613_P1425379931 | Au9.Cre09.g394550 | Ribose-phosphate<br>pyrophosphokinase     | 1.429 | 2.75E-02 | chromosome_9  | 1326185 | 1330003 | K00948 |
| CUST_2462_P1425379931  | Au9.Cre09.g412650 | hypothetical protein<br>CHLREDRAFT_150019 | 1.428 | 3.89E-02 | chromosome_9  | 4050971 | 4056156 |        |
| CUST_7980_P1425379931  | Au9.Cre01.g050650 | hypothetical protein<br>CHLREDRAFT_195864 | 1.428 | 2.75E-02 | chromosome_1  | 6960456 | 6969312 |        |
| CUST_7859_P1425379931  | Au9.Cre15.g636250 | predicted protein                         | 1.427 | 2.75E-02 | chromosome_15 | 436298  | 444556  |        |
| CUST_9655_P1425379931  | Au9.Cre09.g399650 | predicted protein                         | 1.425 | 2.72E-02 | chromosome_9  | 2084828 | 2088470 |        |
| CUST_11933_P1425379931 | Au9.Cre07.g330700 | Flagellar Associated Protein              | 1.425 | 3.89E-02 | chromosome_7  | 2344849 | 2350473 |        |
| CUST_8937_P1425379931  | Au9.Cre05.g236200 | ctr1-like protein kinase                  | 1.425 | 4.10E-02 | chromosome_5  | 1309394 | 1325165 |        |
| CUST_5078_P1425379931  | Au9.Cre29.g778350 | predicted protein                         | 1.424 | 2.45E-02 | scaffold_29   | 112507  | 114755  |        |
| CUST_7204_P1425379931  | Au9.Cre01.g000600 | WD-40 repeat family protein               | 1.422 | 2.75E-02 | chromosome_1  | 68193   | 73415   | K01062 |
| CUST_176_P1425379931   | Au9.Cre12.g515250 | hypothetical protein<br>TcasGA2_TC005512  | 1.42  | 2.11E-02 | chromosome_12 | 3636647 | 3642758 |        |
| CUST_6941_P1425379931  | Au9.Cre06.g268800 | Flagellar Associated Protein              | 1.416 | 2.11E-02 | chromosome_6  | 2451568 | 2466025 |        |
| CUST_8204_P1425379931  | Au9.Cre05.g240100 | hypothetical protein<br>CHLREDRAFT_150899 | 1.415 | 4.65E-02 | chromosome_5  | 1919682 | 1928593 |        |
| CUST_2919_P1425379931  | Au9.Cre07.g325750 | Flagellar Associated Protein              | 1.413 | 3.80E-02 | chromosome_7  | 1732123 | 1742939 | K12196 |
| CUST_3066_P1425379931  | Au9.Cre08.g363600 | drug metabolite transporter               | 1.408 | 8.40E-03 | chromosome_8  | 881353  | 885314  |        |

| superfamily            |                   |                                                              |       |          |               |         |         |        |
|------------------------|-------------------|--------------------------------------------------------------|-------|----------|---------------|---------|---------|--------|
| CUST_6308_P1425379931  | Au9.Cre14.g618950 | predicted protein                                            | 1.406 | 2.72E-02 | chromosome_14 | 1623085 | 1626852 |        |
| CUST_1077_P1425379931  | Au9.Cre08.g382100 | predicted protein                                            | 1.403 | 3.80E-02 | chromosome_8  | 3561879 | 3571100 |        |
| CUST_8707_P1425379931  | Au9.Cre01.g061100 | NADH:ubiquinone oxidoreductase                               | 1.399 | 3.54E-02 | chromosome_1  | 8452416 | 8454693 |        |
| 18 kDa subunit         |                   |                                                              |       |          |               |         |         |        |
| CUST_13936_P1425379931 | Au9.Cre16.g664200 | 3',5'-cyclic-nucleotide                                      | 1.397 | 4.83E-02 | chromosome_16 | 2148295 | 2155963 | K13755 |
| phosphodiesterase      |                   |                                                              |       |          |               |         |         |        |
| CUST_6497_P1425379931  | Au9.Cre12.g518550 | Flagellar Associated Protein                                 | 1.395 | 4.98E-02 | chromosome_12 | 4049633 | 4063568 |        |
| CUST_8531_P1425379931  | Au9.Cre06.g309350 | KDEL receptor-like protein                                   | 1.395 | 4.86E-02 | chromosome_6  | 7318801 | 7321802 | K10949 |
| CUST_14373_P1425379931 | Au9.Cre02.g091150 | COP-II coat subunit                                          | 1.392 | 3.17E-02 | chromosome_2  | 2273640 | 2282841 | K14007 |
| CUST_11847_P1425379931 | Au9.Cre16.g649500 | hypothetical protein                                         | 1.388 | 4.74E-02 | chromosome_16 | 268387  | 271664  |        |
| CHLREDRAFT_193199      |                   |                                                              |       |          |               |         |         |        |
| CUST_4706_P1425379931  | Au9.Cre17.g723150 | endoplasmic reticulum                                        | 1.374 | 3.89E-02 | chromosome_17 | 3308159 | 3312896 | K10976 |
| oxidoreductin 1        |                   |                                                              |       |          |               |         |         |        |
| CUST_12958_P1425379931 | Au9.Cre07.g354650 |                                                              | 1.374 | 4.26E-02 | chromosome_7  | 5745748 | 5760452 |        |
| CUST_7353_P1425379931  | Au9.Cre03.g151000 | Dual-Specificity Protein Phosphatase                         | 1.363 | 3.54E-02 | chromosome_3  | 439405  | 444695  | K07199 |
| 8                      |                   |                                                              |       |          |               |         |         |        |
| CUST_4043_P1425379931  | Au9.Cre02.g145100 | Flagellar Associated Protein,<br>calcium-transporting ATPase | 1.361 | 4.26E-02 | chromosome_2  | 9605508 | 9616745 | K05850 |

|                        |                   |                                                |       |          |               |         |         |        |
|------------------------|-------------------|------------------------------------------------|-------|----------|---------------|---------|---------|--------|
| CUST_7443_PI425379931  | Au9.Cre12.g488550 | DNA methylase in the FkbM family               | 1.359 | 3.80E-02 | chromosome_12 | 648989  | 654789  |        |
| CUST_1589_PI425379931  | Au9.Cre12.g484250 | Flagellar inner arm dynein 1 heavy chain alpha | 1.359 | 3.54E-02 | chromosome_12 | 113086  | 133222  | K10413 |
| CUST_11745_PI425379931 | Au9.Cre01.g040850 | predicted protein                              | 1.359 | 4.83E-02 | chromosome_1  | 5556413 | 5570101 |        |
| CUST_12143_PI425379931 | Au9.Cre06.g278900 | predicted protein                              | 1.351 | 2.75E-02 | chromosome_6  | 3536435 | 3541162 |        |
| CUST_4617_PI425379931  | Au9.Cre06.g267550 | Bardet-Biedl syndrome 5 protein                | 1.35  | 4.26E-02 | chromosome_6  | 2344726 | 2348059 |        |
| CUST_11421_PI425379931 | Au9.Cre12.g546650 | Ubiquitin-conjugating enzyme E2                | 1.349 | 2.75E-02 | chromosome_12 | 7423559 | 7426500 | K10575 |
| CUST_3588_PI425379931  | Au9.Cre09.g416450 | hypothetical protein<br>CHLREDRAFT_192167      | 1.349 | 3.66E-02 | chromosome_9  | 4586897 | 4589947 |        |
| CUST_9805_PI425379931  | Au9.Cre16.g685600 | hypothetical protein<br>CHLREDRAFT_170787      | 1.344 | 2.72E-02 | chromosome_16 | 5144659 | 5151138 |        |
| CUST_1434_PI425379931  | Au9.Cre16.g672100 | hypothetical protein<br>CHLREDRAFT_174455      | 1.342 | 3.80E-02 | chromosome_16 | 3374193 | 3383450 |        |
| CUST_13475_PI425379931 | Au9.Cre01.g018150 | protein-s isoprenylcysteine o-                 | 1.341 | 4.26E-02 | chromosome_1  | 2774980 | 2778331 |        |
| CUST_11248_PI425379931 | Au9.Cre16.g654350 | splicing factor-like protein                   | 1.34  | 3.54E-02 | chromosome_16 | 829237  | 833701  |        |
| CUST_3983_PI425379931  | Au9.Cre20.g758500 | Puf protein                                    | 1.334 | 3.47E-02 | scaffold_20   | 153595  | 161965  |        |
| CUST_10699_PI425379931 | Au9.Cre12.g537200 | 2-oxoglutarate dehydrogenase, E1 subunit       | 1.315 | 3.68E-02 | chromosome_12 | 6166447 | 6178148 | K00164 |
| CUST_5513_PI425379931  | Au9.Cre02.g081800 | predicted protein                              | 1.314 | 4.98E-02 | chromosome_2  | 1105416 | 1118575 | K01768 |

|                        |                   |                                                  |       |          |               |         |         |        |
|------------------------|-------------------|--------------------------------------------------|-------|----------|---------------|---------|---------|--------|
| CUST_1780_PI425379931  | Au9.Cre10.g434450 | NADH:ubiquinone oxidoreductase<br>39 kDa subunit | 1.284 | 4.83E-02 | chromosome_10 | 2238872 | 2241969 | K03953 |
| CUST_6108_PI425379931  | Au9.Cre26.g772450 | Adenylate Kinase 1                               | 1.273 | 3.41E-02 | scaffold_26   | 78900   | 84197   |        |
| CUST_8251_PI425379931  | Au9.Cre01.g010900 | Glyceraldehyde-3-Phosphate<br>Dehydrogenase      | 0.788 | 2.88E-02 | chromosome_1  | 1847708 | 1850334 |        |
| CUST_6858_PI425379931  | Au9.Cre08.g378050 | NADH:ubiquinone oxidoreductase<br>16 kDa subunit | 0.786 | 4.34E-02 | chromosome_8  | 3053188 | 3055056 |        |
| CUST_12355_PI425379931 | Au9.Cre01.g015750 | nipsnap-related                                  | 0.784 | 3.54E-02 | chromosome_1  | 2490484 | 2493613 |        |
| CUST_8075_PI425379931  | Au9.Cre11.g472200 | split hand foot malformation type 1              | 0.777 | 4.56E-02 | chromosome_11 | 848137  | 849689  |        |
| CUST_13178_PI425379931 | Au9.Cre10.g465300 |                                                  | 0.77  | 4.65E-02 | chromosome_10 | 6309277 | 6328456 | K01768 |
| CUST_13673_PI425379931 | Au9.Cre10.g447500 | kinesin motor domain containing<br>protein       | 0.769 | 2.53E-02 | chromosome_10 | 3830929 | 3836684 |        |
| CUST_8536_PI425379931  | Au9.Cre07.g321100 | xylulokinase                                     | 0.769 | 3.89E-02 | chromosome_7  | 1184370 | 1189205 | K00854 |
| CUST_7882_PI425379931  | Au9.Cre01.g072950 | DnaJ-like protein                                | 0.768 | 3.41E-02 | chromosome_1  | 9951374 | 9954189 |        |
| CUST_7188_PI425379931  | Au9.Cre12.g500100 | predicted protein                                | 0.765 | 3.04E-02 | chromosome_12 | 1974576 | 1977937 |        |
| CUST_9533_PI425379931  | Au9.Cre02.g088750 | ATM/ATR-like kinase                              | 0.761 | 3.93E-02 | chromosome_2  | 1921922 | 1949144 |        |
| CUST_8730_PI425379931  | Au9.Cre08.g379550 | major facilitator superfamily protein            | 0.759 | 4.05E-02 | chromosome_8  | 3239215 | 3245032 | K12301 |
| CUST_4768_PI425379931  | Au9.Cre03.g186650 | hypothetical protein<br>CHLREDRAFT_189197        | 0.758 | 3.29E-02 | chromosome_3  | 4563179 | 4565678 |        |



|                        |                   |                                                  |       |          |               |         |         |        |
|------------------------|-------------------|--------------------------------------------------|-------|----------|---------------|---------|---------|--------|
| CUST_1302_P1425379931  | Au9.Cre09.g413650 | hypothetical protein<br>CHLREDRAFT_150040        | 0.757 | 1.59E-02 | chromosome_9  | 4250333 | 4257398 |        |
| CUST_2704_P1425379931  | Au9.Cre03.g168250 | predicted protein                                | 0.756 | 4.83E-02 | chromosome_3  | 2609149 | 2612084 |        |
| CUST_10486_P1425379931 | Au9.Cre05.g233050 | Flagellar Associated Protein                     | 0.755 | 1.83E-02 | chromosome_5  | 645254  | 646405  |        |
| CUST_13901_P1425379931 | Au9.Cre07.g326400 | golgi membrane protein yip1                      | 0.751 | 4.86E-02 | chromosome_7  | 1805752 | 1808683 |        |
| CUST_8967_P1425379931  | Au9.Cre17.g737000 | hypothetical protein<br>CHLREDRAFT_159618        | 0.75  | 2.69E-02 | chromosome_17 | 5487192 | 5488864 |        |
| CUST_3285_P1425379931  | Au9.Cre16.g679500 | NADH:ubiquinone oxidoreductase<br>11 kDa subunit | 0.75  | 3.12E-02 | chromosome_16 | 4389787 | 4391753 | K03946 |
| CUST_5276_P1425379931  | Au9.Cre13.g566850 | SOUL heme-binding protein                        | 0.749 | 3.68E-02 | chromosome_13 | 732956  | 735360  |        |
| CUST_1084_P1425379931  | Au9.Cre08.g374100 | hypothetical protein ACLA_028940                 | 0.748 | 4.98E-02 | chromosome_8  | 2491753 | 2496174 |        |
| CUST_11544_P1425379931 | Au9.Cre03.g185550 | Sedoheptulose-1,7-bisphosphatase                 | 0.745 | 3.12E-02 | chromosome_3  | 4474617 | 4477233 | K01100 |
| CUST_222_P1425379931   | Au9.Cre10.g448000 | hypothetical protein<br>CHLREDRAFT_187618        | 0.742 | 2.69E-02 | chromosome_10 | 3888944 | 3891264 |        |
| CUST_11237_P1425379931 | Au9.Cre04.g220500 | hypothetical protein<br>CHLREDRAFT_189397        | 0.742 | 2.66E-02 | chromosome_4  | 1491271 | 1492379 |        |
| CUST_4869_P1425379931  | Au9.Cre13.g597450 | glutaredoxin-like protein                        | 0.74  | 3.89E-02 | chromosome_13 | 4888466 | 4892709 |        |
| CUST_5811_P1425379931  | Au9.Cre12.g490450 | predicted protein                                | 0.74  | 1.09E-02 | chromosome_12 | 889052  | 891167  |        |
| CUST_12001_P1425379931 | Au9.Cre06.g280650 | predicted protein                                | 0.74  | 3.19E-02 | chromosome_6  | 3747413 | 3749761 |        |

|                        |                   |                                                                                                                                                                                                                                                                          |       |          |               |         |         |        |
|------------------------|-------------------|--------------------------------------------------------------------------------------------------------------------------------------------------------------------------------------------------------------------------------------------------------------------------|-------|----------|---------------|---------|---------|--------|
| CUST_11691_PI425379931 | Au9.Cre25.g770800 | ser thr protein kinase                                                                                                                                                                                                                                                   | 0.739 | 3.04E-02 | scaffold_25   | 9850    | 29175   |        |
| CUST_8794_PI425379931  | Au9.Cre01.g013550 | Amphiphysin                                                                                                                                                                                                                                                              | 0.739 | 2.24E-02 | chromosome_1  | 2241260 | 2245020 | K10352 |
| CUST_7127_PI425379931  | Au9.Cre01.g042550 | predicted protein                                                                                                                                                                                                                                                        | 0.738 | 2.10E-02 | chromosome_1  | 5862841 | 5868205 |        |
| CUST_5705_PI425379931  | Au9.Cre15.g635600 | Nascent polypeptide associated-<br>complex, alpha subunit                                                                                                                                                                                                                | 0.737 | 2.72E-02 | chromosome_15 | 290257  | 293388  |        |
| CUST_7701_PI425379931  | Au9.Cre17.g724600 | Pheophorbide a oxygenase; Rieske<br>iron-sulfur cluster<br>protein;Pheophorbide a oxygenase;<br>Rieske iron-sulfur cluster<br>protein;Pheophorbide a oxygenase;<br>Rieske iron-sulfur cluster<br>protein;Pheophorbide a oxygenase;<br>Rieske iron-sulfur cluster protein | 0.735 | 4.86E-02 | chromosome_17 | 3454799 | 3459056 | K13071 |
| CUST_1010_PI425379931  | Au9.Cre02.g078700 | Jumonji protein                                                                                                                                                                                                                                                          | 0.735 | 4.34E-02 | chromosome_2  | 747271  | 753298  |        |
| CUST_244_PI425379931   | Au9.Cre01.g066450 | Small ubiquitin-like modifier                                                                                                                                                                                                                                            | 0.735 | 3.93E-02 | chromosome_1  | 9065055 | 9066665 |        |
| CUST_2943_PI425379931  | Au9.Cre74.g795150 | Dipeptidyl<br>aminopeptidases/acylaminoacyl-<br>peptidases (ISS)                                                                                                                                                                                                         | 0.733 | 4.34E-02 | scaffold_74   | 1       | 6499    |        |
| CUST_2099_PI425379931  | Au9.Cre01.g050900 | glycosyl family 2                                                                                                                                                                                                                                                        | 0.732 | 4.05E-02 | chromosome_1  | 6996826 | 6999424 | K00754 |

|                        |                   |                                      |       |          |               |         |         |        |
|------------------------|-------------------|--------------------------------------|-------|----------|---------------|---------|---------|--------|
| CUST_13015_P1425379931 | Au9.Cre17.g725300 | Splicing factor 3b, subunit 4        | 0.73  | 4.98E-02 | chromosome_17 | 3550249 | 3554735 | K12887 |
| CUST_9077_P1425379931  | Au9.Cre07.g329700 | 26S proteasome regulatory subunit    | 0.73  | 1.56E-02 | chromosome_7  | 2209273 | 2214999 | K03062 |
| CUST_9453_P1425379931  | Au9.Cre04.g228600 | hypothetical protein                 | 0.73  | 3.19E-02 | chromosome_4  | 2780783 | 2784976 |        |
|                        |                   | CHLREDRAFT_189488                    |       |          |               |         |         |        |
| CUST_579_P1425379931   | Au9.Cre13.g582250 | glycosyl hydrolase family 85 protein | 0.729 | 3.56E-02 | chromosome_13 | 2728617 | 2737323 | K01227 |
| CUST_5972_P1425379931  | Au9.Cre03.g211000 | Mitochondrial FAD carrier protein    | 0.729 | 3.89E-02 | chromosome_3  | 7684988 | 7689375 |        |
| CUST_7835_P1425379931  | Au9.Cre04.g216300 | hypothetical protein                 | 0.728 | 3.89E-02 | chromosome_4  | 771800  | 774644  |        |
|                        |                   | CHLREDRAFT_185179                    |       |          |               |         |         |        |
| CUST_1908_P1425379931  | Au9.Cre01.g002000 | hypothetical protein                 | 0.727 | 8.07E-03 | chromosome_1  | 310051  | 314190  |        |
|                        |                   | CHLREDRAFT_193344                    |       |          |               |         |         |        |
| CUST_5855_P1425379931  | Au9.Cre18.g751500 | udp-sugar diphosphatase              | 0.726 | 3.29E-02 | scaffold_18   | 1245967 | 1249703 |        |
| CUST_3576_P1425379931  | Au9.Cre03.g189950 | HSP70-HSP90 organizing protein       | 0.726 | 2.11E-02 | chromosome_3  | 4882142 | 4887102 | K09553 |
| CUST_7520_P1425379931  | Au9.Cre02.g138100 | hypothetical protein                 | 0.726 | 1.59E-02 | chromosome_2  | 8610767 | 8613229 |        |
|                        |                   | CHLREDRAFT_192792                    |       |          |               |         |         |        |
| CUST_14299_P1425379931 | Au9.Cre10.g449900 | predicted protein                    | 0.724 | 3.68E-02 | chromosome_10 | 4168847 | 4171741 |        |
| CUST_11138_P1425379931 | Au9.Cre13.g598750 | Phosphoglucomutase                   | 0.723 | 3.89E-02 | chromosome_13 | 5032040 | 5037797 |        |
| CUST_10600_P1425379931 | Au9.Cre06.g281300 | predicted protein                    | 0.723 | 9.24E-03 | chromosome_6  | 3806036 | 3807731 |        |
| CUST_5777_P1425379931  | Au9.Cre03.g161000 | Adenosine/AMP deaminase              | 0.723 | 1.85E-02 | chromosome_3  | 1687332 | 1691953 | K01488 |

|                        |                   |                                                     |       |          |               |         |         |        |
|------------------------|-------------------|-----------------------------------------------------|-------|----------|---------------|---------|---------|--------|
| CUST_9887_PI425379931  | Au9.Cre12.g527850 | Translin-like protein                               | 0.722 | 3.66E-02 | chromosome_12 | 5063495 | 5066955 |        |
| CUST_3488_PI425379931  | Au9.Cre11.g481450 | CF0 ATP synthase subunit II precursor               | 0.722 | 1.82E-02 | chromosome_11 | 2450939 | 2452185 | K02109 |
| CUST_1158_PI425379931  | Au9.Cre06.g300950 | hypothetical protein<br>CHLREDRAFT_188910           | 0.722 | 7.97E-03 | chromosome_6  | 6277867 | 6279757 |        |
| CUST_867_PI425379931   | Au9.Cre01.g037800 | thioredoxin-like ATP binding protein<br>2           | 0.721 | 2.43E-02 | chromosome_1  | 5212491 | 5214962 |        |
| CUST_12604_PI425379931 | Au9.Cre06.g282250 | acetyltransferase-related                           | 0.72  | 1.73E-02 | chromosome_6  | 3900123 | 3907354 |        |
| CUST_6413_PI425379931  | Au9.Cre02.g088000 | prohibitin                                          | 0.72  | 1.22E-02 | chromosome_2  | 1827090 | 1831709 |        |
| CUST_11071_PI425379931 | Au9.Cre16.g657600 | hypothetical protein<br>CHLREDRAFT_176937           | 0.718 | 4.74E-02 | chromosome_16 | 1284225 | 1287382 |        |
| CUST_12235_PI425379931 | Au9.Cre06.g302750 | Serine/threonine kinase receptor-associated protein | 0.718 | 2.63E-02 | chromosome_6  | 6529833 | 6533710 | K13137 |
| CUST_7481_PI425379931  | Au9.Cre16.g661250 | hypothetical protein<br>CHLREDRAFT_193085           | 0.717 | 4.59E-02 | chromosome_16 | 1728503 | 1732699 | K03406 |
| CUST_12839_PI425379931 | Au9.Cre03.g190400 | hypothetical protein<br>CHLREDRAFT_170664           | 0.717 | 1.91E-02 | chromosome_3  | 4945316 | 4949040 |        |
| CUST_8214_PI425379931  | Au9.Cre12.g548200 | predicted protein                                   | 0.716 | 3.12E-02 | chromosome_12 | 7630023 | 7635614 |        |
| CUST_12648_PI425379931 | Au9.Cre03.g190300 | hypothetical protein                                | 0.716 | 1.46E-02 | chromosome_3  | 4932629 | 4936406 |        |

CHLREDRAFT\_170664

|                        |                   |                                                   |       |          |               |         |         |        |
|------------------------|-------------------|---------------------------------------------------|-------|----------|---------------|---------|---------|--------|
| CUST_12509_PI425379931 | Au9.Cre03.g198300 | pol-like protein                                  | 0.714 | 3.29E-02 | chromosome_3  | 5796409 | 5800594 |        |
| CUST_2295_PI425379931  | Au9.Cre02.g092150 | peptidyl-prolyl cis-trans isomerase,<br>FKBP-type | 0.714 | 2.66E-02 | chromosome_2  | 2391898 | 2396085 | K13730 |
| CUST_10439_PI425379931 | Au9.Cre17.g715500 | tsa family                                        | 0.713 | 2.10E-02 | chromosome_17 | 2416477 | 2419166 |        |
| CUST_9725_PI425379931  | Au9.Cre12.g513750 | Glutaredoxin, CPYC type                           | 0.713 | 2.27E-02 | chromosome_12 | 3449754 | 3451325 | K00384 |
| CUST_11839_PI425379931 | Au9.Cre01.g061700 | Exportin                                          | 0.713 | 1.59E-02 | chromosome_1  | 8526743 | 8535620 |        |
| CUST_12651_PI425379931 | Au9.Cre03.g196450 | Paf1 complex component                            | 0.711 | 1.36E-02 | chromosome_3  | 5595355 | 5599826 |        |
| CUST_8953_PI425379931  | Au9.Cre08.g363450 | hypothetical protein                              | 0.71  | 2.89E-02 | chromosome_8  | 871693  | 876350  |        |
| CHLREDRAFT_192211      |                   |                                                   |       |          |               |         |         |        |
| CUST_2545_PI425379931  | Au9.Cre23.g766950 | bax inhibitor-related                             | 0.709 | 4.26E-02 | scaffold_23   | 152184  | 154787  |        |
| CUST_13927_PI425379931 | Au9.Cre06.g253350 | glycine cleavage system, H-protein                | 0.709 | 4.44E-02 | chromosome_6  | 612257  | 614003  |        |
| CUST_4218_PI425379931  | Au9.Cre05.g232000 | chaperone protein                                 | 0.709 | 4.34E-02 | chromosome_5  | 448396  | 453871  | K14002 |
| CUST_2854_PI425379931  | Au9.Cre09.g392650 | ring finger protein 32                            | 0.708 | 2.65E-02 | chromosome_9  | 1067714 | 1073207 | K10601 |
| CUST_14149_PI425379931 | Au9.Cre03.g171300 | Glycolate oxidase                                 | 0.707 | 3.41E-02 | chromosome_3  | 2939945 | 2943466 | K11517 |
| CUST_2891_PI425379931  | Au9.Cre06.g256450 | Flagellar Associated Protein                      | 0.706 | 4.74E-02 | chromosome_6  | 1065275 | 1067726 |        |
| CUST_7986_PI425379931  | Au9.Cre02.g115900 | hypothetical protein                              | 0.706 | 1.71E-02 | chromosome_2  | 5536033 | 5538522 |        |
| CHLREDRAFT_181241      |                   |                                                   |       |          |               |         |         |        |

|                        |                   |                                                                                                                                                                                                                                                     |       |          |               |         |         |        |
|------------------------|-------------------|-----------------------------------------------------------------------------------------------------------------------------------------------------------------------------------------------------------------------------------------------------|-------|----------|---------------|---------|---------|--------|
| CUST_5073_PI425379931  | Au9.Cre54.g790800 | pol-like protein                                                                                                                                                                                                                                    | 0.704 | 3.89E-02 | scaffold_54   | 34116   | 50102   |        |
| CUST_13115_PI425379931 | Au9.Cre10.g419950 | mitogen activated protein kinase<br>kinase kinase 9                                                                                                                                                                                                 | 0.704 | 3.68E-02 | chromosome_10 | 300190  | 306946  |        |
| CUST_8870_PI425379931  | Au9.Cre08.g377100 | Adenylate Kinase 6                                                                                                                                                                                                                                  | 0.704 | 1.12E-02 | chromosome_8  | 2891311 | 2895166 | K00939 |
| CUST_4185_PI425379931  | Au9.Cre13.g601850 | pol-like protein                                                                                                                                                                                                                                    | 0.703 | 7.79E-03 | chromosome_13 | 5365288 | 5366259 |        |
| CUST_2176_PI425379931  | Au9.Cre13.g570900 | Peptide methionine-S-sulfoxide<br>reductase                                                                                                                                                                                                         | 0.703 | 2.91E-02 | chromosome_13 | 1259555 | 1262462 |        |
| CUST_9785_PI425379931  | Au9.Cre11.g470000 | reverse transcriptase                                                                                                                                                                                                                               | 0.702 | 3.47E-02 | chromosome_11 | 437245  | 449044  |        |
| CUST_6760_PI425379931  | Au9.Cre03.g172100 | peptide deformylase                                                                                                                                                                                                                                 | 0.702 | 4.22E-03 | chromosome_3  | 3044966 | 3046887 | K00604 |
| CUST_3214_PI425379931  | Au9.Cre02.g130800 | low-co2-inducible protein                                                                                                                                                                                                                           | 0.702 | 2.29E-02 | chromosome_2  | 7356813 | 7362008 |        |
| CUST_9815_PI425379931  | Au9.Cre17.g733700 | predicted protein                                                                                                                                                                                                                                   | 0.701 | 4.26E-02 | chromosome_17 | 4829639 | 4832304 |        |
| CUST_3971_PI425379931  | Au9.Cre12.g521400 | cobyric acid -diamide synthase                                                                                                                                                                                                                      | 0.701 | 1.13E-02 | chromosome_12 | 4315110 | 4320542 | K02224 |
| CUST_6396_PI425379931  | Au9.Cre07.g341600 | GrpE nucleotide release factor; GrpE<br>nucleotide release factor;GrpE<br>nucleotide release factor; GrpE<br>nucleotide release factor;GrpE<br>nucleotide release factor; GrpE<br>nucleotide release factor;GrpE<br>nucleotide release factor; GrpE | 0.701 | 2.83E-02 | chromosome_7  | 3970964 | 3974783 |        |

nucleotide release factor;GrpE

|                        |                   |                                                          |       |          |               |         |         |        |
|------------------------|-------------------|----------------------------------------------------------|-------|----------|---------------|---------|---------|--------|
| CUST_13335_PI425379931 | Au9.Cre12.g531700 | amp deaminase                                            | 0.7   | 2.27E-02 | chromosome_12 | 5431476 | 5439056 | K01490 |
| CUST_2314_PI425379931  | Au9.Cre11.g472050 | Ubiquinone/menaquinone<br>biosynthesis methyltransferase | 0.7   | 4.86E-02 | chromosome_11 | 830818  | 836570  |        |
| CUST_9919_PI425379931  | Au9.Cre08.g384950 | hydroxymethylpyrimidine kinase<br>(ISS)                  | 0.7   | 2.91E-02 | chromosome_8  | 4004056 | 4006481 | K14153 |
| CUST_13652_PI425379931 | Au9.Cre16.g689000 | hypothetical protein<br>CHLREDRAFT_193656                | 0.699 | 4.26E-02 | chromosome_16 | 5614363 | 5617818 |        |
| CUST_4910_PI425379931  | Au9.Cre12.g542150 | integral membrane protein                                | 0.699 | 1.76E-02 | chromosome_12 | 6944602 | 6946448 |        |
| CUST_3962_PI425379931  | Au9.Cre08.g364200 | predicted protein                                        | 0.699 | 3.89E-02 | chromosome_8  | 991177  | 992002  |        |
| CUST_14583_PI425379931 | Au9.Cre07.g340200 | pgr5-like a                                              | 0.699 | 1.65E-02 | chromosome_7  | 3766935 | 3769431 |        |
| CUST_1797_PI425379931  | Au9.Cre13.g580050 | AAA+-type ATPase                                         | 0.698 | 3.89E-02 | chromosome_13 | 2492250 | 2499917 | K01509 |
| CUST_2271_PI425379931  | Au9.Cre07.g339050 | actin-depolymerizing factor 3                            | 0.698 | 1.58E-02 | chromosome_7  | 3617293 | 3621336 | K05765 |
| CUST_906_PI425379931   | Au9.Cre03.g178450 | Chaperonin 10                                            | 0.698 | 1.73E-02 | chromosome_3  | 3800951 | 3802359 |        |
| CUST_7803_PI425379931  | Au9.Cre02.g128300 | Histone-lysine N-methyltransferase                       | 0.698 | 6.32E-03 | chromosome_2  | 7035925 | 7046116 |        |

|                        |                   |                                                                                    |       |          |               |         |         |        |
|------------------------|-------------------|------------------------------------------------------------------------------------|-------|----------|---------------|---------|---------|--------|
| CUST_12947_PI425379931 | Au9.Cre12.g507700 | KEKE-like motif-containing<br>transcription regulator<br>(Rlr1)/suppressor of sin4 | 0.697 | 1.13E-02 | chromosome_12 | 2740619 | 2755917 |        |
| CUST_11285_PI425379931 | Au9.Cre37.g784800 | pol-like protein                                                                   | 0.696 | 3.54E-02 | scaffold_37   | 18096   | 23691   |        |
| CUST_13847_PI425379931 | Au9.Cre13.g574000 | chloride channel                                                                   | 0.696 | 7.88E-03 | chromosome_13 | 1648194 | 1662652 | K05011 |
| CUST_9869_PI425379931  | Au9.Cre01.g020300 | Succinate dehydrogenase subunit D                                                  | 0.696 | 2.18E-02 | chromosome_1  | 3050519 | 3057897 | K00237 |
| CUST_14132_PI425379931 | Au9.Cre03.g154850 | ubiquinone biosynthesis protein                                                    | 0.695 | 3.89E-02 | chromosome_3  | 907158  | 910313  |        |
| CUST_4849_PI425379931  | Au9.Cre16.g666600 | reverse transcriptase                                                              | 0.694 | 2.88E-02 | chromosome_16 | 2441553 | 2451701 |        |
| CUST_171_PI425379931   | Au9.Cre03.g189050 | glycoprotein endo-alpha- -<br>mannosidase-like protein                             | 0.694 | 2.69E-02 | chromosome_3  | 4796207 | 4801178 |        |
| CUST_9217_PI425379931  | Au9.Cre02.g083700 | signal transducer for phototaxis                                                   | 0.694 | 3.41E-02 | chromosome_2  | 1315913 | 1322258 |        |
| CUST_4133_PI425379931  | Au9.Cre12.g516450 | gamma carbonic anhydrase                                                           | 0.693 | 0.00E+00 | chromosome_12 | 3817752 | 3819397 | K00680 |
| CUST_9448_PI425379931  | Au9.Cre07.g327400 | NADH:ubiquinone oxidoreductase<br>ND9 subunit                                      | 0.693 | 1.22E-02 | chromosome_7  | 1928668 | 1930467 | K03936 |
| CUST_13598_PI425379931 | Au9.Cre01.g065150 | Histidinol phosphate<br>aminotransferase                                           | 0.693 | 1.85E-02 | chromosome_1  | 8935581 | 8940040 |        |
| CUST_3034_PI425379931  | Au9.Cre16.g692900 | hypothetical protein<br>CHLREDRAFT_178046                                          | 0.692 | 1.65E-02 | chromosome_16 | 6118210 | 6121675 |        |
| CUST_8669_PI425379931  | Au9.Cre13.g563150 | hypothetical protein                                                               | 0.692 | 2.45E-02 | chromosome_13 | 166407  | 170827  |        |



CHLREDRAFT\_143294

|                        |                   |                                                            |       |          |               |         |         |        |
|------------------------|-------------------|------------------------------------------------------------|-------|----------|---------------|---------|---------|--------|
| CUST_12626_P1425379931 | Au9.Cre06.g259400 | S-adenosyl-L-methionine-dependent methyltransferase        | 0.692 | 1.37E-02 | chromosome_6  | 1443773 | 1447672 |        |
| CUST_5584_P1425379931  | Au9.Cre07.g333200 | pol-like protein                                           | 0.691 | 3.19E-02 | chromosome_7  | 2730432 | 2733925 |        |
| CUST_7479_P1425379931  | Au9.Cre06.g289150 | CDF transporter, membrane protein                          | 0.691 | 1.85E-02 | chromosome_6  | 4668642 | 4675497 |        |
| CUST_2112_P1425379931  | Au9.Cre01.g060600 | alpha beta hydrolase fold protein                          | 0.691 | 3.41E-02 | chromosome_1  | 8401837 | 8405084 |        |
| CUST_5171_P1425379931  | Au9.Cre16.g675800 | hypothetical protein                                       | 0.69  | 2.83E-02 | chromosome_16 | 3926970 | 3929088 |        |
| CHLREDRAFT_149171      |                   |                                                            |       |          |               |         |         |        |
| CUST_7457_P1425379931  | Au9.Cre02.g093050 | heat shock protein 70D                                     | 0.69  | 2.88E-02 | chromosome_2  | 2483396 | 2484793 |        |
| CUST_12485_P1425379931 | Au9.Cre10.g452000 | cation transport protein chac-related                      | 0.689 | 4.83E-02 | chromosome_10 | 4488874 | 4491021 |        |
| CUST_6956_P1425379931  | Au9.Cre06.g290850 | predicted protein                                          | 0.689 | 2.23E-02 | chromosome_6  | 4913384 | 4916103 |        |
| CUST_12165_P1425379931 | Au9.Cre12.g560350 | NimA-related protein kinase 2                              | 0.688 | 3.25E-02 | chromosome_12 | 9160194 | 9166337 | K06228 |
| CUST_2310_P1425379931  | Au9.Cre07.g357550 | predicted protein                                          | 0.688 | 1.85E-02 | chromosome_7  | 6117546 | 6125185 |        |
| CUST_14484_P1425379931 | Au9.Cre10.g446100 | Thioredoxin y                                              | 0.687 | 1.22E-02 | chromosome_10 | 3678225 | 3680227 | K13989 |
| CUST_9305_P1425379931  | Au9.Cre07.g325100 | ae007549_12 uncharacterized conserved membrane sana family | 0.687 | 3.93E-02 | chromosome_7  | 1642153 | 1644528 |        |
| CUST_12279_P1425379931 | Au9.Cre03.g181050 | predicted protein                                          | 0.687 | 1.85E-02 | chromosome_3  | 4050787 | 4056606 |        |

|                        |                   |                                                                                                                                                                                                                        |       |          |               |         |         |        |
|------------------------|-------------------|------------------------------------------------------------------------------------------------------------------------------------------------------------------------------------------------------------------------|-------|----------|---------------|---------|---------|--------|
| CUST_5611_PI425379931  | Au9.Cre03.g177300 | haloperoxidase-like protein                                                                                                                                                                                            | 0.686 | 2.53E-02 | chromosome_3  | 3640827 | 3643908 |        |
| CUST_2386_PI425379931  | Au9.Cre51.g790250 | pol-like protein                                                                                                                                                                                                       | 0.685 | 2.11E-02 | scaffold_51   | 41536   | 45718   |        |
| CUST_1332_PI425379931  | Au9.Cre22.g763250 | Phosphoglycerate Kinase;<br>phosphoglycerate kinase,<br>chloroplast precursor,<br>phosphoglycerate<br>kinase;Phosphoglycerate Kinase;<br>phosphoglycerate kinase,<br>chloroplast precursor,<br>phosphoglycerate kinase | 0.685 | 2.66E-02 | scaffold_22   | 125396  | 129780  |        |
| CUST_442_PI425379931   | Au9.Cre02.g080250 | fanciful k+ uptake-b family<br>transporter                                                                                                                                                                             | 0.685 | 2.24E-02 | chromosome_2  | 931195  | 934607  |        |
| CUST_8583_PI425379931  | Au9.Cre15.g641900 | phosphatidylethanolamine n-<br>methyltransferase                                                                                                                                                                       | 0.684 | 9.80E-03 | chromosome_15 | 1456608 | 1461756 | K00570 |
| CUST_7268_PI425379931  | Au9.Cre07.g328400 | rna binding protein                                                                                                                                                                                                    | 0.684 | 3.89E-02 | chromosome_7  | 2054539 | 2058114 | K14651 |
| CUST_6839_PI425379931  | Au9.Cre01.g027050 | predicted protein                                                                                                                                                                                                      | 0.684 | 4.98E-02 | chromosome_1  | 3947465 | 3949158 |        |
| CUST_10383_PI425379931 | Au9.Cre10.g455400 | RNA methylase                                                                                                                                                                                                          | 0.683 | 2.83E-02 | chromosome_10 | 5001407 | 5004407 |        |
| CUST_5851_PI425379931  | Au9.Cre09.g399550 | rglg2 (ring domain ligase2) ubiquitin-<br>protein ligase                                                                                                                                                               | 0.683 | 3.89E-02 | chromosome_9  | 2069794 | 2075768 | K09561 |

|                        |                   |                                                        |       |          |               |         |         |        |
|------------------------|-------------------|--------------------------------------------------------|-------|----------|---------------|---------|---------|--------|
| CUST_2414_P1425379931  | Au9.Cre06.g283800 | predicted protein                                      | 0.683 | 1.85E-02 | chromosome_6  | 4050712 | 4056998 |        |
| CUST_7609_P1425379931  | Au9.Cre03.g206600 | Acetohydroxyacid dehydratase                           | 0.683 | 4.26E-02 | chromosome_3  | 6915031 | 6922211 | K01687 |
| CUST_13709_P1425379931 | Au9.Cre12.g554800 | Phosphoribulokinase                                    | 0.682 | 2.72E-02 | chromosome_12 | 8449153 | 8452598 | K00855 |
| CUST_1149_P1425379931  | Au9.Cre07.g353950 | xp-g/rad2 dna repair endonuclease<br>family            | 0.682 | 4.59E-02 | chromosome_7  | 5639642 | 5647547 | K10746 |
| CUST_12329_P1425379931 | Au9.Cre06.g304500 | zygote-specific protein                                | 0.682 | 2.66E-02 | chromosome_6  | 6770935 | 6774688 |        |
| CUST_6182_P1425379931  | Au9.Cre16.g672350 | brca1 associated ring                                  | 0.681 | 1.85E-02 | chromosome_16 | 3419781 | 3426366 |        |
| CUST_13242_P1425379931 | Au9.Cre01.g019300 |                                                        | 0.68  | 2.88E-02 | chromosome_1  | 2909903 | 2925888 | K01768 |
| CUST_5549_P1425379931  | Au9.Cre06.g286250 | mitochondrial substrate carrier<br>protein             | 0.679 | 3.47E-02 | chromosome_6  | 4326203 | 4329799 | K13577 |
| CUST_14224_P1425379931 | Au9.Cre02.g079200 | CCAAT-binding transcription factor<br>subunit A        | 0.679 | 6.78E-03 | chromosome_2  | 815470  | 817843  | K08065 |
| CUST_3617_P1425379931  | Au9.Cre39.g785800 | endonuclease-reverse transcriptase                     | 0.678 | 4.98E-02 | scaffold_39   | 959     | 5745    |        |
| CUST_4955_P1425379931  | Au9.Cre12.g541850 | acylphosphatase organ-common<br>type isozyme variant 1 | 0.678 | 9.66E-03 | chromosome_12 | 6915595 | 6917472 | K01512 |
| CUST_3928_P1425379931  | Au9.Cre12.g501550 | hypothetical protein<br>CHLREDRAFT_182999              | 0.678 | 9.66E-03 | chromosome_12 | 2131301 | 2132702 |        |
| CUST_2162_P1425379931  | Au9.Cre03.g172750 | hypothetical protein<br>CHLREDRAFT_143922              | 0.678 | 3.25E-02 | chromosome_3  | 3107857 | 3109605 |        |

|                        |                   |                                         |       |          |               |         |         |        |
|------------------------|-------------------|-----------------------------------------|-------|----------|---------------|---------|---------|--------|
| CUST_10187_PI425379931 | Au9.Cre16.g670950 | chloroplast cytochrome c                | 0.677 | 6.32E-03 | chromosome_16 | 3229466 | 3231441 | K08906 |
| CUST_2393_PI425379931  | Au9.Cre16.g666750 | pol-like protein                        | 0.677 | 3.93E-02 | chromosome_16 | 2540897 | 2544851 |        |
| CUST_6061_PI425379931  | Au9.Cre10.g450150 | predicted protein                       | 0.677 | 2.66E-02 | chromosome_10 | 4215166 | 4218541 |        |
| CUST_12595_PI425379931 | Au9.Cre02.g101550 | Mg2+ transporter protein, CorA-like     | 0.677 | 1.65E-02 | chromosome_2  | 3772680 | 3775745 |        |
| CUST_4693_PI425379931  | Au9.Cre02.g094250 | mitochondrial carrier protein related   | 0.677 | 2.53E-02 | chromosome_2  | 2668656 | 2671988 | K13354 |
| CUST_3115_PI425379931  | Au9.Cre01.g042950 | salt tolerant protein                   | 0.677 | 2.66E-02 | chromosome_1  | 5906616 | 5909691 |        |
| CUST_12600_PI425379931 | Au9.Cre51.g790300 | reverse transcriptases                  | 0.676 | 1.91E-02 | scaffold_51   | 49550   | 56515   |        |
| CUST_6682_PI425379931  | Au9.Cre21.g761450 | endonuclease-reverse transcriptase      | 0.676 | 4.59E-02 | scaffold_21   | 231135  | 233256  |        |
| CUST_12701_PI425379931 | Au9.Cre01.g049600 | F0-ATPase complex, subunit I            | 0.676 | 4.41E-02 | chromosome_1  | 6774421 | 6776974 |        |
| CUST_6173_PI425379931  | Au9.Cre24.g768650 | predicted protein                       | 0.675 | 2.66E-02 | scaffold_24   | 9640    | 12745   |        |
| CUST_4616_PI425379931  | Au9.Cre07.g326900 | hypothetical protein                    | 0.675 | 1.65E-02 | chromosome_7  | 1866923 | 1869667 |        |
|                        |                   | CHLREDRAFT_188528                       |       |          |               |         |         |        |
| CUST_3528_PI425379931  | Au9.Cre06.g303150 | Putative tyrosine kinase                | 0.675 | 4.75E-03 | chromosome_6  | 6575716 | 6594382 | K04422 |
| CUST_3135_PI425379931  | Au9.Cre02.g088850 | 6,7-dimethyl-8-ribityllumazine synthase | 0.675 | 2.96E-02 | chromosome_2  | 1952205 | 1953921 | K00794 |
| CUST_13854_PI425379931 | Au9.Cre07.g351700 | Predicted membrane protein              | 0.674 | 6.62E-03 | chromosome_7  | 5320879 | 5323065 |        |
| CUST_14593_PI425379931 | Au9.Cre07.g332450 | nmt1 thi5 like domain protein           | 0.674 | 2.66E-02 | chromosome_7  | 2570476 | 2573604 | K02051 |
| CUST_5976_PI425379931  | Au9.Cre01.g005550 | ARF-like GTPase                         | 0.674 | 4.75E-03 | chromosome_1  | 974404  | 975625  | K07937 |

|                        |                   |                                                               |       |          |               |         |         |        |
|------------------------|-------------------|---------------------------------------------------------------|-------|----------|---------------|---------|---------|--------|
| CUST_89_PI425379931    | Au9.Cre17.g742850 | Histone-lysine N-methyltransferase                            | 0.673 | 3.96E-03 | chromosome_17 | 6414331 | 6415896 |        |
| CUST_2817_PI425379931  | Au9.Cre06.g261000 | 10 kDa photosystem II polypeptide                             | 0.673 | 1.13E-02 | chromosome_6  | 1638321 | 1639901 | K03541 |
| CUST_12110_PI425379931 | Au9.Cre01.g021350 | predicted protein                                             | 0.673 | 2.69E-02 | chromosome_1  | 3169584 | 3172231 |        |
| CUST_13869_PI425379931 | Au9.Cre12.g554750 | ubiquitin-like protein                                        | 0.672 | 1.45E-02 | chromosome_12 | 8445435 | 8447186 | K03873 |
| CUST_7401_PI425379931  | Au9.Cre03.g196100 | predicted protein                                             | 0.671 | 3.80E-02 | chromosome_3  | 5570336 | 5573606 |        |
| CUST_5241_PI425379931  | Au9.Cre13.g585300 | monogalactosyldiacylglycerol<br>synthase                      | 0.67  | 4.86E-02 | chromosome_13 | 3174588 | 3180639 |        |
| CUST_2227_PI425379931  | Au9.Cre16.g684650 | nickel chaperone for hydrogenase or<br>urease                 | 0.669 | 1.13E-02 | chromosome_16 | 5045135 | 5049396 | K12605 |
| CUST_14435_PI425379931 | Au9.Cre12.g548550 | predicted protein                                             | 0.669 | 2.89E-02 | chromosome_12 | 7667463 | 7670894 |        |
| CUST_5778_PI425379931  | Au9.Cre04.g222450 | hypothetical protein<br>CHLREDRAFT_181482                     | 0.669 | 2.27E-02 | chromosome_4  | 1745372 | 1746510 |        |
| CUST_11638_PI425379931 | Au9.Cre01.g073100 | Serine/threonine protein<br>kinase/TGF-beta stimulated factor | 0.669 | 3.55E-02 | chromosome_1  | 9967078 | 9973204 |        |
| CUST_11001_PI425379931 | Au9.Cre12.g561650 | pol-like protein                                              | 0.668 | 5.74E-03 | chromosome_12 | 9326443 | 9328764 |        |
| CUST_12783_PI425379931 | Au9.Cre10.g452650 | mitochondrial inner membrane<br>translocase                   | 0.668 | 1.03E-02 | chromosome_10 | 4573302 | 4577656 |        |
| CUST_12993_PI425379931 | Au9.Cre01.g045550 | triose phosphate translocator                                 | 0.668 | 2.63E-02 | chromosome_1  | 6236240 | 6241092 |        |
| CUST_6047_PI425379931  | Au9.Cre12.g555100 | predicted protein                                             | 0.667 | 1.13E-02 | chromosome_12 | 8496657 | 8499702 |        |

|                        |                   |                                                          |       |          |               |         |         |        |
|------------------------|-------------------|----------------------------------------------------------|-------|----------|---------------|---------|---------|--------|
| CUST_11825_P1425379931 | Au9.Cre10.g457000 | Peptidyl-prolyl cis-trans isomerase,<br>cyclophilin-type | 0.667 | 4.34E-02 | chromosome_10 | 5221944 | 5226727 | K10598 |
| CUST_4014_P1425379931  | Au9.Cre13.g596300 | B-box zinc finger protein                                | 0.666 | 5.74E-03 | chromosome_13 | 4746141 | 4749429 |        |
| CUST_3619_P1425379931  | Au9.Cre12.g490550 | predicted protein                                        | 0.666 | 3.89E-02 | chromosome_12 | 895560  | 898003  |        |
| CUST_1716_P1425379931  | Au9.Cre17.g707700 | Manganese transport protein                              | 0.665 | 3.29E-02 | chromosome_17 | 1593560 | 1598394 | K12347 |
| CUST_1897_P1425379931  | Au9.Cre13.g601950 | hypothetical protein<br>CHLREDRAFT_180886                | 0.665 | 3.19E-02 | chromosome_13 | 5373382 | 5375817 |        |
| CUST_9953_P1425379931  | Au9.Cre01.g007600 | predicted protein                                        | 0.665 | 3.55E-02 | chromosome_1  | 1294029 | 1299289 |        |
| CUST_6397_P1425379931  | Au9.Cre09.g409500 | chloroplast nucleoid dna-binding<br>protein              | 0.664 | 1.13E-02 | chromosome_9  | 3588265 | 3592870 | K14525 |
| CUST_9477_P1425379931  | Au9.Cre05.g233550 | serine-threonine protein kinase                          | 0.663 | 1.73E-02 | chromosome_5  | 727225  | 740896  |        |
| CUST_9876_P1425379931  | Au9.Cre01.g054100 | leucine-rich repeat-containing<br>protein                | 0.663 | 3.19E-02 | chromosome_1  | 7493487 | 7499722 | K13730 |
| CUST_13104_P1425379931 | Au9.Cre01.g001750 | Chloroplast trigger factor                               | 0.663 | 2.27E-02 | chromosome_1  | 287370  | 294187  |        |
| CUST_9411_P1425379931  | Au9.Cre34.g783750 | hypothetical protein<br>CHLREDRAFT_180858                | 0.662 | 3.29E-02 | scaffold_34   | 140140  | 144315  |        |
| CUST_3203_P1425379931  | Au9.Cre13.g597850 | predicted protein                                        | 0.662 | 3.55E-02 | chromosome_13 | 4936709 | 4940714 |        |
| CUST_170_P1425379931   | Au9.Cre07.g313850 | wd40 repeat protein                                      | 0.662 | 2.91E-02 | chromosome_7  | 243532  | 255526  | K03362 |
| CUST_5044_P1425379931  | Au9.Cre03.g159350 | wd40 repeat protein                                      | 0.662 | 3.89E-02 | chromosome_3  | 1475434 | 1487911 | K03130 |

|                        |                   |                                                                                                                                                                                |       |          |               |         |         |        |
|------------------------|-------------------|--------------------------------------------------------------------------------------------------------------------------------------------------------------------------------|-------|----------|---------------|---------|---------|--------|
| CUST_3078_PI425379931  | Au9.Cre17.g708300 | 26S proteasome regulatory subunit                                                                                                                                              | 0.661 | 0.00E+00 | chromosome_17 | 1661387 | 1664132 | K03031 |
| CUST_12537_PI425379931 | Au9.Cre16.g667500 | voltage-activated ion                                                                                                                                                          | 0.661 | 4.75E-03 | chromosome_16 | 2680100 | 2686091 |        |
| CUST_5624_PI425379931  | Au9.Cre06.g300700 | nad-dependent epimerase<br>dehydratase                                                                                                                                         | 0.661 | 3.55E-02 | chromosome_6  | 6242459 | 6245142 |        |
| CUST_12158_PI425379931 | Au9.Cre12.g547550 | predicted protein                                                                                                                                                              | 0.66  | 1.73E-02 | chromosome_12 | 7539705 | 7545656 |        |
| CUST_9751_PI425379931  | Au9.Cre12.g498950 | hypothetical protein<br>CHLREDRAFT_194644                                                                                                                                      | 0.66  | 0.00E+00 | chromosome_12 | 1872859 | 1875671 |        |
| CUST_11818_PI425379931 | Au9.Cre12.g486500 | iron ion binding acting on paired<br>with incorporation or reduction of<br>molecular 2-oxoglutarate as one and<br>incorporation of one atom each of<br>oxygen into both donors | 0.659 | 4.05E-02 | chromosome_12 | 411119  | 414793  |        |
| CUST_13713_PI425379931 | Au9.Cre11.g475850 | DnaJ-like Zinc-finger protein                                                                                                                                                  | 0.659 | 2.45E-02 | chromosome_11 | 1439454 | 1441843 | K12603 |
| CUST_10775_PI425379931 | Au9.Cre01.g006650 | pol-like protein                                                                                                                                                               | 0.659 | 5.74E-03 | chromosome_1  | 1133293 | 1136934 |        |
| CUST_13837_PI425379931 | Au9.Cre07.g321600 | hypothetical protein<br>CHLREDRAFT_142802                                                                                                                                      | 0.657 | 3.89E-02 | chromosome_7  | 1241750 | 1243825 |        |
| CUST_6209_PI425379931  | Au9.Cre02.g112950 | hypothetical protein<br>CHLREDRAFT_166632                                                                                                                                      | 0.656 | 1.04E-02 | chromosome_2  | 5179387 | 5181710 |        |
| CUST_483_PI425379931   | Au9.Cre19.g752000 | dead box protein                                                                                                                                                               | 0.655 | 1.13E-02 | scaffold_19   | 52786   | 60047   |        |

|                        |                   |                                                   |       |          |               |         |         |        |
|------------------------|-------------------|---------------------------------------------------|-------|----------|---------------|---------|---------|--------|
| CUST_11804_PI425379931 | Au9.Cre17.g741850 | Heterogeneous Nuclear<br>Ribonucleoprotein        | 0.655 | 1.13E-02 | chromosome_17 | 6265730 | 6267802 |        |
| CUST_2530_PI425379931  | Au9.Cre10.g419050 | mitochondrial F1F0 ATP synthase,<br>alpha subunit | 0.655 | 7.40E-03 | chromosome_10 | 193560  | 200139  | K02111 |
| CUST_4421_PI425379931  | Au9.Cre06.g278200 | rhythm of chloroplast 66                          | 0.655 | 3.66E-02 | chromosome_6  | 3477479 | 3487350 | K12130 |
| CUST_10285_PI425379931 | Au9.Cre01.g037200 | predicted protein                                 | 0.655 | 5.18E-03 | chromosome_1  | 5150074 | 5151312 |        |
| CUST_5857_PI425379931  | Au9.Cre01.g020750 | predicted protein                                 | 0.655 | 2.43E-02 | chromosome_1  | 3085376 | 3088537 | K03348 |
| CUST_11753_PI425379931 | Au9.Cre10.g446200 | hypothetical protein<br>CHLREDRAFT_187586         | 0.654 | 4.26E-02 | chromosome_10 | 3683451 | 3685577 |        |
| CUST_10998_PI425379931 | Au9.Cre09.g416300 | hypothetical protein<br>CHLREDRAFT_192178         | 0.654 | 1.12E-02 | chromosome_9  | 4549299 | 4555938 |        |
| CUST_1298_PI425379931  | Au9.Cre01.g016450 | mynd finger family expressed                      | 0.654 | 9.80E-03 | chromosome_1  | 2580455 | 2587140 |        |
| CUST_3471_PI425379931  | Au9.Cre10.g421250 | Component of the Exocyst Complex                  | 0.653 | 4.98E-02 | chromosome_10 | 526909  | 534500  | K07195 |
| CUST_8508_PI425379931  | Au9.Cre09.g414050 | rvb1-like protein                                 | 0.653 | 1.28E-02 | chromosome_9  | 4303296 | 4307588 | K04499 |
| CUST_3924_PI425379931  | Au9.Cre19.g751650 | Dihydroorotase dehydrogenase                      | 0.652 | 0.00E+00 | scaffold_19   | 21650   | 25585   |        |
| CUST_12039_PI425379931 | Au9.Cre06.g259450 | predicted protein                                 | 0.651 | 2.89E-02 | chromosome_6  | 1447961 | 1450346 |        |
| CUST_2215_PI425379931  | Au9.Cre01.g014000 | predicted protein                                 | 0.651 | 1.96E-02 | chromosome_1  | 2291239 | 2293242 |        |
| CUST_12928_PI425379931 | Au9.Cre12.g555550 | gelsolin precursor                                | 0.65  | 3.19E-02 | chromosome_12 | 8526887 | 8536052 | K05768 |



|                        |                   |                                              |       |          |               |         |         |        |
|------------------------|-------------------|----------------------------------------------|-------|----------|---------------|---------|---------|--------|
| CUST_9612_P1425379931  | Au9.Cre10.g444550 | signal peptide peptidase                     | 0.649 | 0.00E+00 | chromosome_10 | 3378948 | 3385970 | K03313 |
| CUST_11498_P1425379931 | Au9.Cre10.g435800 | chloroplast stem-loop-binding protein        | 0.649 | 2.66E-02 | chromosome_10 | 2402951 | 2409343 | K01784 |
| CUST_4068_P1425379931  | Au9.Cre10.g445150 | polymyositis/scleroderma autoantigen-related | 0.648 | 1.22E-02 | chromosome_10 | 3466428 | 3472194 |        |
| CUST_10815_P1425379931 | Au9.Cre06.g293150 | putative phosphomutase                       | 0.648 | 3.29E-02 | chromosome_6  | 5229916 | 5234068 |        |
| CUST_6058_P1425379931  | Au9.Cre02.g093650 | rieske (2fe-2s) domain protein               | 0.648 | 2.66E-02 | chromosome_2  | 2599455 | 2601108 |        |
| CUST_7308_P1425379931  | Au9.Cre01.g049700 | kinesin-like protein                         | 0.648 | 2.29E-02 | chromosome_1  | 6785682 | 6788786 |        |
| CUST_1198_P1425379931  | Au9.Cre17.g720400 | heavy metal transporting ATPase              | 0.647 | 2.66E-02 | chromosome_17 | 3013946 | 3020397 | K01547 |
| CUST_8149_P1425379931  | Au9.Cre10.g419500 | predicted protein                            | 0.647 | 3.19E-02 | chromosome_10 | 262111  | 266496  |        |
| CUST_7244_P1425379931  | Au9.Cre07.g325050 | exostosin-like glycosyltransferase           | 0.647 | 3.41E-02 | chromosome_7  | 1634429 | 1642134 | K02367 |
| CUST_6421_P1425379931  | Au9.Cre17.g700100 | macrophage migration inhibitory factor       | 0.646 | 6.62E-03 | chromosome_17 | 606842  | 608673  | K07253 |
| CUST_5050_P1425379931  | Au9.Cre16.g682800 | rna-binding protein                          | 0.646 | 1.45E-02 | chromosome_16 | 4853720 | 4857263 |        |
| CUST_12870_P1425379931 | Au9.Cre07.g331500 | Inactive subunit of chloroplast ClpP complex | 0.646 | 2.29E-02 | chromosome_7  | 2466271 | 2473689 |        |
| CUST_12756_P1425379931 | Au9.Cre02.g076300 | Uroporphyrinogen decarboxylase               | 0.646 | 4.00E-03 | chromosome_2  | 442913  | 445864  | K01599 |
| CUST_10631_P1425379931 | Au9.Cre17.g722000 | Solute carrier protein                       | 0.645 | 2.66E-02 | chromosome_17 | 3203234 | 3207342 |        |

|                        |                   |                                                                |       |          |               |         |         |        |
|------------------------|-------------------|----------------------------------------------------------------|-------|----------|---------------|---------|---------|--------|
| CUST_9522_P1425379931  | Au9.Cre12.g544150 | Peptidyl-prolyl cis-trans isomerase,<br>cyclophilin-type       | 0.645 | 3.29E-02 | chromosome_12 | 7157729 | 7160337 | K05864 |
| CUST_6987_P1425379931  | Au9.Cre07.g317200 | hypothetical protein<br>CHLREDRAFT_187479                      | 0.645 | 2.06E-02 | chromosome_7  | 679465  | 684180  |        |
| CUST_10436_P1425379931 | Au9.Cre12.g517250 | hypothetical protein<br>CHLREDRAFT_176330                      | 0.644 | 3.66E-02 | chromosome_12 | 3894874 | 3897546 |        |
| CUST_6062_P1425379931  | Au9.Cre12.g507000 |                                                                | 0.644 | 3.89E-02 | chromosome_12 | 2634496 | 2655408 |        |
| CUST_9951_P1425379931  | Au9.Cre12.g545650 | predicted protein                                              | 0.643 | 4.34E-02 | chromosome_12 | 7325002 | 7329827 |        |
| CUST_12457_P1425379931 | Au9.Cre06.g252100 | 294687m protein                                                | 0.642 | 1.73E-02 | chromosome_6  | 403014  | 413049  | K00507 |
| CUST_9653_P1425379931  | Au9.Cre14.g631850 | orphan 2                                                       | 0.641 | 6.59E-03 | chromosome_14 | 3608424 | 3611325 | K13248 |
| CUST_14609_P1425379931 | Au9.Cre02.g114600 | 2-cys peroxiredoxin                                            | 0.641 | 3.55E-02 | chromosome_2  | 5383656 | 5385624 | K13279 |
| CUST_3761_P1425379931  | Au9.Cre16.g696000 | utp--glucose-1-phosphate<br>uridylyltransferase family protein | 0.64  | 1.85E-02 | chromosome_16 | 6579093 | 6587813 | K00972 |
| CUST_7984_P1425379931  | Au9.Cre01.g028350 | DegP-type protease                                             | 0.64  | 4.59E-02 | chromosome_1  | 4063835 | 4069052 | K08372 |
| CUST_14345_P1425379931 | Au9.Cre12.g555250 | NADH:ubiquinone oxidoreductase<br>B14 subunit                  | 0.639 | 0.00E+00 | chromosome_12 | 8510946 | 8512919 | K03950 |
| CUST_10607_P1425379931 | Au9.Cre10.g421500 | predicted protein                                              | 0.639 | 0.00E+00 | chromosome_10 | 561116  | 564667  |        |
| CUST_960_P1425379931   | Au9.Cre03.g189350 | hypothetical protein<br>CHLREDRAFT_156911                      | 0.639 | 1.13E-02 | chromosome_3  | 4829076 | 4831275 |        |

|                        |                   |                                                   |       |          |               |         |         |        |
|------------------------|-------------------|---------------------------------------------------|-------|----------|---------------|---------|---------|--------|
| CUST_13174_PI425379931 | Au9.Cre16.g659900 | hypothetical protein<br>CHLREDRAFT_193064         | 0.638 | 4.98E-02 | chromosome_16 | 1560533 | 1563585 |        |
| CUST_6011_PI425379931  | Au9.Cre10.g419250 | predicted protein                                 | 0.638 | 2.66E-02 | chromosome_10 | 229119  | 231178  |        |
| CUST_12243_PI425379931 | Au9.Cre07.g312300 | antibiotic biosynthesis<br>monooxygenase          | 0.638 | 0.00E+00 | chromosome_7  | 43680   | 45391   |        |
| CUST_14070_PI425379931 | Au9.Cre13.g581150 | gcn5-related n-acetyltransferase                  | 0.636 | 9.73E-03 | chromosome_13 | 2614265 | 2617585 |        |
| CUST_10733_PI425379931 | Au9.Cre12.g540100 | predicted protein                                 | 0.636 | 1.91E-02 | chromosome_12 | 6717558 | 6721029 |        |
| CUST_3106_PI425379931  | Au9.Cre10.g457700 | calcium calmodulin-dependent<br>protein kinase id | 0.636 | 0.00E+00 | chromosome_10 | 5310500 | 5314354 | K05869 |
| CUST_2659_PI425379931  | Au9.Cre10.g419000 | myeloid leukemia factor                           | 0.636 | 1.71E-02 | chromosome_10 | 188700  | 192238  |        |
| CUST_13875_PI425379931 | Au9.Cre06.g261650 | prefoldin chaperone 1                             | 0.636 | 1.13E-02 | chromosome_6  | 1706427 | 1707875 |        |
| CUST_7705_PI425379931  | Au9.Cre05.g248000 | hypothetical protein<br>CHLREDRAFT_167685         | 0.635 | 1.00E-02 | chromosome_5  | 3261831 | 3268567 |        |
| CUST_6015_PI425379931  | Au9.Cre02.g097900 | aspartate aminotransferase                        | 0.634 | 4.00E-03 | chromosome_2  | 3221301 | 3227506 | K00813 |
| CUST_892_PI425379931   | Au9.Cre12.g546150 | cytochrome b6f complex PetM<br>subunit            | 0.633 | 1.59E-02 | chromosome_12 | 7387491 | 7388347 |        |
| CUST_7490_PI425379931  | Au9.Cre06.g300800 | Plastid ribosomal protein L27                     | 0.633 | 1.46E-02 | chromosome_6  | 6257309 | 6259059 | K02899 |
| CUST_2479_PI425379931  | Au9.Cre02.g099250 | predicted protein                                 | 0.632 | 2.18E-02 | chromosome_2  | 3436676 | 3437867 |        |
| CUST_4161_PI425379931  | Au9.Cre20.g757850 | predicted protein                                 | 0.631 | 3.25E-02 | scaffold_20   | 53126   | 56026   |        |

|                        |                   |                                                                                                                                                                                                                                                                          |       |          |               |         |         |        |
|------------------------|-------------------|--------------------------------------------------------------------------------------------------------------------------------------------------------------------------------------------------------------------------------------------------------------------------|-------|----------|---------------|---------|---------|--------|
| CUST_7718_P1425379931  | Au9.Cre19.g752300 | heparan sulfate sulfotransferase                                                                                                                                                                                                                                         | 0.631 | 4.00E-03 | scaffold_19   | 93695   | 96075   |        |
| CUST_12780_P1425379931 | Au9.Cre06.g248800 | protein kinase                                                                                                                                                                                                                                                           | 0.631 | 2.18E-02 | chromosome_6  | 23321   | 25731   |        |
| CUST_4095_P1425379931  | Au9.Cre01.g031100 | predicted protein                                                                                                                                                                                                                                                        | 0.631 | 1.13E-02 | chromosome_1  | 4393118 | 4396913 |        |
| CUST_13130_P1425379931 | Au9.Cre17.g724700 | Pheophorbide a oxygenase; Rieske<br>iron-sulfur cluster<br>protein;Pheophorbide a oxygenase;<br>Rieske iron-sulfur cluster<br>protein;Pheophorbide a oxygenase;<br>Rieske iron-sulfur cluster<br>protein;Pheophorbide a oxygenase;<br>Rieske iron-sulfur cluster protein | 0.63  | 1.91E-02 | chromosome_17 | 3463081 | 3467504 | K13071 |
| CUST_6661_P1425379931  | Au9.Cre10.g450900 | predicted protein                                                                                                                                                                                                                                                        | 0.63  | 2.83E-02 | chromosome_10 | 4296802 | 4300643 |        |
| CUST_1417_P1425379931  | Au9.Cre06.g294000 | dienelactone hydrolase                                                                                                                                                                                                                                                   | 0.63  | 7.40E-03 | chromosome_6  | 5337284 | 5340609 | K01061 |
| CUST_11509_P1425379931 | Au9.Cre12.g499950 | serine esterase family protein                                                                                                                                                                                                                                           | 0.629 | 1.58E-02 | chromosome_12 | 1962516 | 1966517 |        |
| CUST_6528_P1425379931  | Au9.Cre05.g234750 | predicted protein                                                                                                                                                                                                                                                        | 0.629 | 1.25E-02 | chromosome_5  | 943336  | 945240  |        |
| CUST_7139_P1425379931  | Au9.Cre01.g055550 | cytochrome c oxidase assembly<br>protein                                                                                                                                                                                                                                 | 0.629 | 2.24E-02 | chromosome_1  | 7662030 | 7665589 | K02258 |
| CUST_7840_P1425379931  | Au9.Cre13.g584000 | predicted protein                                                                                                                                                                                                                                                        | 0.628 | 1.56E-02 | chromosome_13 | 2971917 | 2976299 |        |
| CUST_4540_P1425379931  | Au9.Cre08.g372450 | Oxygen evolving enhancer protein 3                                                                                                                                                                                                                                       | 0.628 | 1.08E-02 | chromosome_8  | 2108627 | 2110421 |        |

|                        |                   |                                                        |       |          |               |         |         |        |
|------------------------|-------------------|--------------------------------------------------------|-------|----------|---------------|---------|---------|--------|
| CUST_6905_PI425379931  | Au9.Cre06.g309600 | hypothetical protein<br>CHLREDRAFT_188815              | 0.627 | 1.28E-02 | chromosome_6  | 7345890 | 7350208 |        |
| CUST_4495_PI425379931  | Au9.Cre03.g189700 | hypothetical protein<br>CHLREDRAFT_183306              | 0.627 | 2.43E-02 | chromosome_3  | 4867407 | 4870449 |        |
| CUST_6981_PI425379931  | Au9.Cre02.g113100 | brain protein 44-like protein                          | 0.627 | 5.99E-03 | chromosome_2  | 5188566 | 5190699 | K11086 |
| CUST_12593_PI425379931 | Au9.Cre12.g551050 | predicted protein                                      | 0.626 | 3.41E-02 | chromosome_12 | 7922735 | 7927293 |        |
| CUST_7309_PI425379931  | Au9.Cre04.g218700 | Putative organellar translation<br>initiation factor   | 0.626 | 0.00E+00 | chromosome_4  | 1180492 | 1181871 |        |
| CUST_123_PI425379931   | Au9.Cre29.g777950 | S-adenosyl-L-methionine-dependent<br>methyltransferase | 0.625 | 1.91E-02 | scaffold_29   | 58631   | 61159   |        |
| CUST_61_PI425379931    | Au9.Cre14.g611200 | mitochondrial transcription<br>termination mterf       | 0.625 | 0.00E+00 | chromosome_14 | 467631  | 470414  |        |
| CUST_8286_PI425379931  | Au9.Cre13.g591300 |                                                        | 0.625 | 2.89E-02 | chromosome_13 | 4167987 | 4194696 |        |
| CUST_1692_PI425379931  | Au9.Cre12.g512700 | Transcription initiation factor IIE,<br>beta subunit   | 0.625 | 1.13E-02 | chromosome_12 | 3324899 | 3327753 | K03137 |
| CUST_14471_PI425379931 | Au9.Cre17.g718450 | Matrix metalloproteinase                               | 0.624 | 1.59E-02 | chromosome_17 | 2753556 | 2761859 |        |
| CUST_6615_PI425379931  | Au9.Cre13.g602650 | predicted protein                                      | 0.624 | 7.97E-03 | chromosome_13 | 5731690 | 5735248 |        |
| CUST_2683_PI425379931  | Au9.Cre13.g592950 | j1a crystallin                                         | 0.624 | 2.45E-02 | chromosome_13 | 4389855 | 4397772 |        |
| CUST_9399_PI425379931  | Au9.Cre13.g562750 | predicted protein                                      | 0.624 | 3.55E-02 | chromosome_13 | 127371  | 132985  |        |

|                        |                   |                                                  |       |          |               |         |         |        |
|------------------------|-------------------|--------------------------------------------------|-------|----------|---------------|---------|---------|--------|
| CUST_1136_PI425379931  | Au9.Cre08.g384850 | short-chain dehydrogenase<br>reductase sdr       | 0.624 | 0.00E+00 | chromosome_8  | 3984116 | 3999401 |        |
| CUST_11116_PI425379931 | Au9.Cre13.g567050 | reverse transcriptase                            | 0.623 | 3.12E-02 | chromosome_13 | 759979  | 764417  | K14401 |
| CUST_10580_PI425379931 | Au9.Cre09.g411150 | hypothetical protein<br>CHLREDRAFT_192098        | 0.623 | 3.12E-02 | chromosome_9  | 3809422 | 3816787 |        |
| CUST_3312_PI425379931  | Au9.Cre13.g570850 | predicted protein                                | 0.622 | 1.73E-02 | chromosome_13 | 1256315 | 1259203 |        |
| CUST_10788_PI425379931 | Au9.Cre06.g272300 | hypothetical protein<br>CHLREDRAFT_167070        | 0.622 | 5.34E-03 | chromosome_6  | 2877776 | 2882001 |        |
| CUST_13859_PI425379931 | Au9.Cre05.g241050 | s-antigen                                        | 0.622 | 4.41E-02 | chromosome_5  | 2066029 | 2068504 |        |
| CUST_5173_PI425379931  | Au9.Cre03.g187450 | Ribose-5-phosphate isomerase                     | 0.622 | 2.66E-02 | chromosome_3  | 4648022 | 4649461 | K01807 |
| CUST_12244_PI425379931 | Au9.Cre13.g568850 | iron-sulfur cluster assembly scaffold<br>protein | 0.621 | 3.19E-02 | chromosome_13 | 1042030 | 1043126 | K00566 |
| CUST_8446_PI425379931  | Au9.Cre02.g092600 | Coproporphyrinogen III oxidase                   | 0.62  | 2.45E-02 | chromosome_2  | 2434062 | 2436694 | K00228 |
| CUST_4738_PI425379931  | Au9.Cre19.g751900 | ef hand family protein                           | 0.619 | 1.83E-02 | scaffold_19   | 43620   | 48885   |        |
| CUST_7864_PI425379931  | Au9.Cre12.g561100 | hypothetical protein<br>CHLREDRAFT_180470        | 0.619 | 2.10E-02 | chromosome_12 | 9249254 | 9253092 |        |
| CUST_11928_PI425379931 | Au9.Cre07.g321300 | ribonuclease p                                   | 0.619 | 2.53E-02 | chromosome_7  | 1204501 | 1207143 |        |
| CUST_10706_PI425379931 | Au9.Cre06.g289450 | suppression of tumorigenicity 5 (st5)            | 0.619 | 1.13E-02 | chromosome_6  | 4710968 | 4722369 |        |
| CUST_11850_PI425379931 | Au9.Cre05.g247400 | Protein with rhodanese-like domain               | 0.619 | 1.49E-02 | chromosome_5  | 3156075 | 3157905 |        |

|                        |                   |                                                      |       |          |               |         |         |        |
|------------------------|-------------------|------------------------------------------------------|-------|----------|---------------|---------|---------|--------|
| CUST_3623_PI425379931  | Au9.Cre13.g577850 | peptidyl-prolyl cis-trans isomerase,<br>FKBP-type    | 0.618 | 8.40E-03 | chromosome_13 | 2135193 | 2138435 |        |
| CUST_628_PI425379931   | Au9.Cre03.g208950 | endonuclease-reverse transcriptase                   | 0.618 | 1.96E-02 | chromosome_3  | 7298810 | 7303105 |        |
| CUST_10213_PI425379931 | Au9.Cre01.g039700 | predicted protein                                    | 0.617 | 1.91E-02 | chromosome_1  | 5424896 | 5432263 |        |
| CUST_5133_PI425379931  | Au9.Cre16.g688550 | glutathione-S-transferase                            | 0.616 | 3.55E-02 | chromosome_16 | 5542673 | 5544808 | K01830 |
| CUST_12658_PI425379931 | Au9.Cre14.g621650 | malonyl-CoA:acyl-carrier-protein<br>transacylase     | 0.616 | 1.25E-02 | chromosome_14 | 1998411 | 2002849 | K00645 |
| CUST_10944_PI425379931 | Au9.Cre09.g398350 | ubiquitination factor e4                             | 0.616 | 1.46E-02 | chromosome_9  | 1876556 | 1884718 | K10597 |
| CUST_3147_PI425379931  | Au9.Cre01.g019250 | sugar nucleotide epimerase                           | 0.616 | 4.98E-02 | chromosome_1  | 2906655 | 2909847 | K10046 |
| CUST_1278_PI425379931  | Au9.Cre05.g236500 | ceramidase                                           | 0.615 | 1.71E-02 | chromosome_5  | 1364534 | 1389634 |        |
| CUST_4824_PI425379931  | Au9.Cre13.g589700 | subunit of ESCRT-III complex                         | 0.613 | 6.46E-03 | chromosome_13 | 3845659 | 3848591 | K12195 |
| CUST_6349_PI425379931  | Au9.Cre12.g510050 | Copper target 1 protein                              | 0.613 | 2.23E-02 | chromosome_12 | 3029425 | 3032251 | K04035 |
| CUST_2171_PI425379931  | Au9.Cre08.g366950 | hypothetical protein<br>CHLREDRAFT_192240            | 0.613 | 4.05E-02 | chromosome_8  | 1421251 | 1427433 |        |
| CUST_3274_PI425379931  | Au9.Cre15.g646250 | nitrogen metabolic regulation<br>protein nmr-related | 0.612 | 0.00E+00 | chromosome_15 | 2792636 | 2796146 |        |
| CUST_7632_PI425379931  | Au9.Cre12.g549800 | Casein kinase II, alpha subunit                      | 0.612 | 1.13E-02 | chromosome_12 | 7775816 | 7780861 | K03097 |
| CUST_2003_PI425379931  | Au9.Cre09.g405800 | inosine-5-monophosphate<br>dehydrogenase related     | 0.611 | 1.51E-02 | chromosome_9  | 3007806 | 3011805 | K00088 |

|                        |                   |                                           |       |          |               |         |         |        |
|------------------------|-------------------|-------------------------------------------|-------|----------|---------------|---------|---------|--------|
| CUST_7272_P1425379931  | Au9.Cre20.g758650 | predicted protein                         | 0.61  | 3.68E-02 | scaffold_20   | 176300  | 180305  |        |
| CUST_4514_P1425379931  | Au9.Cre08.g380300 | peptide methionine sulfoxide reductase    | 0.61  | 1.13E-02 | chromosome_8  | 3355726 | 3358758 |        |
| CUST_2110_P1425379931  | Au9.Cre06.g289700 | Component of TRAPP complex                | 0.61  | 1.76E-02 | chromosome_6  | 4742440 | 4745465 | K13345 |
| CUST_14521_P1425379931 | Au9.Cre03.g186900 | hypothetical protein<br>CHLREDRAFT_170601 | 0.61  | 1.37E-02 | chromosome_3  | 4596007 | 4597076 | K12456 |
| CUST_2152_P1425379931  | Au9.Cre23.g766050 | cytochrome c oxidase assembly protein     | 0.609 | 6.62E-03 | scaffold_23   | 45623   | 46839   |        |
| CUST_522_P1425379931   | Au9.Cre13.g582500 | 14 kda phosphohistidine phosphatase       | 0.608 | 3.19E-02 | chromosome_13 | 2772784 | 2774485 |        |
| CUST_3479_P1425379931  | Au9.Cre10.g456450 | hypothetical protein<br>CHLREDRAFT_187697 | 0.608 | 1.85E-02 | chromosome_10 | 5134732 | 5137015 |        |
| CUST_7791_P1425379931  | Au9.Cre21.g762250 | hypothetical protein<br>CHLREDRAFT_154955 | 0.607 | 3.41E-02 | scaffold_21   | 496949  | 498830  |        |
| CUST_10969_P1425379931 | Au9.Cre13.g605900 |                                           | 0.607 | 1.13E-02 | chromosome_13 | 6278140 | 6291462 |        |
| CUST_11363_P1425379931 | Au9.Cre17.g730350 | predicted protein                         | 0.606 | 2.66E-02 | chromosome_17 | 4225041 | 4229173 |        |
| CUST_12440_P1425379931 | Au9.Cre09.g415200 | exostosin-like glycosyltransferase        | 0.606 | 8.07E-03 | chromosome_9  | 4431512 | 4438907 |        |
| CUST_5452_P1425379931  | Au9.Cre08.g379850 | serine-threonine protein kinase           | 0.606 | 1.08E-02 | chromosome_8  | 3286813 | 3296664 | K08016 |
| CUST_3725_P1425379931  | Au9.Cre01.g051800 | aspartate aminotransferase                | 0.606 | 0.00E+00 | chromosome_1  | 7190010 | 7194364 | K00812 |



|                        |                   |                                                       |       |          |               |         |         |        |
|------------------------|-------------------|-------------------------------------------------------|-------|----------|---------------|---------|---------|--------|
| CUST_9817_P1425379931  | Au9.Cre01.g045400 | predicted protein                                     | 0.606 | 3.68E-02 | chromosome_1  | 6214348 | 6218439 |        |
| CUST_7162_P1425379931  | Au9.Cre17.g725800 | hypothetical protein<br>CHLREDRAFT_184858             | 0.605 | 2.96E-02 | chromosome_17 | 3604395 | 3605489 |        |
| CUST_14011_P1425379931 | Au9.Cre12.g549950 | sft2 domain containing 2                              | 0.605 | 2.63E-02 | chromosome_12 | 7792737 | 7795826 |        |
| CUST_10030_P1425379931 | Au9.Cre01.g043100 | predicted protein                                     | 0.605 | 3.41E-02 | chromosome_1  | 5919250 | 5921388 | K08773 |
| CUST_6243_P1425379931  | Au9.Cre07.g355650 | Ammonium transporter                                  | 0.604 | 4.30E-03 | chromosome_7  | 5860391 | 5868381 |        |
| CUST_10259_P1425379931 | Au9.Cre05.g241800 | MaoC-like dehydratase                                 | 0.604 | 2.29E-02 | chromosome_5  | 2213266 | 2219337 |        |
| CUST_10583_P1425379931 | Au9.Cre22.g763750 | Similar to AtTic21/PIC1; was also<br>designated Tic21 | 0.602 | 2.66E-02 | scaffold_22   | 181128  | 184635  |        |
| CUST_5540_P1425379931  | Au9.Cre13.g589350 | flagellar/basal body protein                          | 0.602 | 4.34E-02 | chromosome_13 | 3797981 | 3802889 | K10798 |
| CUST_7128_P1425379931  | Au9.Cre16.g651350 | hypothetical protein<br>CHLREDRAFT_177124             | 0.601 | 7.73E-03 | chromosome_16 | 462920  | 471967  |        |
| CUST_5991_P1425379931  | Au9.Cre12.g511500 | predicted protein                                     | 0.601 | 8.40E-03 | chromosome_12 | 3186811 | 3188826 |        |
| CUST_6099_P1425379931  | Au9.Cre01.g026650 | molybdopterin binding domain<br>protein               | 0.601 | 0.00E+00 | chromosome_1  | 3900095 | 3903406 | K00953 |
| CUST_10036_P1425379931 | Au9.Cre12.g526050 | Holocytochrome-c synthase                             | 0.6   | 1.85E-02 | chromosome_12 | 4857766 | 4861178 |        |
| CUST_3973_P1425379931  | Au9.Cre06.g261150 | biotin synthase                                       | 0.6   | 1.03E-02 | chromosome_6  | 1659321 | 1665729 | K01012 |
| CUST_5217_P1425379931  | Au9.Cre17.g701800 | predicted protein                                     | 0.599 | 2.96E-02 | chromosome_17 | 789995  | 795807  |        |

|                        |                   |                                                                                 |       |          |               |         |         |        |
|------------------------|-------------------|---------------------------------------------------------------------------------|-------|----------|---------------|---------|---------|--------|
| CUST_3414_PI425379931  | Au9.Cre07.g330250 | Subunit H of photosystem I                                                      | 0.599 | 2.43E-02 | chromosome_7  | 2299558 | 2301177 | K02695 |
| CUST_11199_PI425379931 | Au9.Cre17.g713300 | light regulation of gametogenesis6<br>protein                                   | 0.598 | 2.83E-02 | chromosome_17 | 2208695 | 2219826 |        |
| CUST_12040_PI425379931 | Au9.Cre17.g703000 | predicted protein                                                               | 0.598 | 2.11E-02 | chromosome_17 | 945724  | 950919  |        |
| CUST_3497_PI425379931  | Au9.Cre10.g444050 | MaoC-like dehydratase                                                           | 0.598 | 1.71E-02 | chromosome_10 | 3328719 | 3336857 |        |
| CUST_8706_PI425379931  | Au9.Cre02.g112000 | amino acid transporter                                                          | 0.598 | 1.13E-02 | chromosome_2  | 5057375 | 5061430 |        |
| CUST_14077_PI425379931 | Au9.Cre12.g559500 | lecithin-cholesterol acyltransferase-<br>related                                | 0.597 | 4.86E-02 | chromosome_12 | 9043396 | 9047377 |        |
| CUST_9098_PI425379931  | Au9.Cre08.g369450 | ERD4-related membrane protein                                                   | 0.597 | 1.37E-02 | chromosome_8  | 1700575 | 1703504 |        |
| CUST_13840_PI425379931 | Au9.Cre07.g339800 | mitogen activated protein kinase<br>kinase kinase 5                             | 0.597 | 1.85E-02 | chromosome_7  | 3714563 | 3718198 |        |
| CUST_6404_PI425379931  | Au9.Cre02.g145050 | 4-diphosphocytidyl-2-C-methyl-D-<br>erythritol kinase, chloroplast<br>precursor | 0.597 | 1.91E-02 | chromosome_2  | 9599687 | 9602934 | K00919 |
| CUST_6904_PI425379931  | Au9.Cre26.g773100 | pap fibrillin family protein                                                    | 0.596 | 7.73E-03 | scaffold_26   | 144386  | 151880  |        |
| CUST_10881_PI425379931 | Au9.Cre13.g592250 | predicted protein                                                               | 0.596 | 1.45E-02 | chromosome_13 | 4308732 | 4311010 |        |
| CUST_6969_PI425379931  | Au9.Cre17.g739550 |                                                                                 | 0.595 | 3.89E-02 | chromosome_17 | 5859944 | 5878424 |        |
| CUST_2886_PI425379931  | Au9.Cre12.g522600 | Cytochrome c                                                                    | 0.595 | 4.41E-02 | chromosome_12 | 4462110 | 4463322 |        |

|                        |                   |                                             |       |          |               |         |         |        |
|------------------------|-------------------|---------------------------------------------|-------|----------|---------------|---------|---------|--------|
| CUST_3809_PI425379931  | Au9.Cre13.g594350 | hypothetical protein<br>CHLREDRAFT_151387   | 0.593 | 0.00E+00 | chromosome_13 | 4540160 | 4544124 |        |
| CUST_9698_PI425379931  | Au9.Cre16.g662050 | ERD4-related membrane protein               | 0.592 | 1.65E-02 | chromosome_16 | 1856053 | 1857962 |        |
| CUST_6727_PI425379931  | Au9.Cre16.g660000 | transmembrane protein htp-1<br>related      | 0.592 | 1.56E-02 | chromosome_16 | 1568658 | 1571497 |        |
| CUST_3383_PI425379931  | Au9.Cre08.g365850 | cartenoid oxygenase                         | 0.592 | 1.26E-02 | chromosome_8  | 1252873 | 1256403 |        |
| CUST_14468_PI425379931 | Au9.Cre07.g351550 | cct motif family protein                    | 0.592 | 1.13E-02 | chromosome_7  | 5305531 | 5313336 |        |
| CUST_11914_PI425379931 | Au9.Cre01.g056450 | synaptojanin 2 binding protein              | 0.592 | 1.49E-02 | chromosome_1  | 7837188 | 7839139 |        |
| CUST_253_PI425379931   | Au9.Cre12.g561750 | hypothetical protein<br>CHLREDRAFT_181247   | 0.591 | 7.21E-03 | chromosome_12 | 9341788 | 9345792 |        |
| CUST_6654_PI425379931  | Au9.Cre08.g367150 | major facilitator superfamily mfs_1         | 0.591 | 4.34E-02 | chromosome_8  | 1441457 | 1447780 | K13950 |
| CUST_12295_PI425379931 | Au9.Cre04.g214000 | scavenger receptor cysteine-rich<br>partial | 0.591 | 2.88E-02 | chromosome_4  | 401596  | 413151  | K13912 |
| CUST_13595_PI425379931 | Au9.Cre03.g173350 | ankyrin repeat-containing                   | 0.591 | 4.16E-02 | chromosome_3  | 3160003 | 3164319 | K11420 |
| CUST_3681_PI425379931  | Au9.Cre02.g124050 | ERD4-related membrane protein               | 0.591 | 1.49E-02 | chromosome_2  | 6510830 | 6513913 |        |
| CUST_3014_PI425379931  | Au9.Cre02.g083550 | fad monooxygenase                           | 0.591 | 2.66E-02 | chromosome_2  | 1300833 | 1306269 |        |
| CUST_7046_PI425379931  | Au9.Cre01.g071500 | guanylate cyclase                           | 0.59  | 3.89E-02 | chromosome_1  | 9763152 | 9774883 |        |
| CUST_6386_PI425379931  | Au9.Cre01.g016500 | Dihydrolipoamide dehydrogenase              | 0.59  | 1.04E-02 | chromosome_1  | 2587381 | 2593530 |        |

|                        |                   |                                                      |       |          |               |         |         |        |
|------------------------|-------------------|------------------------------------------------------|-------|----------|---------------|---------|---------|--------|
| CUST_10360_PI425379931 | Au9.Cre45.g788600 | predicted protein                                    | 0.589 | 3.19E-02 | scaffold_45   | 77644   | 78705   |        |
| CUST_12543_PI425379931 | Au9.Cre02.g119900 | Papain-type cysteine protease                        | 0.589 | 4.83E-02 | chromosome_2  | 6019560 | 6023185 | K08568 |
| CUST_11654_PI425379931 | Au9.Cre02.g144150 | eag-like k                                           | 0.588 | 2.88E-02 | chromosome_2  | 9484494 | 9489215 |        |
| CUST_11822_PI425379931 | Au9.Cre01.g006200 | predicted protein                                    | 0.587 | 2.18E-02 | chromosome_1  | 1055813 | 1057054 |        |
| CUST_5076_PI425379931  | Au9.Cre06.g276800 | Histone H4                                           | 0.586 | 3.04E-02 | chromosome_6  | 3249453 | 3250338 | K11254 |
| CUST_4595_PI425379931  | Au9.Cre75.g795400 | low molecular weight protein<br>tyrosine phosphatase | 0.585 | 1.22E-02 | scaffold_75   | 2036    | 5767    |        |
| CUST_10430_PI425379931 | Au9.Cre16.g672950 | Low CO2 inducible gene                               | 0.585 | 0.00E+00 | chromosome_16 | 3486205 | 3487938 |        |
| CUST_13568_PI425379931 | Au9.Cre06.g308950 | reticulon/nogo                                       | 0.585 | 1.37E-02 | chromosome_6  | 7276001 | 7278932 | K00861 |
| CUST_10533_PI425379931 | Au9.Cre05.g246300 | hypothetical protein<br>CHLREDRAFT_167657            | 0.585 | 2.29E-02 | chromosome_5  | 3011614 | 3016685 |        |
| CUST_11934_PI425379931 | Au9.Cre04.g215900 | tumor necrosis factor receptor<br>related            | 0.585 | 1.91E-02 | chromosome_4  | 711609  | 717125  |        |
| CUST_5165_PI425379931  | Au9.Cre17.g743050 | pol-like protein                                     | 0.584 | 1.00E-02 | chromosome_17 | 6455831 | 6459356 |        |
| CUST_7914_PI425379931  | Au9.Cre17.g726600 | MaoC-like dehydratase                                | 0.584 | 1.49E-02 | chromosome_17 | 3670063 | 3677814 |        |
| CUST_11634_PI425379931 | Au9.Cre07.g334500 | photosystem i subunit o                              | 0.584 | 2.18E-02 | chromosome_7  | 3035497 | 3038625 |        |
| CUST_352_PI425379931   | Au9.Cre08.g375800 | predicted protein                                    | 0.583 | 6.32E-03 | chromosome_8  | 2742755 | 2755901 |        |
| CUST_10266_PI425379931 | Au9.Cre06.g273050 | transcriptional regulator-like protein               | 0.583 | 7.97E-03 | chromosome_6  | 2934609 | 2937995 |        |

|                        |                   |                                                                          |       |          |               |         |         |        |
|------------------------|-------------------|--------------------------------------------------------------------------|-------|----------|---------------|---------|---------|--------|
| CUST_10745_PI425379931 | Au9.Cre52.g790500 | pol-like protein                                                         | 0.582 | 1.46E-02 | scaffold_52   | 24766   | 28067   |        |
| CUST_290_PI425379931   | Au9.Cre17.g715250 | Acetyl-CoA biotin carboxyl carrier                                       | 0.582 | 9.80E-03 | chromosome_17 | 2391327 | 2394327 | K02160 |
| CUST_9232_PI425379931  | Au9.Cre12.g561000 | Peptidyl-prolyl cis-trans isomerase,<br>cyclophilin-type                 | 0.581 | 1.76E-02 | chromosome_12 | 9234549 | 9237206 | K05864 |
| CUST_10798_PI425379931 | Au9.Cre10.g458750 | predicted protein                                                        | 0.581 | 4.00E-03 | chromosome_10 | 5458677 | 5460143 |        |
| CUST_14314_PI425379931 | Au9.Cre02.g137100 | MaoC-like dehydratase                                                    | 0.581 | 1.22E-02 | chromosome_2  | 8370748 | 8375299 |        |
| CUST_4879_PI425379931  | Au9.Cre11.g473400 | hypothetical protein<br>CHLREDRAFT_178998                                | 0.579 | 3.19E-02 | chromosome_11 | 999110  | 1004241 |        |
| CUST_945_PI425379931   | Au9.Cre04.g212700 | squamosa promoter binding protein                                        | 0.579 | 2.72E-02 | chromosome_4  | 152766  | 166064  |        |
| CUST_10385_PI425379931 | Au9.Cre08.g373050 | Acetyl-CoA carboxylase                                                   | 0.577 | 0.00E+00 | chromosome_8  | 2214546 | 2229831 |        |
| CUST_11241_PI425379931 | Au9.Cre06.g273900 | histone h2a                                                              | 0.577 | 8.40E-03 | chromosome_6  | 3005186 | 3005947 | K11251 |
| CUST_5315_PI425379931  | Au9.Cre01.g035250 | predicted protein [Micromonas sp.<br>RCC299]                             | 0.577 | 9.24E-03 | chromosome_1  | 4912723 | 4916638 |        |
| CUST_10658_PI425379931 | Au9.Cre08.g384100 | predicted protein                                                        | 0.576 | 4.74E-02 | chromosome_8  | 3852306 | 3854935 |        |
| CUST_8028_PI425379931  | Au9.Cre06.g285250 | chloropyll a-b binding protein of<br>LHCII type I, chloroplast precursor | 0.576 | 3.12E-02 | chromosome_6  | 4214720 | 4216568 |        |
| CUST_9506_PI425379931  | Au9.Cre01.g038500 | cytochrome P450                                                          | 0.576 | 1.22E-02 | chromosome_1  | 5302516 | 5306907 | K00517 |
| CUST_2577_PI425379931  | Au9.Cre14.g621550 | Thioredoxin m                                                            | 0.575 | 6.78E-03 | chromosome_14 | 1986954 | 1988066 |        |

|                        |                   |                                              |       |          |               |         |         |        |
|------------------------|-------------------|----------------------------------------------|-------|----------|---------------|---------|---------|--------|
| CUST_1131_PI425379931  | Au9.Cre14.g616500 | predicted protein                            | 0.574 | 4.86E-02 | chromosome_14 | 1258849 | 1260984 |        |
| CUST_13640_PI425379931 | Au9.Cre12.g496700 | thioredoxin-like protein                     | 0.574 | 3.41E-02 | chromosome_12 | 1656273 | 1658166 |        |
| CUST_5005_PI425379931  | Au9.Cre02.g076250 | chloroplast elongation factor G              | 0.574 | 2.24E-02 | chromosome_2  | 436382  | 441503  | K14536 |
| CUST_8649_PI425379931  | Au9.Cre07.g321950 | manganese transport protein                  | 0.573 | 4.15E-03 | chromosome_7  | 1270880 | 1278795 | K12347 |
| CUST_2129_PI425379931  | Au9.Cre08.g361700 | hypothetical protein<br>CHLREDRAFT_192195    | 0.572 | 2.18E-02 | chromosome_8  | 531462  | 534953  |        |
| CUST_2030_PI425379931  | Au9.Cre01.g022700 | predicted protein                            | 0.57  | 1.22E-02 | chromosome_1  | 3337740 | 3345813 |        |
| CUST_5734_PI425379931  | Au9.Cre02.g137300 | reverse transcriptases                       | 0.569 | 1.13E-02 | chromosome_2  | 8441582 | 8448157 |        |
| CUST_111_PI425379931   | Au9.Cre18.g751050 | predicted protein                            | 0.568 | 0.00E+00 | scaffold_18   | 1189612 | 1193467 |        |
| CUST_2449_PI425379931  | Au9.Cre06.g272650 | light-harvesting protein of<br>photosystem I | 0.568 | 2.69E-02 | chromosome_6  | 2906970 | 2909263 | K08911 |
| CUST_3461_PI425379931  | Au9.Cre05.g245500 | Flagellar Associated Protein                 | 0.568 | 7.73E-03 | chromosome_5  | 2870608 | 2882904 | K12460 |
| CUST_4923_PI425379931  | Au9.Cre01.g053850 | ring finger and wd repeat domain 2           | 0.568 | 3.12E-02 | chromosome_1  | 7468361 | 7473552 | K10143 |
| CUST_585_PI425379931   | Au9.Cre10.g433950 | hypothetical protein<br>CHLREDRAFT_155007    | 0.567 | 7.40E-03 | chromosome_10 | 2181051 | 2183008 |        |
| CUST_2625_PI425379931  | Au9.Cre07.g339150 | Chaperonin 60B2                              | 0.567 | 2.27E-02 | chromosome_7  | 3650489 | 3657567 | K04077 |
| CUST_13162_PI425379931 | Au9.Cre06.g249300 | Actin-related protein                        | 0.567 | 4.75E-03 | chromosome_6  | 61026   | 63399   | K05692 |
| CUST_10244_PI425379931 | Au9.Cre66.g793500 | hypothetical protein                         | 0.566 | 0.00E+00 | scaffold_66   | 11906   | 14491   |        |

|                        |                   |                                                   |       |          |               |         |         |        |
|------------------------|-------------------|---------------------------------------------------|-------|----------|---------------|---------|---------|--------|
|                        |                   | CHLREDRAFT_180952                                 |       |          |               |         |         |        |
| CUST_12360_P1425379931 | Au9.Cre12.g559800 | glutathione S-transferase                         | 0.566 | 8.40E-03 | chromosome_12 | 9101943 | 9104876 | K00799 |
| CUST_14589_P1425379931 | Au9.Cre01.g030550 | ubiquitin-associated uba/ubx<br>domain-containing | 0.566 | 0.00E+00 | chromosome_1  | 4316122 | 4321527 | K14011 |
| CUST_5242_P1425379931  | Au9.Cre16.g650500 | hypothetical protein                              | 0.565 | 4.30E-03 | chromosome_16 | 361125  | 365251  |        |
|                        |                   | CHLREDRAFT_120756                                 |       |          |               |         |         |        |
| CUST_5034_P1425379931  | Au9.Cre16.g647950 | hypothetical protein                              | 0.565 | 1.58E-02 | chromosome_16 | 64206   | 68557   |        |
|                        |                   | CHLREDRAFT_177206                                 |       |          |               |         |         |        |
| CUST_14012_P1425379931 | Au9.Cre02.g114450 | hypothetical protein                              | 0.564 | 0.00E+00 | chromosome_2  | 5365507 | 5368257 |        |
|                        |                   | CHLREDRAFT_186741                                 |       |          |               |         |         |        |
| CUST_7432_P1425379931  | Au9.Cre14.g630950 | rhodanese domain protein                          | 0.562 | 9.98E-03 | chromosome_14 | 3456971 | 3459121 | K01069 |
| CUST_6649_P1425379931  | Au9.Cre14.g629050 | plastocyanin-like protein                         | 0.562 | 4.05E-02 | chromosome_14 | 3144155 | 3147765 |        |
| CUST_1617_P1425379931  | Au9.Cre08.g370500 | aig2 family protein                               | 0.562 | 5.64E-03 | chromosome_8  | 1849788 | 1854812 |        |
| CUST_5466_P1425379931  | Au9.Cre08.g369600 | MATE efflux family protein                        | 0.562 | 4.30E-03 | chromosome_8  | 1711781 | 1718121 |        |
| CUST_12053_P1425379931 | Au9.Cre34.g783550 | predicted protein                                 | 0.56  | 4.75E-03 | scaffold_34   | 83416   | 87589   |        |
| CUST_6879_P1425379931  | Au9.Cre09.g416750 | T-complex protein 1, beta subunit                 | 0.56  | 6.32E-03 | chromosome_9  | 4621851 | 4626389 | K04077 |
| CUST_6418_P1425379931  | Au9.Cre03.g208050 | FABZ; 3R-hydroxymyristoyl ACP<br>dehydrase        | 0.56  | 6.32E-03 | chromosome_3  | 7067607 | 7069747 | K02372 |
| CUST_10864_P1425379931 | Au9.Cre03.g182150 | predicted protein                                 | 0.56  | 5.69E-03 | chromosome_3  | 4139796 | 4142105 |        |

|                        |                   |                                                               |       |          |               |         |         |        |
|------------------------|-------------------|---------------------------------------------------------------|-------|----------|---------------|---------|---------|--------|
| CUST_12571_P1425379931 | Au9.Cre16.g675450 | short-chain dehydrogenase<br>reductase superfamily protein    | 0.559 | 4.30E-03 | chromosome_16 | 3876466 | 3879665 | K00059 |
| CUST_5645_P1425379931  | Au9.Cre03.g203600 | glycerophosphoryl diester<br>phosphodiesterase family protein | 0.559 | 1.85E-02 | chromosome_3  | 6548603 | 6552111 | K01126 |
| CUST_789_P1425379931   | Au9.Cre17.g713200 | chloroplast oxoglutarate-malate<br>translocator               | 0.556 | 0.00E+00 | chromosome_17 | 2201731 | 2205794 | K09477 |
| CUST_1747_P1425379931  | Au9.Cre16.g655100 | thyroid hormone receptor interactor<br>4                      | 0.556 | 4.59E-02 | chromosome_16 | 974179  | 977180  |        |
| CUST_11853_P1425379931 | Au9.Cre10.g420400 | predicted protein                                             | 0.556 | 5.74E-03 | chromosome_10 | 337200  | 349471  | K14289 |
| CUST_3862_P1425379931  | Au9.Cre10.g422200 | copper-translocating P-type ATPase                            | 0.554 | 9.80E-03 | chromosome_10 | 660710  | 668515  | K01541 |
| CUST_6033_P1425379931  | Au9.Cre06.g263500 | zinc finger and btb domain<br>containing 8 opposite strand    | 0.554 | 3.96E-03 | chromosome_6  | 1905175 | 1907807 |        |
| CUST_6251_P1425379931  | Au9.Cre16.g652750 | Flavin-containing monooxygenase                               | 0.553 | 4.05E-02 | chromosome_16 | 665767  | 676282  | K00485 |
| CUST_13922_P1425379931 | Au9.Cre08.g358900 | hypoxanthine-guanine<br>phosphoribosyltransferase             | 0.553 | 1.13E-02 | chromosome_8  | 107490  | 110995  | K00760 |
| CUST_12877_P1425379931 | Au9.Cre03.g164300 | predicted protein                                             | 0.553 | 1.49E-02 | chromosome_3  | 2078252 | 2080460 |        |
| CUST_8720_P1425379931  | Au9.Cre17.g713350 | oxoglutarate:malate antiporter                                | 0.552 | 0.00E+00 | chromosome_17 | 2219831 | 2224233 | K09477 |
| CUST_3234_P1425379931  | Au9.Cre16.g665750 | Pseudouridine synthase                                        | 0.552 | 7.40E-03 | chromosome_16 | 2326900 | 2329928 | K11131 |
| CUST_13477_P1425379931 | Au9.Cre07.g328100 | hypothetical protein                                          | 0.552 | 1.22E-02 | chromosome_7  | 2022695 | 2025136 |        |



CHLREDRAFT\_182976

|                        |                   |                                                                        |       |          |               |         |         |        |
|------------------------|-------------------|------------------------------------------------------------------------|-------|----------|---------------|---------|---------|--------|
| CUST_7380_P1425379931  | Au9.Cre17.g711500 | predicted protein                                                      | 0.55  | 1.76E-02 | chromosome_17 | 2042231 | 2048652 |        |
| CUST_10810_P1425379931 | Au9.Cre16.g691400 | predicted protein                                                      | 0.55  | 4.30E-03 | chromosome_16 | 5921657 | 5928821 |        |
| CUST_12801_P1425379931 | Au9.Cre13.g569600 | Predicted cell growth/differentiation<br>regulator, contains RA domain | 0.55  | 2.72E-02 | chromosome_13 | 1117883 | 1124880 |        |
| CUST_13766_P1425379931 | Au9.Cre03.g198850 | thylakoid lumen protein                                                | 0.549 | 0.00E+00 | chromosome_3  | 5917725 | 5921290 |        |
| CUST_2382_P1425379931  | Au9.Cre58.g791500 | speract scavenger transmembrane<br>glycoprotein                        | 0.547 | 3.29E-02 | scaffold_58   | 13970   | 14475   |        |
| CUST_5872_P1425379931  | Au9.Cre16.g672650 | mitochondrial substrate carrier<br>protein                             | 0.546 | 1.13E-02 | chromosome_16 | 3450992 | 3454183 | K13577 |
| CUST_4403_P1425379931  | Au9.Cre16.g659450 | alpha-1,4-N-<br>acetylglucosaminyltransferase                          | 0.546 | 4.12E-03 | chromosome_16 | 1512801 | 1516493 | K01988 |
| CUST_8462_P1425379931  | Au9.Cre13.g584800 | predicted protein                                                      | 0.546 | 1.37E-02 | chromosome_13 | 3106862 | 3112795 |        |
| CUST_4469_P1425379931  | Au9.Cre13.g581000 | endoplasmic reticulum-resident kdel<br>protein                         | 0.545 | 8.29E-03 | chromosome_13 | 2597831 | 2602642 | K13667 |
| CUST_6338_P1425379931  | Au9.Cre02.g121050 | predicted protein                                                      | 0.545 | 4.75E-03 | chromosome_2  | 6201835 | 6204472 |        |
| CUST_5220_P1425379931  | Au9.Cre44.g788150 | hypothetical protein                                                   | 0.544 | 5.18E-03 | scaffold_44   | 63532   | 73515   |        |
| CHLREDRAFT_194403      |                   |                                                                        |       |          |               |         |         |        |
| CUST_3475_P1425379931  | Au9.Cre08.g367900 | hypothetical protein                                                   | 0.544 | 0.00E+00 | chromosome_8  | 1524092 | 1531427 |        |

|                        |                   |                                                         |       |          |               |         |         |        |
|------------------------|-------------------|---------------------------------------------------------|-------|----------|---------------|---------|---------|--------|
|                        |                   | CHLREDRAFT_184737                                       |       |          |               |         |         |        |
| CUST_2492_P1425379931  | Au9.Cre12.g527200 | hypothetical protein                                    | 0.543 | 2.24E-02 | chromosome_12 | 5014600 | 5016891 |        |
|                        |                   | CHLREDRAFT_184905                                       |       |          |               |         |         |        |
| CUST_6013_P1425379931  | Au9.Cre07.g330050 | hypothetical protein                                    | 0.543 | 1.91E-02 | chromosome_7  | 2279173 | 2282362 |        |
|                        |                   | CHLREDRAFT_169483                                       |       |          |               |         |         |        |
| CUST_12146_P1425379931 | Au9.Cre08.g383600 | Scavenger receptor cysteine rich<br>(SRCR) protein      | 0.542 | 4.34E-02 | chromosome_8  | 3785637 | 3795081 |        |
| CUST_841_P1425379931   | Au9.Cre05.g235100 | pol-like protein                                        | 0.542 | 0.00E+00 | chromosome_5  | 1036049 | 1047240 |        |
| CUST_14064_P1425379931 | Au9.Cre12.g538750 | Sm protein LSm1                                         | 0.541 | 0.00E+00 | chromosome_12 | 6418919 | 6420323 | K12620 |
| CUST_3503_P1425379931  | Au9.Cre12.g508300 | predicted protein                                       | 0.541 | 1.05E-02 | chromosome_12 | 2856510 | 2859201 |        |
| CUST_4563_P1425379931  | Au9.Cre02.g099050 |                                                         | 0.541 | 1.94E-02 | chromosome_2  | 3366406 | 3400337 |        |
| CUST_5780_P1425379931  | Au9.Cre12.g550850 | Oxygen-evolving enhancer protein 2<br>of photosystem II | 0.538 | 2.18E-02 | chromosome_12 | 7897719 | 7899791 | K02717 |
| CUST_10235_P1425379931 | Au9.Cre12.g520900 | hypothetical protein                                    | 0.534 | 1.46E-02 | chromosome_12 | 4274300 | 4276814 |        |
|                        |                   | CHLREDRAFT_150799                                       |       |          |               |         |         |        |
| CUST_758_P1425379931   | Au9.Cre12.g551300 | periplasmic L-amino acid oxidase,<br>catalytic subunit  | 0.533 | 0.00E+00 | chromosome_12 | 7947598 | 7953621 |        |
| CUST_11318_P1425379931 | Au9.Cre06.g262100 | glutathione reductase                                   | 0.531 | 0.00E+00 | chromosome_6  | 1741327 | 1747591 | K00383 |
| CUST_4583_P1425379931  | Au9.Cre14.g628500 | nad-dependent epimerase                                 | 0.527 | 2.66E-02 | chromosome_14 | 3024396 | 3026996 |        |

| dehydratase            |                   |                                              |       |          |               |         |         |        |
|------------------------|-------------------|----------------------------------------------|-------|----------|---------------|---------|---------|--------|
| CUST_5728_P1425379931  | Au9.Cre14.g621500 | predicted protein                            | 0.526 | 3.41E-02 | chromosome_14 | 1983951 | 1986702 |        |
| CUST_12215_P1425379931 | Au9.Cre12.g542300 | glycerate kinase                             | 0.525 | 4.00E-03 | chromosome_12 | 6953771 | 6957585 | K00865 |
| CUST_14541_P1425379931 | Au9.Cre05.g235050 | reverse transcriptases                       | 0.525 | 8.29E-03 | chromosome_5  | 1012463 | 1035038 |        |
| CUST_7855_P1425379931  | Au9.Cre17.g742950 | pol-like protein                             | 0.524 | 0.00E+00 | chromosome_17 | 6433131 | 6438396 |        |
| CUST_1540_P1425379931  | Au9.Cre17.g741950 | Bardet-Biedl syndrome protein 1              | 0.524 | 4.75E-03 | chromosome_17 | 6278390 | 6282341 |        |
| CUST_14551_P1425379931 | Au9.Cre03.g208450 | pol-like protein                             | 0.524 | 6.75E-03 | chromosome_3  | 7147393 | 7150998 |        |
| CUST_1005_P1425379931  | Au9.Cre02.g110900 | hypothetical protein                         | 0.524 | 0.00E+00 | chromosome_2  | 4905668 | 4909813 |        |
| CHLREDRAFT_186787      |                   |                                              |       |          |               |         |         |        |
| CUST_11052_P1425379931 | Au9.Cre05.g246900 | blue-copper- protein                         | 0.523 | 2.66E-02 | chromosome_5  | 3087124 | 3091271 |        |
| CUST_4612_P1425379931  | Au9.Cre16.g687900 | light-harvesting protein of<br>photosystem I | 0.522 | 2.23E-02 | chromosome_16 | 5478659 | 5481474 | K08911 |
| CUST_12579_P1425379931 | Au9.Cre04.g215450 | kelch-related proteins                       | 0.522 | 6.32E-03 | chromosome_4  | 654648  | 657035  |        |
| CUST_2539_P1425379931  | Au9.Cre01.g031500 | multi-copper oxidase                         | 0.522 | 3.19E-02 | chromosome_1  | 4424429 | 4431271 | K00423 |
| CUST_1485_P1425379931  | Au9.Cre03.g151450 | predicted protein                            | 0.521 | 3.68E-02 | chromosome_3  | 502316  | 505841  |        |
| CUST_11523_P1425379931 | Au9.Cre02.g080900 | Peroxiredoxin type II                        | 0.52  | 5.34E-03 | chromosome_2  | 1018282 | 1020848 | K11187 |
| CUST_7921_P1425379931  | Au9.Cre10.g421700 | glycerol-3-phosphate<br>dehydrogenase        | 0.519 | 1.76E-02 | chromosome_10 | 589661  | 599140  | K00006 |

|                        |                   |                                                                             |       |          |               |         |         |        |
|------------------------|-------------------|-----------------------------------------------------------------------------|-------|----------|---------------|---------|---------|--------|
| CUST_14080_PI425379931 | Au9.Cre13.g592600 | pol-like protein                                                            | 0.517 | 7.40E-03 | chromosome_13 | 4344665 | 4348370 |        |
| CUST_9106_PI425379931  | Au9.Cre11.g476750 | Ferredoxin-NADP reductase                                                   | 0.516 | 5.74E-03 | chromosome_11 | 1594720 | 1598363 | K02641 |
| CUST_6104_PI425379931  | Au9.Cre11.g468950 | Ubiquinol:cytochrome c<br>oxidoreductase 7 kDa subunit                      | 0.516 | 0.00E+00 | chromosome_11 | 292596  | 293513  | K00419 |
| CUST_6147_PI425379931  | Au9.Cre10.g440150 | hypothetical protein<br>CHLREDRAFT_182903                                   | 0.516 | 0.00E+00 | chromosome_10 | 2870566 | 2872513 |        |
| CUST_900_PI425379931   |                   |                                                                             | 0.516 | 2.24E-02 |               |         |         |        |
| CUST_8281_PI425379931  | Au9.Cre13.g573250 | Rhodanese-related sulfurtransferase                                         | 0.514 | 7.73E-03 | chromosome_13 | 1571992 | 1574347 |        |
| CUST_233_PI425379931   | Au9.Cre02.g077950 | rwd domain containing 3                                                     | 0.514 | 9.24E-03 | chromosome_2  | 617471  | 627832  |        |
| CUST_2632_PI425379931  | Au9.Cre14.g628350 | peptidase subunit of mitochondrial<br>ATP-dependent protease hslUV          | 0.513 | 4.59E-03 | chromosome_14 | 3013710 | 3016751 |        |
| CUST_3226_PI425379931  | Au9.Cre03.g188400 | Respiratory burst oxidase                                                   | 0.513 | 3.04E-02 | chromosome_3  | 4740745 | 4745844 | K13447 |
| CUST_10755_PI425379931 | Au9.Cre01.g038750 | chromosome 7 open reading frame<br>62                                       | 0.513 | 2.24E-02 | chromosome_1  | 5330795 | 5334037 |        |
| CUST_752_PI425379931   | Au9.Cre01.g006750 | polyprotein-like                                                            | 0.513 | 6.09E-03 | chromosome_1  | 1157297 | 1163772 | K10592 |
| CUST_2476_PI425379931  | Au9.Cre16.g660650 | hypothetical protein pK2044_00930<br>[Klebsiella pneumoniae NTUH-<br>K2044] | 0.512 | 5.34E-03 | chromosome_16 | 1650262 | 1656673 |        |
| CUST_6105_PI425379931  | Au9.Cre12.g539450 | pol-like protein                                                            | 0.512 | 1.83E-02 | chromosome_12 | 6572079 | 6577193 |        |

|                        |                   |                                                          |       |          |               |         |         |        |
|------------------------|-------------------|----------------------------------------------------------|-------|----------|---------------|---------|---------|--------|
| CUST_4102_PI425379931  | Au9.Cre02.g121750 | tim-barrel nifr3 family                                  | 0.512 | 3.12E-02 | chromosome_2  | 6274715 | 6277686 |        |
| CUST_3039_PI425379931  | Au9.Cre02.g082500 | photosystem I reaction center<br>subunit N               | 0.512 | 0.00E+00 | chromosome_2  | 1184182 | 1186249 | K02701 |
| CUST_1752_PI425379931  | Au9.Cre03.g193950 | ferredoxin-thioredoxin reductase                         | 0.511 | 0.00E+00 | chromosome_3  | 5353543 | 5355050 |        |
| CUST_9736_PI425379931  | Au9.Cre17.g721350 | glutathione s-transferase                                | 0.509 | 2.66E-02 | chromosome_17 | 3123963 | 3128955 | K00799 |
| CUST_7095_PI425379931  | Au9.Cre03.g155350 | pyridoxamine 5 -phosphate oxidase<br>family protein      | 0.509 | 1.09E-02 | chromosome_3  | 956665  | 961695  |        |
| CUST_8096_PI425379931  | Au9.Cre13.g573200 | predicted protein                                        | 0.508 | 4.59E-02 | chromosome_13 | 1567875 | 1571846 |        |
| CUST_1388_PI425379931  | Au9.Cre20.g761100 | pol-like protein                                         | 0.507 | 1.91E-02 | scaffold_20   | 572936  | 576221  |        |
| CUST_11589_PI425379931 | Au9.Cre17.g733250 | peptidyl-prolyl cis-trans isomerase,<br>FKBP-type        | 0.507 | 1.65E-02 | chromosome_17 | 4736083 | 4739704 |        |
| CUST_9021_PI425379931  | Au9.Cre12.g553150 | allophanate hydrolase                                    | 0.507 | 3.12E-02 | chromosome_12 | 8249951 | 8250562 |        |
| CUST_9969_PI425379931  | Au9.Cre03.g208650 | pol-like protein                                         | 0.507 | 0.00E+00 | chromosome_3  | 7227320 | 7231915 |        |
| CUST_13858_PI425379931 | Au9.Cre02.g082750 | 4.1 kDa photosystem II subunit                           | 0.506 | 2.89E-02 | chromosome_2  | 1208647 | 1209571 |        |
| CUST_11042_PI425379931 | Au9.Cre10.g443500 | hypothetical protein<br>CHLREDRAFT_188331                | 0.505 | 0.00E+00 | chromosome_10 | 3261803 | 3264759 |        |
| CUST_1923_PI425379931  | Au9.Cre13.g578700 | predicted protein                                        | 0.504 | 0.00E+00 | chromosome_13 | 2255685 | 2257146 |        |
| CUST_7134_PI425379931  | Au9.Cre12.g496000 | Peptidyl-prolyl cis-trans isomerase,<br>cyclophilin-type | 0.504 | 0.00E+00 | chromosome_12 | 1566196 | 1569316 | K09565 |

|                        |                   |                                  |       |          |               |         |         |        |
|------------------------|-------------------|----------------------------------|-------|----------|---------------|---------|---------|--------|
| CUST_10124_P1425379931 | Au9.Cre02.g107000 | cyclin dependent kinase          | 0.502 | 2.83E-02 | chromosome_2  | 4422666 | 4427701 | K04563 |
| CUST_5200_P1425379931  | Au9.Cre07.g333800 | pol-like protein                 | 0.501 | 0.00E+00 | chromosome_7  | 2929765 | 2931570 |        |
| CUST_13824_P1425379931 | Au9.Cre06.g265750 | glycosyltransferase-like isoform | 0.501 | 1.36E-02 | chromosome_6  | 2139123 | 2143131 |        |
|                        |                   | cra_a                            |       |          |               |         |         |        |
| CUST_11878_P1425379931 | Au9.Cre02.g087700 | ascorbate peroxidase             | 0.501 | 0.00E+00 | chromosome_2  | 1773933 | 1777822 | K00434 |
| CUST_9446_P1425379931  | Au9.Cre03.g156050 | ribosome recycling factor        | 0.5   | 7.73E-03 | chromosome_3  | 1043818 | 1046909 |        |
| CUST_181_P1425379931   | Au9.Cre51.g790150 | pol-like protein                 | 0.499 | 0.00E+00 | scaffold_51   | 27926   | 32567   |        |
| CUST_3105_P1425379931  | Au9.Cre22.g763350 | hypoxia-inducible factor 1 alpha | 0.499 | 2.96E-02 | scaffold_22   | 132230  | 137475  |        |
|                        |                   | inhibitor-related                |       |          |               |         |         |        |
| CUST_7076_P1425379931  | Au9.Cre03.g210350 | hypothetical protein             | 0.499 | 4.75E-03 | chromosome_3  | 7563381 | 7565147 |        |
|                        |                   | CHLREDRAFT_193444                |       |          |               |         |         |        |
| CUST_13820_P1425379931 | Au9.Cre06.g278100 | pol-like protein                 | 0.498 | 1.58E-02 | chromosome_6  | 3452555 | 3455580 |        |
| CUST_1231_P1425379931  | Au9.Cre16.g689300 | Serine/Threonine protein kinase  | 0.497 | 2.11E-02 | chromosome_16 | 5656971 | 5661328 | K02644 |
| CUST_11837_P1425379931 | Au9.Cre14.g631600 | nadp oxidoreductase coenzyme     | 0.497 | 2.27E-02 | chromosome_14 | 3587530 | 3590545 |        |
|                        |                   | f420-dependent                   |       |          |               |         |         |        |
| CUST_4413_P1425379931  | Au9.Cre01.g043950 | serine-threonine protein kinase  | 0.496 | 6.32E-03 | chromosome_1  | 6010070 | 6015155 |        |
| CUST_6152_P1425379931  | Au9.Cre10.g419650 | predicted protein                | 0.493 | 0.00E+00 | chromosome_10 | 276934  | 278599  |        |
| CUST_6354_P1425379931  | Au9.Cre08.g372150 | hypothetical protein             | 0.493 | 4.41E-02 | chromosome_8  | 2077746 | 2080857 |        |
|                        |                   | CHLREDRAFT_179255                |       |          |               |         |         |        |

|                        |                   |                                             |       |          |               |         |         |        |
|------------------------|-------------------|---------------------------------------------|-------|----------|---------------|---------|---------|--------|
| CUST_2580_P1425379931  | Au9.Cre06.g284250 | chlorophyll a-b binding protein of<br>LHCII | 0.492 | 9.24E-03 | chromosome_6  | 4101494 | 4103651 |        |
| CUST_11670_P1425379931 | Au9.Cre02.g086100 | predicted protein                           | 0.491 | 1.85E-02 | chromosome_2  | 1590172 | 1592064 |        |
| CUST_5372_P1425379931  | Au9.Cre37.g785000 | pol-like protein                            | 0.489 | 0.00E+00 | scaffold_37   | 118236  | 121737  |        |
| CUST_2712_P1425379931  | Au9.Cre06.g278000 | pol-like protein                            | 0.489 | 1.83E-02 | chromosome_6  | 3425035 | 3427960 |        |
| CUST_7002_P1425379931  | Au9.Cre03.g154750 | predicted protein                           | 0.489 | 1.39E-02 | chromosome_3  | 895914  | 898935  |        |
| CUST_12089_P1425379931 | Au9.Cre12.g489300 | notch-like protein                          | 0.488 | 3.56E-02 | chromosome_12 | 746884  | 754442  |        |
| CUST_8394_P1425379931  | Au9.Cre10.g446500 | hypothetical protein<br>CHLREDRAFT_155961   | 0.488 | 6.32E-03 | chromosome_10 | 3718054 | 3721085 |        |
| CUST_9043_P1425379931  | Au9.Cre04.g220050 | tak1                                        | 0.487 | 2.43E-02 | chromosome_4  | 1411080 | 1422441 | K04427 |
| CUST_2977_P1425379931  | Au9.Cre17.g743100 | pol-like protein                            | 0.486 | 4.15E-03 | chromosome_17 | 6473691 | 6477056 |        |
| CUST_1121_P1425379931  | Au9.Cre12.g547350 | guanylate cyclase                           | 0.486 | 1.85E-02 | chromosome_12 | 7504865 | 7527665 |        |
| CUST_4679_P1425379931  | Au9.Cre16.g648950 | hypothetical protein<br>CHLREDRAFT_193213   | 0.485 | 1.91E-02 | chromosome_16 | 185424  | 189274  |        |
| CUST_7563_P1425379931  | Au9.Cre05.g244800 | transcriptional repressor                   | 0.485 | 7.79E-03 | chromosome_5  | 2737166 | 2746995 |        |
| CUST_1942_P1425379931  | Au9.Cre12.g539300 | heat shock protein 70d                      | 0.483 | 0.00E+00 | chromosome_12 | 6540184 | 6543155 |        |
| CUST_1286_P1425379931  | Au9.Cre22.g764150 | hypothetical protein                        | 0.482 | 2.72E-02 | scaffold_22   | 230107  | 232858  |        |
| CUST_7892_P1425379931  | Au9.Cre10.g435500 | Elongation factor Ts-like protein           | 0.482 | 1.13E-02 | chromosome_10 | 2372714 | 2375412 |        |

|                        |                   |                                                        |       |          |               |         |         |        |
|------------------------|-------------------|--------------------------------------------------------|-------|----------|---------------|---------|---------|--------|
| CUST_5478_PI425379931  | unknown           |                                                        | 0.481 | 4.75E-03 |               |         |         |        |
| CUST_10087_PI425379931 | Au9.Cre01.g016900 | predicted protein                                      | 0.481 | 0.00E+00 | chromosome_1  | 2638858 | 2640709 |        |
| CUST_8586_PI425379931  | Au9.Cre03.g185750 | ubiquitination factor e4                               | 0.48  | 0.00E+00 | chromosome_3  | 4489065 | 4492226 | K09561 |
| CUST_14155_PI425379931 | Au9.Cre03.g184250 | Calmodulin                                             | 0.478 | 2.53E-02 | chromosome_3  | 4340377 | 4343434 |        |
| CUST_6959_PI425379931  | Au9.Cre22.g763650 | predicted protein                                      | 0.477 | 3.12E-02 | scaffold_22   | 168056  | 173407  |        |
| CUST_546_PI425379931   | Au9.Cre30.g779150 | pol-like protein                                       | 0.475 | 0.00E+00 | scaffold_30   | 33670   | 40205   |        |
| CUST_8892_PI425379931  | Au9.Cre07.g333750 | pol-like protein                                       | 0.474 | 4.16E-02 | chromosome_7  | 2880201 | 2892812 |        |
| CUST_3612_PI425379931  | Au9.Cre10.g446350 | oxygen-evolving enhancer                               | 0.473 | 1.85E-02 | chromosome_10 | 3704995 | 3707907 |        |
| CUST_12602_PI425379931 | Au9.Cre03.g200250 | mutase family protein                                  | 0.472 | 0.00E+00 | chromosome_3  | 6073984 | 6078549 | K03417 |
| CUST_9910_PI425379931  | Au9.Cre03.g158450 | predicted protein                                      | 0.472 | 4.34E-02 | chromosome_3  | 1359457 | 1371072 |        |
| CUST_6371_PI425379931  | Au9.Cre03.g177700 | transcription factor regulating<br>nitrogen metabolism | 0.47  | 0.00E+00 | chromosome_3  | 3705187 | 3712021 |        |
| CUST_2234_PI425379931  | Au9.Cre01.g065350 | hypothetical protein<br>CHLREDRAFT_149836              | 0.47  | 1.13E-02 | chromosome_1  | 8957478 | 8967473 |        |
| CUST_14035_PI425379931 | Au9.Cre12.g537900 | predicted protein                                      | 0.467 | 1.85E-02 | chromosome_12 | 6338874 | 6342935 | K03846 |
| CUST_3278_PI425379931  | Au9.Cre25.g771250 | hypothetical protein<br>CHLREDRAFT_177541              | 0.466 | 3.29E-02 | scaffold_25   | 96496   | 101057  |        |
| CUST_172_PI425379931   | Au9.Cre13.g602200 | pol-like protein                                       | 0.466 | 2.83E-02 | chromosome_13 | 5549562 | 5551723 |        |



|                        |                   |                                                        |       |          |               |         |         |        |
|------------------------|-------------------|--------------------------------------------------------|-------|----------|---------------|---------|---------|--------|
| CUST_1182_P1425379931  | Au9.Cre04.g218550 | predicted protein                                      | 0.466 | 3.41E-02 | chromosome_4  | 1166316 | 1169827 |        |
| CUST_3120_P1425379931  | Au9.Cre03.g153600 | predicted protein                                      | 0.466 | 1.46E-02 | chromosome_3  | 763465  | 769260  |        |
| CUST_13749_P1425379931 | Au9.Cre02.g097200 | Scavenger receptor cysteine rich<br>(SRCR) protein     | 0.466 | 7.88E-03 | chromosome_2  | 3135328 | 3150135 |        |
| CUST_7682_P1425379931  | Au9.Cre05.g239050 | S-adenosyl-L-methionine-dependent<br>methyltransferase | 0.464 | 7.88E-03 | chromosome_5  | 1772636 | 1782011 | K00599 |
| CUST_5198_P1425379931  | Au9.Cre10.g425900 | light-harvesting protein of<br>photosystem I           | 0.463 | 3.89E-02 | chromosome_10 | 1160709 | 1163206 | K08910 |
| CUST_1331_P1425379931  | Au9.Cre08.g360650 | hypothetical protein<br>CHLREDRAFT_194775              | 0.463 | 0.00E+00 | chromosome_8  | 390207  | 391704  |        |
| CUST_3683_P1425379931  | Au9.Cre07.g330800 | hypothetical protein<br>CHLREDRAFT_144346              | 0.463 | 1.13E-02 | chromosome_7  | 2358363 | 2362954 |        |
| CUST_9695_P1425379931  | Au9.Cre12.g497300 | Rhodanese-like Ca-sensing receptor                     | 0.461 | 0.00E+00 | chromosome_12 | 1707290 | 1710715 |        |
| CUST_9407_P1425379931  | Au9.Cre11.g470100 | pol-like protein                                       | 0.461 | 3.41E-02 | chromosome_11 | 466455  | 467286  |        |
| CUST_4949_P1425379931  | Au9.Cre10.g451850 | katanin p60 atpase-containing                          | 0.461 | 1.37E-02 | chromosome_10 | 4474499 | 4479133 | K12196 |
| CUST_12234_P1425379931 | Au9.Cre02.g137450 | pol-like protein                                       | 0.461 | 2.53E-02 | chromosome_2  | 8518341 | 8528316 |        |
| CUST_7821_P1425379931  | Au9.Cre09.g395900 | serine-threonine protein kinase,<br>plant-type         | 0.46  | 0.00E+00 | chromosome_9  | 1490613 | 1495915 |        |
| CUST_662_P1425379931   | Au9.Cre08.g373350 | pol-like protein                                       | 0.46  | 2.66E-02 | chromosome_8  | 2296640 | 2298075 |        |

|                        |                   |                                                  |       |          |               |         |         |        |
|------------------------|-------------------|--------------------------------------------------|-------|----------|---------------|---------|---------|--------|
| CUST_4106_PI425379931  | Au9.Cre14.g622300 | reverse transcriptase                            | 0.458 | 2.63E-02 | chromosome_14 | 2142809 | 2157504 |        |
| CUST_1289_PI425379931  | Au9.Cre47.g789200 | pol-like protein                                 | 0.457 | 3.56E-02 | scaffold_47   | 1       | 2997    |        |
| CUST_3356_PI425379931  | Au9.Cre05.g243300 | carbonic anhydrase                               | 0.457 | 4.22E-03 | chromosome_5  | 2467647 | 2468772 |        |
| CUST_2199_PI425379931  | Au9.Cre14.g622500 | pol-like protein                                 | 0.456 | 3.19E-02 | chromosome_14 | 2193639 | 2194464 |        |
| CUST_2777_PI425379931  | Au9.Cre14.g622450 | reverse transcriptases                           | 0.456 | 6.32E-03 | chromosome_14 | 2183235 | 2193006 | K14401 |
| CUST_8196_PI425379931  | Au9.Cre01.g024600 | predicted protein                                | 0.456 | 0.00E+00 | chromosome_1  | 3633042 | 3634083 |        |
| CUST_10729_PI425379931 | Au9.Cre17.g719350 | flagellar associated protein                     | 0.455 | 4.10E-02 | chromosome_17 | 2856126 | 2864885 |        |
| CUST_1818_PI425379931  | Au9.Cre06.g310600 | hypothetical protein                             | 0.453 | 8.40E-03 | chromosome_6  | 7517138 | 7521099 |        |
|                        |                   | CHLREDRAFT_169965                                |       |          |               |         |         |        |
| CUST_7552_PI425379931  | Au9.Cre47.g789250 | reverse transcriptases                           | 0.452 | 2.06E-02 | scaffold_47   | 5320    | 27235   |        |
| CUST_395_PI425379931   | Au9.Cre30.g779400 | pol-like protein                                 | 0.452 | 0.00E+00 | scaffold_30   | 152466  | 157997  |        |
| CUST_14455_PI425379931 | Au9.Cre03.g192150 | predicted protein                                | 0.452 | 2.53E-02 | chromosome_3  | 5157445 | 5159065 |        |
| CUST_10956_PI425379931 | Au9.Cre14.g622350 | pol-like protein                                 | 0.451 | 0.00E+00 | chromosome_14 | 2158555 | 2162076 |        |
| CUST_11737_PI425379931 | Au9.Cre16.g671250 | monovalent cation:proton<br>antiporter-1 family  | 0.45  | 1.59E-02 | chromosome_16 | 3261502 | 3271019 | K05742 |
| CUST_5761_PI425379931  | Au9.Cre12.g539550 | pol-like protein                                 | 0.45  | 3.41E-02 | chromosome_12 | 6624254 | 6627095 |        |
| CUST_4159_PI425379931  | Au9.Cre12.g504650 | Histone H3; Histone H3;Histone H3;<br>Histone H3 | 0.45  | 4.30E-03 | chromosome_12 | 2448006 | 2449053 | K11253 |

|                        |                   |                                                                                  |       |          |               |         |         |        |
|------------------------|-------------------|----------------------------------------------------------------------------------|-------|----------|---------------|---------|---------|--------|
| CUST_11465_PI425379931 | Au9.Cre06.g281600 | low-CO2-inducible protein                                                        | 0.45  | 2.11E-02 | chromosome_6  | 3840388 | 3845932 |        |
| CUST_3690_PI425379931  | Au9.Cre16.g682200 | hypothetical protein<br>CHLREDRAFT_189273                                        | 0.449 | 4.59E-03 | chromosome_16 | 4747689 | 4749870 |        |
| CUST_12899_PI425379931 | Au9.Cre11.g477350 | hypothetical protein<br>CHLREDRAFT_151152                                        | 0.447 | 1.49E-02 | chromosome_11 | 1679374 | 1684015 |        |
| CUST_2923_PI425379931  | Au9.Cre12.g544600 | predicted protein                                                                | 0.446 | 2.69E-02 | chromosome_12 | 7199002 | 7203373 |        |
| CUST_11386_PI425379931 | Au9.Cre36.g784450 | predicted protein                                                                | 0.443 | 1.76E-02 | scaffold_36   | 106406  | 109747  |        |
| CUST_4866_PI425379931  | Au9.Cre30.g779500 | pol-like protein                                                                 | 0.443 | 3.12E-02 | scaffold_30   | 236554  | 237710  |        |
| CUST_5958_PI425379931  | Au9.Cre10.g428950 | thij/pfpi                                                                        | 0.442 | 3.93E-02 | chromosome_10 | 1480486 | 1485172 | K01423 |
| CUST_9505_PI425379931  | Au9.Cre06.g271200 | NADH oxidase                                                                     | 0.441 | 4.59E-03 | chromosome_6  | 2782063 | 2789311 | K00356 |
| CUST_5045_PI425379931  | Au9.Cre09.g399600 | predicted protein                                                                | 0.44  | 1.73E-02 | chromosome_9  | 2084058 | 2084502 |        |
| CUST_5858_PI425379931  | Au9.Cre06.g295450 | Hydroxypyruvate reductase                                                        | 0.44  | 6.46E-03 | chromosome_6  | 5562721 | 5568069 | K00015 |
| CUST_1991_PI425379931  | Au9.Cre01.g067900 | 4-diphosphocytidyl-2C-methyl-D-<br>erythritol synthase, chloroplast<br>precursor | 0.439 | 2.11E-02 | chromosome_1  | 9303376 | 9304946 |        |
| CUST_12684_PI425379931 | Au9.Cre10.g466850 | peptidyl-prolyl cis-trans isomerase,<br>FKBP-type                                | 0.438 | 1.28E-02 | chromosome_10 | 6527735 | 6530338 |        |
| CUST_1128_PI425379931  | Au9.Cre18.g747750 | gamma hydroxybutyrate<br>dehydrogenase                                           | 0.437 | 1.73E-02 | scaffold_18   | 683913  | 687280  |        |

|                        |                   |                                                     |       |          |               |         |         |        |
|------------------------|-------------------|-----------------------------------------------------|-------|----------|---------------|---------|---------|--------|
| CUST_649_PI425379931   | Au9.Cre03.g211450 | hnh endonuclease                                    | 0.437 | 0.00E+00 | chromosome_3  | 7751790 | 7758713 |        |
| CUST_916_PI425379931   | Au9.Cre51.g790050 | pol-like protein                                    | 0.436 | 1.13E-02 | scaffold_51   | 54      | 2197    |        |
| CUST_11245_PI425379931 | Au9.Cre02.g138350 | predicted protein                                   | 0.436 | 2.45E-02 | chromosome_2  | 8639904 | 8642016 |        |
| CUST_13718_PI425379931 | Au9.Cre16.g691800 | flavoprotein                                        | 0.435 | 0.00E+00 | chromosome_16 | 5966693 | 5976578 | K00492 |
| CUST_2518_PI425379931  | Au9.Cre06.g283050 | light-harvesting protein of<br>photosystem I        | 0.432 | 1.35E-02 | chromosome_6  | 3977925 | 3980018 |        |
| CUST_14407_PI425379931 | Au9.Cre07.g332250 | R1 Protein, alpha-glucan water<br>dikinase          | 0.429 | 9.73E-03 | chromosome_7  | 2542476 | 2546157 |        |
| CUST_6550_PI425379931  | Au9.Cre01.g013000 | dna polymerase type-x family<br>member              | 0.429 | 1.49E-02 | chromosome_1  | 2183177 | 2190822 |        |
| CUST_6791_PI425379931  | Au9.Cre13.g605500 | hypothetical protein<br>CHLREDRAFT_177705           | 0.427 | 7.21E-03 | chromosome_13 | 6231021 | 6234699 |        |
| CUST_10773_PI425379931 | Au9.Cre03.g151950 | zygote-specific protein                             | 0.426 | 0.00E+00 | chromosome_3  | 540726  | 541665  |        |
| CUST_4293_PI425379931  | Au9.Cre10.g436050 | superoxide dismutase [Fe]                           | 0.424 | 0.00E+00 | chromosome_10 | 2439589 | 2440792 | K04564 |
| CUST_12025_PI425379931 | Au9.Cre17.g696750 |                                                     | 0.423 | 1.91E-02 | chromosome_17 | 81150   | 91425   | K14491 |
| CUST_5035_PI425379931  | Au9.Cre12.g545900 | Mitogen Activated Protein Kinase<br>Kinase Kinase 9 | 0.422 | 3.93E-02 | chromosome_12 | 7359012 | 7361753 |        |
| CUST_13228_PI425379931 | Au9.Cre12.g510400 | predicted protein                                   | 0.422 | 6.32E-03 | chromosome_12 | 3099250 | 3101737 |        |
| CUST_11905_PI425379931 | Au9.Cre11.g467850 | taz protein (tafazzin)                              | 0.422 | 1.26E-02 | chromosome_11 | 71345   | 76056   |        |

|                        |                   |                                           |       |          |               |         |         |        |
|------------------------|-------------------|-------------------------------------------|-------|----------|---------------|---------|---------|--------|
| CUST_8859_PI425379931  | Au9.Cre02.g130450 | predicted protein                         | 0.422 | 2.72E-02 | chromosome_2  | 7308696 | 7311818 |        |
| CUST_12873_PI425379931 | Au9.Cre24.g769600 | na <sup>+</sup> h <sup>+</sup> antiporter | 0.421 | 2.88E-02 | scaffold_24   | 109526  | 115117  |        |
| CUST_8063_PI425379931  | Au9.Cre24.g769400 | apospory-associated protein c-<br>related | 0.421 | 1.13E-02 | scaffold_24   | 88986   | 93717   |        |
| CUST_1517_PI425379931  | Au9.Cre16.g666650 | pol-related                               | 0.421 | 1.91E-02 | chromosome_16 | 2515636 | 2521971 |        |
| CUST_4575_PI425379931  | Au9.Cre16.g666900 | pol-like protein                          | 0.42  | 1.13E-02 | chromosome_16 | 2570960 | 2572561 |        |
| CUST_1495_PI425379931  | Au9.Cre13.g566000 | Formate-tetrahydrofolate ligase           | 0.417 | 0.00E+00 | chromosome_13 | 607997  | 618347  | K00288 |
| CUST_11254_PI425379931 | Au9.Cre09.g402200 | predicted protein                         | 0.417 | 0.00E+00 | chromosome_9  | 2519998 | 2521907 |        |
| CUST_5056_PI425379931  | Au9.Cre07.g312700 | pol-like protein                          | 0.414 | 7.40E-03 | chromosome_7  | 82530   | 87825   |        |
| CUST_7476_PI425379931  | Au9.Cre03.g158800 | s-formylglutathione hydrolase             | 0.414 | 0.00E+00 | chromosome_3  | 1411873 | 1414864 | K01070 |
| CUST_3679_PI425379931  | Au9.Cre12.g555350 | ER retention protein                      | 0.413 | 5.30E-03 | chromosome_12 | 8516750 | 8518539 |        |
| CUST_4806_PI425379931  | Au9.Cre07.g341400 | MaoC-like dehydratase                     | 0.413 | 8.40E-03 | chromosome_7  | 3938433 | 3950759 |        |
| CUST_4112_PI425379931  | Au9.Cre06.g263550 | R53.5-related protein                     | 0.413 | 0.00E+00 | chromosome_6  | 1907913 | 1909951 |        |
| CUST_7077_PI425379931  | Au9.Cre01.g050550 | predicted protein                         | 0.413 | 0.00E+00 | chromosome_1  | 6938305 | 6939505 |        |
| CUST_1820_PI425379931  | Au9.Cre11.g469950 | MaoC-like dehydratase                     | 0.412 | 6.46E-03 | chromosome_11 | 411455  | 421021  |        |
| CUST_5003_PI425379931  | Au9.Cre17.g743000 | reverse transcriptases                    | 0.411 | 2.63E-02 | chromosome_17 | 6444217 | 6452308 |        |
| CUST_1304_PI425379931  | Au9.Cre03.g208400 | reverse transcriptases                    | 0.408 | 1.13E-02 | chromosome_3  | 7132659 | 7140570 |        |

|                        |                   |                                                                                                 |       |          |               |         |         |        |
|------------------------|-------------------|-------------------------------------------------------------------------------------------------|-------|----------|---------------|---------|---------|--------|
| CUST_4521_PI425379931  | Au9.Cre03.g164000 | predicted protein                                                                               | 0.408 | 0.00E+00 | chromosome_3  | 2051634 | 2055049 |        |
| CUST_2481_PI425379931  | Au9.Cre09.g417000 | hypothetical protein                                                                            | 0.407 | 3.41E-02 | chromosome_9  | 4654064 | 4656132 |        |
|                        |                   | CHLREDRAFT_175511                                                                               |       |          |               |         |         |        |
| CUST_12969_PI425379931 | Au9.Cre11.g468050 | predicted protein                                                                               | 0.406 | 0.00E+00 | chromosome_11 | 96924   | 101523  |        |
| CUST_9747_PI425379931  | Au9.Cre09.g399250 | ketoacid isomerase-like protein                                                                 | 0.406 | 2.18E-02 | chromosome_9  | 2032983 | 2035597 |        |
| CUST_1263_PI425379931  | Au9.Cre30.g779300 | pol-like protein                                                                                | 0.404 | 0.00E+00 | scaffold_30   | 101196  | 115207  |        |
| CUST_9202_PI425379931  | Au9.Cre03.g150950 | glycosyl transferase                                                                            | 0.404 | 6.62E-03 | chromosome_3  | 437398  | 439261  | K00721 |
| CUST_4526_PI425379931  | Au9.Cre06.g303300 | Peptidyl-prolyl cis-trans isomerase,<br>cyclophilin-type                                        | 0.402 | 0.00E+00 | chromosome_6  | 6619153 | 6623098 |        |
| CUST_6165_PI425379931  | Au9.Cre53.g790600 | pol-like protein                                                                                | 0.401 | 0.00E+00 | scaffold_53   | 476     | 3925    |        |
| CUST_1169_PI425379931  | Au9.Cre01.g038900 | phospholipase-related                                                                           | 0.401 | 1.13E-02 | chromosome_1  | 5345110 | 5348123 | K01054 |
| CUST_10572_PI425379931 | Au9.Cre05.g240850 | Hydroxymethylpyrimidine<br>phosphate synthase;<br>Hydroxymethylpyrimidine<br>phosphate synthase | 0.4   | 0.00E+00 | chromosome_5  | 2039096 | 2047535 | K03147 |
| CUST_6327_PI425379931  | Au9.Cre02.g093250 | pol-like protein                                                                                | 0.4   | 9.24E-03 | chromosome_2  | 2539756 | 2541301 |        |
| CUST_2847_PI425379931  | Au9.Cre16.g685500 | kelch repeat domain                                                                             | 0.395 | 0.00E+00 | chromosome_16 | 5134629 | 5137850 |        |
| CUST_7623_PI425379931  | Au9.Cre13.g598900 | light-harvesting protein of<br>photosystem I                                                    | 0.394 | 1.13E-02 | chromosome_13 | 5048702 | 5051040 |        |

|                        |                   |                                           |       |          |               |         |         |        |
|------------------------|-------------------|-------------------------------------------|-------|----------|---------------|---------|---------|--------|
| CUST_7818_P1425379931  | Au9.Cre07.g356300 | ubiquitin-like protein                    | 0.393 | 1.13E-02 | chromosome_7  | 5939252 | 5940669 |        |
| CUST_3797_P1425379931  | Au9.Cre06.g299700 | SOUL heme-binding protein                 | 0.393 | 0.00E+00 | chromosome_6  | 6115091 | 6117345 |        |
| CUST_235_P1425379931   | Au9.Cre05.g233900 | L-ascorbate peroxidase                    | 0.393 | 0.00E+00 | chromosome_5  | 798281  | 801706  | K00434 |
| CUST_13606_P1425379931 | Au9.Cre10.g423050 | gag/pol/env polyprotein                   | 0.392 | 7.40E-03 | chromosome_10 | 778846  | 782592  | K04228 |
| CUST_14111_P1425379931 | Au9.Cre04.g216250 | Flagellar Associated Protein              | 0.392 | 7.79E-03 | chromosome_4  | 767586  | 768807  |        |
| CUST_7130_P1425379931  | Au9.Cre12.g513700 | dead box atp-dependent rna<br>helicase    | 0.391 | 0.00E+00 | chromosome_12 | 3440910 | 3449635 |        |
| CUST_14057_P1425379931 | Au9.Cre51.g790200 | pol-like protein                          | 0.39  | 0.00E+00 | scaffold_51   | 36970   | 39055   |        |
| CUST_6547_P1425379931  | Au9.Cre07.g334750 | protein phosphatase 2c                    | 0.389 | 2.66E-02 | chromosome_7  | 3064056 | 3071717 |        |
| CUST_8178_P1425379931  | Au9.Cre40.g786150 | pol-like protein                          | 0.386 | 0.00E+00 | scaffold_40   | 26980   | 31115   |        |
| CUST_11886_P1425379931 | Au9.Cre02.g110800 | drug transporter-related                  | 0.386 | 9.24E-03 | chromosome_2  | 4888084 | 4897695 |        |
| CUST_4714_P1425379931  | Au9.Cre04.g222850 | hypothetical protein<br>CHLREDRAFT_94488  | 0.385 | 8.29E-03 | chromosome_4  | 1811612 | 1813286 |        |
| CUST_14199_P1425379931 | Au9.Cre12.g539250 | hypothetical protein<br>CHLREDRAFT_180456 | 0.384 | 4.59E-03 | chromosome_12 | 6535894 | 6538515 |        |
| CUST_4951_P1425379931  | Au9.Cre01.g017700 | MaoC-like dehydratase                     | 0.384 | 7.21E-03 | chromosome_1  | 2720121 | 2729419 |        |
| CUST_4757_P1425379931  | Au9.Cre26.g774100 | atp-binding cassette protein c4-like      | 0.381 | 4.30E-03 | scaffold_26   | 310787  | 317272  |        |
| CUST_14031_P1425379931 | Au9.Cre02.g137250 | pol-like protein                          | 0.381 | 6.09E-03 | chromosome_2  | 8422148 | 8423419 |        |

|                        |                   |                                                        |       |          |               |         |         |        |
|------------------------|-------------------|--------------------------------------------------------|-------|----------|---------------|---------|---------|--------|
| CUST_14604_PI425379931 | Au9.Cre01.g003950 |                                                        | 0.378 | 1.83E-02 | chromosome_1  | 733795  | 752444  |        |
| CUST_1654_PI425379931  | Au9.Cre55.g790850 | pol-like protein                                       | 0.375 | 3.93E-03 | scaffold_55   | 22120   | 23265   |        |
| CUST_2982_PI425379931  | Au9.Cre03.g151650 | S-adenosyl-L-methionine-dependent<br>methyltransferase | 0.374 | 3.56E-02 | chromosome_3  | 521746  | 525589  |        |
| CUST_73_PI425379931    | Au9.Cre16.g666700 | pol-like protein                                       | 0.372 | 5.55E-03 | chromosome_16 | 2539742 | 2540883 |        |
| CUST_4166_PI425379931  | Au9.Cre40.g786250 | pol-like protein                                       | 0.37  | 7.21E-03 | scaffold_40   | 81326   | 83607   |        |
| CUST_1960_PI425379931  | Au9.Cre12.g536300 | predicted protein                                      | 0.368 | 0.00E+00 | chromosome_12 | 6042656 | 6050437 |        |
| CUST_11772_PI425379931 | Au9.Cre09.g405450 | hypothetical protein                                   | 0.368 | 0.00E+00 | chromosome_9  | 2978547 | 2980611 |        |
| CUST_13142_PI425379931 | Au9.Cre13.g602100 | pol-like protein                                       | 0.364 | 5.18E-03 | chromosome_13 | 5499622 | 5503417 |        |
| CUST_2584_PI425379931  | Au9.Cre12.g494850 | Adenylate Kinase 3                                     | 0.364 | 6.09E-03 | chromosome_12 | 1443798 | 1446667 | K00939 |
| CUST_1335_PI425379931  | Au9.Cre14.g617450 | heat shock protein 22E                                 | 0.363 | 1.28E-02 | chromosome_14 | 1395808 | 1397277 |        |
| CUST_9659_PI425379931  | Au9.Cre52.g790450 | pol-like protein                                       | 0.36  | 0.00E+00 | scaffold_52   | 17390   | 19275   |        |
| CUST_1770_PI425379931  | Au9.Cre02.g137150 | pol-like protein                                       | 0.36  | 4.30E-03 | chromosome_2  | 8384148 | 8385409 |        |
| CUST_6054_PI425379931  | Au9.Cre04.g228650 | mgatp-energized glutathione s-<br>conjugate            | 0.359 | 0.00E+00 | chromosome_4  | 2788797 | 2812072 | K05667 |
| CUST_12679_PI425379931 | Au9.Cre10.g452050 | light-harvesting protein of<br>photosystem I           | 0.357 | 6.46E-03 | chromosome_10 | 4491980 | 4495280 | K08908 |
| CUST_2400_PI425379931  | Au9.Cre06.g283950 | chloropyll a-b binding protein of                      | 0.356 | 9.24E-03 | chromosome_6  | 4071795 | 4073491 | K08912 |



## LHCII

|                        |                   |                                                         |       |          |               |         |         |        |
|------------------------|-------------------|---------------------------------------------------------|-------|----------|---------------|---------|---------|--------|
| CUST_893_PI425379931   | Au9.Cre29.g777900 | methyltransferase family                                | 0.353 | 1.05E-02 | scaffold_29   | 53466   | 57277   |        |
| CUST_7411_PI425379931  | Au9.Cre13.g594200 | hypothetical protein                                    | 0.352 | 1.37E-02 | chromosome_13 | 4530080 | 4532030 |        |
|                        |                   | CHLREDRAFT_151390                                       |       |          |               |         |         |        |
| CUST_1932_PI425379931  | Au9.Cre01.g062500 | predicted protein                                       | 0.35  | 0.00E+00 | chromosome_1  | 8630590 | 8632381 |        |
| CUST_13194_PI425379931 | Au9.Cre14.g625350 | integral membrane protein                               | 0.347 | 5.55E-03 | chromosome_14 | 2555159 | 2561648 |        |
| CUST_11585_PI425379931 | Au9.Cre08.g360100 | allophanate hydrolase                                   | 0.347 | 5.34E-03 | chromosome_8  | 283650  | 289781  | K01457 |
| CUST_6228_PI425379931  | Au9.Cre01.g062700 | pol-like protein                                        | 0.347 | 6.09E-03 | chromosome_1  | 8660510 | 8662241 |        |
| CUST_6719_PI425379931  | Au9.Cre07.g348350 | predicted protein                                       | 0.346 | 1.65E-02 | chromosome_7  | 4906089 | 4910029 |        |
| CUST_3411_PI425379931  | Au9.Cre14.g613800 | hypothetical protein                                    | 0.344 | 1.83E-02 | chromosome_14 | 937561  | 942310  |        |
|                        |                   | CHLREDRAFT_152091                                       |       |          |               |         |         |        |
| CUST_3026_PI425379931  | Au9.Cre17.g742900 | reverse transcriptase                                   | 0.343 | 0.00E+00 | chromosome_17 | 6416817 | 6432678 | K14401 |
| CUST_10153_PI425379931 | Au9.Cre08.g359350 | biotin carboxylase, acetyl-CoA<br>carboxylase component | 0.341 | 0.00E+00 | chromosome_8  | 157589  | 166955  | K01961 |
| CUST_7007_PI425379931  | Au9.Cre25.g771750 | reverse transcriptases                                  | 0.339 | 5.10E-03 | scaffold_25   | 301804  | 307399  |        |
| CUST_13960_PI425379931 | Au9.Cre51.g790350 | pol-like protein                                        | 0.338 | 0.00E+00 | scaffold_51   | 59446   | 62951   |        |
| CUST_7697_PI425379931  | Au9.Cre12.g539500 | pol-like protein                                        | 0.338 | 0.00E+00 | chromosome_12 | 6613678 | 6621033 |        |
| CUST_6993_PI425379931  | Au9.Cre02.g117150 | AAA+-type ATPase                                        | 0.338 | 0.00E+00 | chromosome_2  | 5674217 | 5680078 | K00413 |

|                        |                   |                                                                                           |       |          |               |         |         |        |
|------------------------|-------------------|-------------------------------------------------------------------------------------------|-------|----------|---------------|---------|---------|--------|
| CUST_7042_PI425379931  | Au9.Cre30.g779250 | reverse transcriptases                                                                    | 0.337 | 0.00E+00 | scaffold_30   | 77600   | 93665   |        |
| CUST_2961_PI425379931  | Au9.Cre12.g493050 | predicted protein                                                                         | 0.336 | 4.15E-03 | chromosome_12 | 1237066 | 1242769 |        |
| CUST_1855_PI425379931  | Au9.Cre02.g141750 | tubulin polymerization promoting<br>protein                                               | 0.336 | 7.40E-03 | chromosome_2  | 9151084 | 9154269 |        |
| CUST_560_PI425379931   | Au9.Cre13.g597250 | hypothetical protein<br>CHLREDRAFT_151338                                                 | 0.334 | 4.30E-03 | chromosome_13 | 4866406 | 4872285 |        |
| CUST_10335_PI425379931 | Au9.Cre03.g168950 | predicted protein                                                                         | 0.334 | 4.59E-03 | chromosome_3  | 2693550 | 2694908 |        |
| CUST_12182_PI425379931 | Au9.Cre16.g666850 | reverse transcriptases                                                                    | 0.33  | 0.00E+00 | chromosome_16 | 2559862 | 2565553 |        |
| CUST_10962_PI425379931 | Au9.Cre01.g069500 | predicted protein; DNA Repair<br>Enzyme;predicted protein; DNA<br>Repair Enzyme           | 0.328 | 5.34E-03 | chromosome_1  | 9494272 | 9494747 |        |
| CUST_6452_PI425379931  | Au9.Cre01.g062100 | predicted protein                                                                         | 0.328 | 4.75E-03 | chromosome_1  | 8589674 | 8592559 |        |
| CUST_9251_PI425379931  | Au9.Cre01.g033800 | dead box atp-dependent rna<br>helicase                                                    | 0.328 | 8.07E-03 | chromosome_1  | 4702069 | 4705460 |        |
| CUST_11144_PI425379931 | Au9.Cre02.g093000 | heat shock protein 70d                                                                    | 0.324 | 0.00E+00 | chromosome_2  | 2480020 | 2481435 |        |
| CUST_7684_PI425379931  | Au9.Cre14.g625250 | lactosylceramide 4-alpha-<br>galactosyltransferase (alpha- 1,4-<br>galactosyltransferase) | 0.322 | 1.59E-02 | chromosome_14 | 2535669 | 2540201 |        |
| CUST_9766_PI425379931  | Au9.Cre02.g097800 | ABC transporter                                                                           | 0.319 | 1.73E-02 | chromosome_2  | 3208392 | 3215493 | K05666 |

|                        |                   |                                                  |       |          |               |         |         |        |
|------------------------|-------------------|--------------------------------------------------|-------|----------|---------------|---------|---------|--------|
| CUST_6610_PI425379931  | Au9.Cre18.g747850 | fibrillin 2                                      | 0.312 | 5.10E-03 | scaffold_18   | 697989  | 700592  |        |
| CUST_11004_PI425379931 | Au9.Cre13.g572750 | Copper amine oxidase, amiloride-sensitive        | 0.31  | 4.16E-02 | chromosome_13 | 1494443 | 1502684 | K11182 |
| CUST_6968_PI425379931  | Au9.Cre18.g745750 |                                                  | 0.309 | 4.30E-03 | scaffold_18   | 361782  | 388626  |        |
| CUST_10722_PI425379931 | Au9.Cre03.g148700 | predicted protein                                | 0.309 | 8.07E-03 | chromosome_3  | 129652  | 132185  |        |
| CUST_2563_PI425379931  | Au9.Cre01.g060950 | N-acetyl-gamma-glutamyl-phosphate reductase      | 0.308 | 1.26E-02 | chromosome_1  | 8435584 | 8441177 |        |
| CUST_12376_PI425379931 | Au9.Cre12.g554100 | predicted protein                                | 0.305 | 2.29E-02 | chromosome_12 | 8388735 | 8397670 |        |
| CUST_12075_PI425379931 | Au9.Cre17.g727300 | NADH:flavin oxidoreductase                       | 0.301 | 6.04E-03 | chromosome_17 | 3739694 | 3743659 | K10680 |
| CUST_10059_PI425379931 | Au9.Cre16.g648300 | major facilitator superfamily                    | 0.299 | 1.00E-02 | chromosome_16 | 103204  | 109365  | K12301 |
| CUST_2075_PI425379931  | Au9.Cre10.g432950 | predicted protein                                | 0.294 | 0.00E+00 | chromosome_10 | 2009810 | 2013802 |        |
| CUST_1922_PI425379931  | Au9.Cre12.g504600 | Histone H4                                       | 0.291 | 0.00E+00 | chromosome_12 | 2447167 | 2447805 | K11254 |
| CUST_338_PI425379931   | Au9.Cre05.g234900 | pol-like protein                                 | 0.29  | 0.00E+00 | chromosome_5  | 971469  | 974854  |        |
| CUST_9410_PI425379931  | Au9.Cre03.g162800 | low-CO2-inducible membrane protein               | 0.251 | 1.83E-02 | chromosome_3  | 1912556 | 1915165 |        |
| CUST_217_PI425379931   | Au9.Cre08.g365900 | stress-related chlorophyll a/b binding protein 1 | 0.25  | 9.80E-03 | chromosome_8  | 1257470 | 1259618 | K08907 |
| CUST_14577_PI425379931 | Au9.Cre37.g784750 | heat shock protein 70D                           | 0.249 | 0.00E+00 | scaffold_37   | 14323   | 16445   |        |

|                        |                   |                                                |        |          |               |         |         |        |
|------------------------|-------------------|------------------------------------------------|--------|----------|---------------|---------|---------|--------|
| CUST_2423_PI425379931  | Au9.Cre12.g537000 | predicted protein                              | 0.247  | 7.21E-03 | chromosome_12 | 6136367 | 6139268 |        |
| CUST_13597_PI425379931 | Au9.Cre01.g000150 | Zinc-nutrition responsive permease transporter | 0.242  | 9.46E-03 | chromosome_1  | 25206   | 29917   |        |
| CUST_10411_PI425379931 | Au9.Cre12.g506750 | cell wall protein pherophorin-c4               | 0.241  | 2.83E-02 | chromosome_12 | 2606280 | 2612075 |        |
| CUST_2806_PI425379931  | Au9.Cre12.g530600 | glutamine synthetase                           | 0.238  | 4.98E-02 | chromosome_12 | 5319964 | 5322778 | K01915 |
| CUST_2027_PI425379931  | Au9.Cre10.g463500 | mapkk-related serine/threonine protein kinases | 0.236  | 1.13E-02 | chromosome_10 | 6086696 | 6094614 |        |
| CUST_6973_PI425379931  | Au9.Cre17.g707550 |                                                | 0.214  | 4.34E-02 | chromosome_17 | 1570470 | 1580906 |        |
| CUST_6270_PI425379931  | Au9.Cre01.g012050 | Formate/nitrite transporter                    | 0.207  | 0.00E+00 | chromosome_1  | 2014474 | 2018767 | K00122 |
| CUST_9724_PI425379931  | Au9.Cre07.g355150 | zinc-nutrition responsive transporter          | 0.188  | 0.00E+00 | chromosome_7  | 5797046 | 5800997 |        |
| CUST_11710_PI425379931 | Au9.Cre14.g620650 | cell wall protein pherophorin-C13              | 0.181  | 0.00E+00 | chromosome_14 | 1862034 | 1865728 |        |
| CUST_14340_PI425379931 | Au9.Cre16.g658400 | Apoferredoxin                                  | 0.164  | 8.07E-03 | chromosome_16 | 1387335 | 1388912 | K02639 |
| CUST_13661_PI425379931 | Au9.Cre16.g673250 | squamosa promoter binding protein              | 0.139  | 3.12E-02 | chromosome_16 | 3522344 | 3532692 |        |
| CUST_11046_PI425379931 | Au9.Cre08.g360050 | urea carboxylase                               | 0.0977 | 1.13E-02 | chromosome_8  | 273181  | 283469  | K01941 |
| CUST_1662_PI425379931  | Au9.Cre14.g615350 | truncated hemoglobin                           | 0.0688 | 0.00E+00 | chromosome_14 | 1124848 | 1127027 | K03406 |

<sup>a</sup>Fold-change indicates expression in NP exposed *C. reinhardtii* normalised to expression in control samples.

<sup>b</sup>q-value shows multiple testing corrected probability values determined by SAM within MeV.

**TABLE S4. Composition of the Bolds Basal Medium (BBM) growth media for *C. reinhardtii*.<sup>α</sup>**

| <b>Stock solution no.</b> | <b>Name</b>                                 | <b>Formula</b>                                       | <b>Weight (g)</b> | <b>Distilled water (mL)</b> | <b>Volume required for 1L BBM (ml)</b> |
|---------------------------|---------------------------------------------|------------------------------------------------------|-------------------|-----------------------------|----------------------------------------|
| 1                         | di-potassium hydrogen orthophosphate        | K <sub>2</sub> HPO <sub>4</sub>                      | 1.875             | 250                         | 10                                     |
| 2                         | Potassium di-hydrogen orthophosphate        | KH <sub>2</sub> PO <sub>4</sub>                      | 4.375             | 250                         | 10                                     |
| 3                         | Magnesium sulphate                          | MgSO <sub>4</sub> .7H <sub>2</sub> O                 | 1.875             | 250                         | 10                                     |
| 4                         | Sodium nitrate                              | NaNO <sub>3</sub>                                    | 6.250             | 250                         | 10                                     |
| 5                         | Calcium chloride                            | CaCl <sub>2</sub> .2H <sub>2</sub> O                 | 0.625             | 250                         | 10                                     |
| 6                         | Sodium chloride                             | NaCl                                                 | 0.625             | 250                         | 10                                     |
| 7                         | Ferrous sulphate                            | FeSO <sub>4</sub> .7H <sub>2</sub> O                 | 0.498             | 100                         | 1                                      |
|                           | Sulphuric acid conc.<br>(wt per mL = 1.84g) | H <sub>2</sub> SO <sub>4</sub>                       | 0.1mL             |                             |                                        |
| 8                         | Boric acid                                  | H <sub>3</sub> BO <sub>3</sub>                       | 1.142             | 100                         | 1                                      |
| 9                         | Zinc sulphate                               | ZnSO <sub>4</sub> .7H <sub>2</sub> O                 | 0.353             | 25                          | 0.1                                    |
| 10                        | Manganese chloride                          | MnCl <sub>2</sub> .4H <sub>2</sub> O                 | 0.058             | 25                          | 0.1                                    |
| 11                        | Cupric sulphate                             | CuSO <sub>4</sub> .5H <sub>2</sub> O                 | 0.063             | 25                          | 0.1                                    |
| 12                        | Cobaltous nitrate                           | Co(NO <sub>3</sub> ) <sub>2</sub> .6H <sub>2</sub> O | 0.020             | 25                          | 0.1                                    |
| 13                        | Sodium molybdate                            | Na <sub>2</sub> MoO <sub>4</sub> .2H <sub>2</sub> O  | 0.048             | 25                          | 0.1                                    |

<sup>α</sup> Each stock solution was made individually using distilled water and autoclaved. The volumes given in the final column of the table were made up to 1L final volume using distilled water. The pH of the final media was in the range of 6.7 ± 0.3 and autoclaved prior to use.
